# Supplementary material for: Long lasting insecticidal bed nets ownership, access and use in a high malaria transmission setting before and after a mass distribution campaign in Uganda
Source: PubMed Central journal article supplement (PMC5773208; doi:10.1371/journal.pone.0191191), 2018-01-18
Supplement: pone.0191191.s001.pdf [file pone.0191191.s001.pdf]

2014 UGANDA MALARIA INDICATOR SURVEY  
HOUSEHOLD QUESTIONNAIRE

UGANDA  
IDRC/MOH/UBOS

FORMATTING DATE: 20 November 2014  
LANGUAGE DATE: 19 November 2014

| IDENTIFICATION (1)                   |                                                                                                                                                                                                                                                                                                                                                                                                                                                                                                                                                                                                                                                                                                                                                                                                                   |  |  |  |  |  |  |  |  |  |  |  |  |  |  |  |  |  |  |  |  |  |  |  |  |  |  |  |  |  |  |  |  |  |  |  |  |  |  |  |  |  |  |  |  |  |  |  |  |  |  |  |  |  |  |
|--------------------------------------|-------------------------------------------------------------------------------------------------------------------------------------------------------------------------------------------------------------------------------------------------------------------------------------------------------------------------------------------------------------------------------------------------------------------------------------------------------------------------------------------------------------------------------------------------------------------------------------------------------------------------------------------------------------------------------------------------------------------------------------------------------------------------------------------------------------------|--|--|--|--|--|--|--|--|--|--|--|--|--|--|--|--|--|--|--|--|--|--|--|--|--|--|--|--|--|--|--|--|--|--|--|--|--|--|--|--|--|--|--|--|--|--|--|--|--|--|--|--|--|--|
| REGION _____                         | <table border="1" style="width: 100%; height: 100%; border-collapse: collapse;"> <tr><td style="width: 10%;"></td><td style="width: 10%;"></td><td style="width: 10%;"></td><td style="width: 10%;"></td><td style="width: 10%;"></td><td style="width: 10%;"></td></tr> <tr><td></td><td></td><td></td><td></td><td></td><td></td></tr> <tr><td></td><td></td><td></td><td></td><td></td><td></td></tr> <tr><td></td><td></td><td></td><td></td><td></td><td></td></tr> <tr><td></td><td></td><td></td><td></td><td></td><td></td></tr> <tr><td></td><td></td><td></td><td></td><td></td><td></td></tr> <tr><td></td><td></td><td></td><td></td><td></td><td></td></tr> <tr><td></td><td></td><td></td><td></td><td></td><td></td></tr> <tr><td></td><td></td><td></td><td></td><td></td><td></td></tr> </table> |  |  |  |  |  |  |  |  |  |  |  |  |  |  |  |  |  |  |  |  |  |  |  |  |  |  |  |  |  |  |  |  |  |  |  |  |  |  |  |  |  |  |  |  |  |  |  |  |  |  |  |  |  |  |
|                                      |                                                                                                                                                                                                                                                                                                                                                                                                                                                                                                                                                                                                                                                                                                                                                                                                                   |  |  |  |  |  |  |  |  |  |  |  |  |  |  |  |  |  |  |  |  |  |  |  |  |  |  |  |  |  |  |  |  |  |  |  |  |  |  |  |  |  |  |  |  |  |  |  |  |  |  |  |  |  |  |
|                                      |                                                                                                                                                                                                                                                                                                                                                                                                                                                                                                                                                                                                                                                                                                                                                                                                                   |  |  |  |  |  |  |  |  |  |  |  |  |  |  |  |  |  |  |  |  |  |  |  |  |  |  |  |  |  |  |  |  |  |  |  |  |  |  |  |  |  |  |  |  |  |  |  |  |  |  |  |  |  |  |
|                                      |                                                                                                                                                                                                                                                                                                                                                                                                                                                                                                                                                                                                                                                                                                                                                                                                                   |  |  |  |  |  |  |  |  |  |  |  |  |  |  |  |  |  |  |  |  |  |  |  |  |  |  |  |  |  |  |  |  |  |  |  |  |  |  |  |  |  |  |  |  |  |  |  |  |  |  |  |  |  |  |
|                                      |                                                                                                                                                                                                                                                                                                                                                                                                                                                                                                                                                                                                                                                                                                                                                                                                                   |  |  |  |  |  |  |  |  |  |  |  |  |  |  |  |  |  |  |  |  |  |  |  |  |  |  |  |  |  |  |  |  |  |  |  |  |  |  |  |  |  |  |  |  |  |  |  |  |  |  |  |  |  |  |
|                                      |                                                                                                                                                                                                                                                                                                                                                                                                                                                                                                                                                                                                                                                                                                                                                                                                                   |  |  |  |  |  |  |  |  |  |  |  |  |  |  |  |  |  |  |  |  |  |  |  |  |  |  |  |  |  |  |  |  |  |  |  |  |  |  |  |  |  |  |  |  |  |  |  |  |  |  |  |  |  |  |
|                                      |                                                                                                                                                                                                                                                                                                                                                                                                                                                                                                                                                                                                                                                                                                                                                                                                                   |  |  |  |  |  |  |  |  |  |  |  |  |  |  |  |  |  |  |  |  |  |  |  |  |  |  |  |  |  |  |  |  |  |  |  |  |  |  |  |  |  |  |  |  |  |  |  |  |  |  |  |  |  |  |
|                                      |                                                                                                                                                                                                                                                                                                                                                                                                                                                                                                                                                                                                                                                                                                                                                                                                                   |  |  |  |  |  |  |  |  |  |  |  |  |  |  |  |  |  |  |  |  |  |  |  |  |  |  |  |  |  |  |  |  |  |  |  |  |  |  |  |  |  |  |  |  |  |  |  |  |  |  |  |  |  |  |
|                                      |                                                                                                                                                                                                                                                                                                                                                                                                                                                                                                                                                                                                                                                                                                                                                                                                                   |  |  |  |  |  |  |  |  |  |  |  |  |  |  |  |  |  |  |  |  |  |  |  |  |  |  |  |  |  |  |  |  |  |  |  |  |  |  |  |  |  |  |  |  |  |  |  |  |  |  |  |  |  |  |
|                                      |                                                                                                                                                                                                                                                                                                                                                                                                                                                                                                                                                                                                                                                                                                                                                                                                                   |  |  |  |  |  |  |  |  |  |  |  |  |  |  |  |  |  |  |  |  |  |  |  |  |  |  |  |  |  |  |  |  |  |  |  |  |  |  |  |  |  |  |  |  |  |  |  |  |  |  |  |  |  |  |
| DISTRICT _____                       |                                                                                                                                                                                                                                                                                                                                                                                                                                                                                                                                                                                                                                                                                                                                                                                                                   |  |  |  |  |  |  |  |  |  |  |  |  |  |  |  |  |  |  |  |  |  |  |  |  |  |  |  |  |  |  |  |  |  |  |  |  |  |  |  |  |  |  |  |  |  |  |  |  |  |  |  |  |  |  |
| COUNTY _____                         |                                                                                                                                                                                                                                                                                                                                                                                                                                                                                                                                                                                                                                                                                                                                                                                                                   |  |  |  |  |  |  |  |  |  |  |  |  |  |  |  |  |  |  |  |  |  |  |  |  |  |  |  |  |  |  |  |  |  |  |  |  |  |  |  |  |  |  |  |  |  |  |  |  |  |  |  |  |  |  |
| SUBCOUNTY/TOWN _____                 |                                                                                                                                                                                                                                                                                                                                                                                                                                                                                                                                                                                                                                                                                                                                                                                                                   |  |  |  |  |  |  |  |  |  |  |  |  |  |  |  |  |  |  |  |  |  |  |  |  |  |  |  |  |  |  |  |  |  |  |  |  |  |  |  |  |  |  |  |  |  |  |  |  |  |  |  |  |  |  |
| PARISH/LC2 NAME _____                |                                                                                                                                                                                                                                                                                                                                                                                                                                                                                                                                                                                                                                                                                                                                                                                                                   |  |  |  |  |  |  |  |  |  |  |  |  |  |  |  |  |  |  |  |  |  |  |  |  |  |  |  |  |  |  |  |  |  |  |  |  |  |  |  |  |  |  |  |  |  |  |  |  |  |  |  |  |  |  |
| EA NAME _____                        |                                                                                                                                                                                                                                                                                                                                                                                                                                                                                                                                                                                                                                                                                                                                                                                                                   |  |  |  |  |  |  |  |  |  |  |  |  |  |  |  |  |  |  |  |  |  |  |  |  |  |  |  |  |  |  |  |  |  |  |  |  |  |  |  |  |  |  |  |  |  |  |  |  |  |  |  |  |  |  |
| UMIS NUMBER .....                    |                                                                                                                                                                                                                                                                                                                                                                                                                                                                                                                                                                                                                                                                                                                                                                                                                   |  |  |  |  |  |  |  |  |  |  |  |  |  |  |  |  |  |  |  |  |  |  |  |  |  |  |  |  |  |  |  |  |  |  |  |  |  |  |  |  |  |  |  |  |  |  |  |  |  |  |  |  |  |  |
| URBAN=1, PERI URBAN=2, RURAL=3 ..... |                                                                                                                                                                                                                                                                                                                                                                                                                                                                                                                                                                                                                                                                                                                                                                                                                   |  |  |  |  |  |  |  |  |  |  |  |  |  |  |  |  |  |  |  |  |  |  |  |  |  |  |  |  |  |  |  |  |  |  |  |  |  |  |  |  |  |  |  |  |  |  |  |  |  |  |  |  |  |  |
| NAME OF HEAD OF HOUSEHOLD _____      |                                                                                                                                                                                                                                                                                                                                                                                                                                                                                                                                                                                                                                                                                                                                                                                                                   |  |  |  |  |  |  |  |  |  |  |  |  |  |  |  |  |  |  |  |  |  |  |  |  |  |  |  |  |  |  |  |  |  |  |  |  |  |  |  |  |  |  |  |  |  |  |  |  |  |  |  |  |  |  |
| HOUSEHOLD NUMBER .....               | <table border="1" style="width: 100%; border-collapse: collapse;"> <tr><td style="width: 10%;"></td><td style="width: 10%;"></td><td style="width: 10%;"></td></tr> </table>                                                                                                                                                                                                                                                                                                                                                                                                                                                                                                                                                                                                                                      |  |  |  |  |  |  |  |  |  |  |  |  |  |  |  |  |  |  |  |  |  |  |  |  |  |  |  |  |  |  |  |  |  |  |  |  |  |  |  |  |  |  |  |  |  |  |  |  |  |  |  |  |  |  |
|                                      |                                                                                                                                                                                                                                                                                                                                                                                                                                                                                                                                                                                                                                                                                                                                                                                                                   |  |  |  |  |  |  |  |  |  |  |  |  |  |  |  |  |  |  |  |  |  |  |  |  |  |  |  |  |  |  |  |  |  |  |  |  |  |  |  |  |  |  |  |  |  |  |  |  |  |  |  |  |  |  |
| HOUSEHOLD SAMPLE NUMBER .....        | <table border="1" style="width: 100%; border-collapse: collapse;"> <tr><td style="width: 10%;"></td><td style="width: 10%;"></td></tr> </table>                                                                                                                                                                                                                                                                                                                                                                                                                                                                                                                                                                                                                                                                   |  |  |  |  |  |  |  |  |  |  |  |  |  |  |  |  |  |  |  |  |  |  |  |  |  |  |  |  |  |  |  |  |  |  |  |  |  |  |  |  |  |  |  |  |  |  |  |  |  |  |  |  |  |  |
|                                      |                                                                                                                                                                                                                                                                                                                                                                                                                                                                                                                                                                                                                                                                                                                                                                                                                   |  |  |  |  |  |  |  |  |  |  |  |  |  |  |  |  |  |  |  |  |  |  |  |  |  |  |  |  |  |  |  |  |  |  |  |  |  |  |  |  |  |  |  |  |  |  |  |  |  |  |  |  |  |  |

| INTERVIEWER VISITS                                                                                                                                                                                                                                                                                                                |       |       |       |                                                                                                                                                                                                                                                                                                                                                                                                                                                                                                                                                                                                                                                                                                                            |  |  |  |  |  |  |  |  |  |  |  |  |
|-----------------------------------------------------------------------------------------------------------------------------------------------------------------------------------------------------------------------------------------------------------------------------------------------------------------------------------|-------|-------|-------|----------------------------------------------------------------------------------------------------------------------------------------------------------------------------------------------------------------------------------------------------------------------------------------------------------------------------------------------------------------------------------------------------------------------------------------------------------------------------------------------------------------------------------------------------------------------------------------------------------------------------------------------------------------------------------------------------------------------------|--|--|--|--|--|--|--|--|--|--|--|--|
|                                                                                                                                                                                                                                                                                                                                   | 1     | 2     | 3     | FINAL VISIT                                                                                                                                                                                                                                                                                                                                                                                                                                                                                                                                                                                                                                                                                                                |  |  |  |  |  |  |  |  |  |  |  |  |
| DATE                                                                                                                                                                                                                                                                                                                              | _____ | _____ | _____ | DAY <table border="1" style="width: 100%; border-collapse: collapse;"><tr><td style="width: 10%;"></td><td style="width: 10%;"></td><td style="width: 10%;"></td></tr></table><br>MONTH <table border="1" style="width: 100%; border-collapse: collapse;"><tr><td style="width: 10%;"></td><td style="width: 10%;"></td><td style="width: 10%;"></td><td style="width: 10%;"></td></tr></table><br>YEAR <table border="1" style="width: 100%; border-collapse: collapse;"><tr><td style="width: 10%;"></td><td style="width: 10%;"></td><td style="width: 10%;"></td><td style="width: 10%;"></td><td style="width: 10%;"></td></tr></table>                                                                               |  |  |  |  |  |  |  |  |  |  |  |  |
|                                                                                                                                                                                                                                                                                                                                   |       |       |       |                                                                                                                                                                                                                                                                                                                                                                                                                                                                                                                                                                                                                                                                                                                            |  |  |  |  |  |  |  |  |  |  |  |  |
|                                                                                                                                                                                                                                                                                                                                   |       |       |       |                                                                                                                                                                                                                                                                                                                                                                                                                                                                                                                                                                                                                                                                                                                            |  |  |  |  |  |  |  |  |  |  |  |  |
|                                                                                                                                                                                                                                                                                                                                   |       |       |       |                                                                                                                                                                                                                                                                                                                                                                                                                                                                                                                                                                                                                                                                                                                            |  |  |  |  |  |  |  |  |  |  |  |  |
| INTERVIEWER'S NAME                                                                                                                                                                                                                                                                                                                | _____ | _____ | _____ | INT. NUMBER <table border="1" style="width: 100%; border-collapse: collapse;"><tr><td style="width: 10%;"></td><td style="width: 10%;"></td><td style="width: 10%;"></td><td style="width: 10%;"></td></tr></table>                                                                                                                                                                                                                                                                                                                                                                                                                                                                                                        |  |  |  |  |  |  |  |  |  |  |  |  |
|                                                                                                                                                                                                                                                                                                                                   |       |       |       |                                                                                                                                                                                                                                                                                                                                                                                                                                                                                                                                                                                                                                                                                                                            |  |  |  |  |  |  |  |  |  |  |  |  |
| RESULT*                                                                                                                                                                                                                                                                                                                           | _____ | _____ | _____ | RESULT <table border="1" style="width: 100%; border-collapse: collapse;"><tr><td style="width: 10%;"></td></tr></table>                                                                                                                                                                                                                                                                                                                                                                                                                                                                                                                                                                                                    |  |  |  |  |  |  |  |  |  |  |  |  |
|                                                                                                                                                                                                                                                                                                                                   |       |       |       |                                                                                                                                                                                                                                                                                                                                                                                                                                                                                                                                                                                                                                                                                                                            |  |  |  |  |  |  |  |  |  |  |  |  |
| NEXT VISIT: DATE                                                                                                                                                                                                                                                                                                                  | _____ | _____ |       | TOTAL NUMBER OF VISITS <table border="1" style="width: 100%; border-collapse: collapse;"><tr><td style="width: 10%;"></td></tr></table>                                                                                                                                                                                                                                                                                                                                                                                                                                                                                                                                                                                    |  |  |  |  |  |  |  |  |  |  |  |  |
|                                                                                                                                                                                                                                                                                                                                   |       |       |       |                                                                                                                                                                                                                                                                                                                                                                                                                                                                                                                                                                                                                                                                                                                            |  |  |  |  |  |  |  |  |  |  |  |  |
| TIME                                                                                                                                                                                                                                                                                                                              | _____ | _____ |       |                                                                                                                                                                                                                                                                                                                                                                                                                                                                                                                                                                                                                                                                                                                            |  |  |  |  |  |  |  |  |  |  |  |  |
| *RESULT CODES:<br>1 COMPLETED<br>2 NO HOUSEHOLD MEMBER AT HOME OR NO COMPETENT RESPONDENT AT HOME AT TIME OF VISIT<br>3 ENTIRE HOUSEHOLD ABSENT FOR EXTENDED PERIOD OF TIME<br>4 POSTPONED<br>5 REFUSED<br>6 DWELLING VACANT OR ADDRESS NOT A DWELLING<br>7 DWELLING DESTROYED<br>8 DWELLING NOT FOUND<br>9 OTHER _____ (SPECIFY) |       |       |       | TOTAL PERSONS IN HOUSEHOLD <table border="1" style="width: 100%; border-collapse: collapse;"><tr><td style="width: 10%;"></td><td style="width: 10%;"></td></tr></table><br>TOTAL ELIGIBLE WOMEN <table border="1" style="width: 100%; border-collapse: collapse;"><tr><td style="width: 10%;"></td><td style="width: 10%;"></td></tr></table><br>TOTAL ELIGIBLE CHILDREN <table border="1" style="width: 100%; border-collapse: collapse;"><tr><td style="width: 10%;"></td><td style="width: 10%;"></td></tr></table><br>LINE NO. OF RESPONDENT TO HOUSEHOLD QUESTIONNAIRE <table border="1" style="width: 100%; border-collapse: collapse;"><tr><td style="width: 10%;"></td><td style="width: 10%;"></td></tr></table> |  |  |  |  |  |  |  |  |  |  |  |  |
|                                                                                                                                                                                                                                                                                                                                   |       |       |       |                                                                                                                                                                                                                                                                                                                                                                                                                                                                                                                                                                                                                                                                                                                            |  |  |  |  |  |  |  |  |  |  |  |  |
|                                                                                                                                                                                                                                                                                                                                   |       |       |       |                                                                                                                                                                                                                                                                                                                                                                                                                                                                                                                                                                                                                                                                                                                            |  |  |  |  |  |  |  |  |  |  |  |  |
|                                                                                                                                                                                                                                                                                                                                   |       |       |       |                                                                                                                                                                                                                                                                                                                                                                                                                                                                                                                                                                                                                                                                                                                            |  |  |  |  |  |  |  |  |  |  |  |  |
|                                                                                                                                                                                                                                                                                                                                   |       |       |       |                                                                                                                                                                                                                                                                                                                                                                                                                                                                                                                                                                                                                                                                                                                            |  |  |  |  |  |  |  |  |  |  |  |  |

|                                                                   |                                                                                                                  |                         |                    |
|-------------------------------------------------------------------|------------------------------------------------------------------------------------------------------------------|-------------------------|--------------------|
| LANGUAGE OF THE QUESTIONNAIRE .....                               | 7                                                                                                                | LANGUAGE USED:          |                    |
| LANGUAGE USED IN THE INTERVIEW .....                              | <table border="1" style="width: 100%; border-collapse: collapse;"><tr><td style="width: 10%;"></td></tr></table> |                         | 1 ATESO-KARAMOJONG |
|                                                                   |                                                                                                                  |                         |                    |
| NATIVE LANGUAGE OF RESPONDENT .....                               | <table border="1" style="width: 100%; border-collapse: collapse;"><tr><td style="width: 10%;"></td></tr></table> |                         | 2 LUGANDA          |
|                                                                   |                                                                                                                  |                         |                    |
| TRANSLATOR USED (NOT AT ALL=1; SOMETIMES=2; ALL THE TIME=3) ..... | <table border="1" style="width: 100%; border-collapse: collapse;"><tr><td style="width: 10%;"></td></tr></table> |                         | 3 LUGBARA          |
|                                                                   |                                                                                                                  |                         |                    |
| LANGUAGE OF THE QUESTIONNAIRE                                     | <b>English</b>                                                                                                   | 4 LUO                   |                    |
|                                                                   |                                                                                                                  | 5 RUNYANKORE-RUKIGA     |                    |
|                                                                   |                                                                                                                  | 6 RUNYORO-RUTORO        |                    |
|                                                                   |                                                                                                                  | 7 ENGLISH               |                    |
|                                                                   |                                                                                                                  | 8 OTHER _____ (SPECIFY) |                    |

|                       |                                                                                                                                                                            |  |  |  |                     |                                                                                                                                               |  |  |                |                                                                                                                                               |  |  |
|-----------------------|----------------------------------------------------------------------------------------------------------------------------------------------------------------------------|--|--|--|---------------------|-----------------------------------------------------------------------------------------------------------------------------------------------|--|--|----------------|-----------------------------------------------------------------------------------------------------------------------------------------------|--|--|
| SUPERVISOR NAME _____ | <table border="1" style="width: 100%; border-collapse: collapse;"><tr><td style="width: 10%;"></td><td style="width: 10%;"></td><td style="width: 10%;"></td></tr></table> |  |  |  | OFFICE EDITOR _____ | <table border="1" style="width: 100%; border-collapse: collapse;"><tr><td style="width: 10%;"></td><td style="width: 10%;"></td></tr></table> |  |  | KEYED BY _____ | <table border="1" style="width: 100%; border-collapse: collapse;"><tr><td style="width: 10%;"></td><td style="width: 10%;"></td></tr></table> |  |  |
|                       |                                                                                                                                                                            |  |  |  |                     |                                                                                                                                               |  |  |                |                                                                                                                                               |  |  |
|                       |                                                                                                                                                                            |  |  |  |                     |                                                                                                                                               |  |  |                |                                                                                                                                               |  |  |
|                       |                                                                                                                                                                            |  |  |  |                     |                                                                                                                                               |  |  |                |                                                                                                                                               |  |  |

THIS PAGE IS INTENTIONALLY BLANK

INFORMED CONSENT

Hello. My name is \_\_\_\_\_. I am working with the Ministry of Health. We are conducting a survey about malaria all over Uganda. The information we collect will help the government to plan health services. Your household was selected for the survey. I would like to ask you some questions about your household. The questions usually take about 15 to 20 minutes. All of the answers you give will be confidential and will not be shared with anyone other than members of our survey team. You don't have to be in the survey, but we hope you will agree to answer the questions since your views are important. If I ask you any question you don't want to answer, just let me know and I will go on to the next question or you can stop the interview at any time. In case you need more information about the survey, you may contact the person listed on this card.

GIVE CARD WITH CONTACT INFORMATION

Do you have any questions?  
May I begin the interview now?

SIGNATURE OF INTERVIEWER: \_\_\_\_\_ DATE: \_\_\_\_\_

RESPONDENT AGREES TO BE INTERVIEWED ... 1      RESPONDENT DOES NOT AGREE TO BE INTERVIEWED ... 2 → END

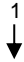

START TIME:

|         |       |                                                                                      |  |  |  |  |
|---------|-------|--------------------------------------------------------------------------------------|--|--|--|--|
| HOURS   | ..... | <table border="1"><tr><td> </td><td> </td></tr><tr><td> </td><td> </td></tr></table> |  |  |  |  |
|         |       |                                                                                      |  |  |  |  |
|         |       |                                                                                      |  |  |  |  |
| MINUTES | ..... | <table border="1"><tr><td> </td><td> </td></tr><tr><td> </td><td> </td></tr></table> |  |  |  |  |
|         |       |                                                                                      |  |  |  |  |
|         |       |                                                                                      |  |  |  |  |

**HOUSEHOLD SCHEDULE**

| LINE NO. | USUAL RESIDENTS AND VISITORS                                                                                                                                                                                                                                                                                                                                                                                 | RELATIONSHIP TO HEAD OF HOUSEHOLD                                                               | SEX                              | RESIDENCE                             |                                         | AGE                                                          | WOMEN AGE 15-49                                  | CHILDREN AGE 0-5                                  |
|----------|--------------------------------------------------------------------------------------------------------------------------------------------------------------------------------------------------------------------------------------------------------------------------------------------------------------------------------------------------------------------------------------------------------------|-------------------------------------------------------------------------------------------------|----------------------------------|---------------------------------------|-----------------------------------------|--------------------------------------------------------------|--------------------------------------------------|---------------------------------------------------|
| 1        | 2                                                                                                                                                                                                                                                                                                                                                                                                            | 3                                                                                               | 4                                | 5                                     | 6                                       | 7                                                            | 8                                                | 9                                                 |
|          | <p>Please give me the names of the persons who usually live in your household and guests of the household who stayed here last night, starting with the head of the household.</p> <p>AFTER LISTING THE NAMES AND RECORDING THE RELATIONSHIP AND SEX FOR EACH PERSON, ASK QUESTIONS 2A-2C TO BE SURE THAT THE LISTING IS COMPLETE.</p> <p>THEN ASK APPROPRIATE QUESTIONS IN COLUMNS 5-9 FOR EACH PERSON.</p> | <p>What is the relationship of (NAME) to the head of the household?</p> <p>SEE CODES BELOW.</p> | <p>Is (NAME) male or female?</p> | <p>Does (NAME) usually live here?</p> | <p>Did (NAME) stay here last night?</p> | <p>How old is (NAME)?</p> <p>IF 95 OR MORE, RECORD '95'.</p> | <p>CIRCLE LINE NUMBER OF ALL WOMEN AGE 15-49</p> | <p>CIRCLE LINE NUMBER OF ALL CHILDREN AGE 0-5</p> |
| 01       |                                                                                                                                                                                                                                                                                                                                                                                                              | <input type="text"/>                                                                            | M F<br>1 2                       | Y N<br>1 2                            | Y N<br>1 2                              | IN YEARS<br><input type="text"/>                             | 01                                               | 01                                                |
| 02       |                                                                                                                                                                                                                                                                                                                                                                                                              | <input type="text"/>                                                                            | 1 2                              | 1 2                                   | 1 2                                     | <input type="text"/>                                         | 02                                               | 02                                                |
| 03       |                                                                                                                                                                                                                                                                                                                                                                                                              | <input type="text"/>                                                                            | 1 2                              | 1 2                                   | 1 2                                     | <input type="text"/>                                         | 03                                               | 03                                                |
| 04       |                                                                                                                                                                                                                                                                                                                                                                                                              | <input type="text"/>                                                                            | 1 2                              | 1 2                                   | 1 2                                     | <input type="text"/>                                         | 04                                               | 04                                                |
| 05       |                                                                                                                                                                                                                                                                                                                                                                                                              | <input type="text"/>                                                                            | 1 2                              | 1 2                                   | 1 2                                     | <input type="text"/>                                         | 05                                               | 05                                                |
| 06       |                                                                                                                                                                                                                                                                                                                                                                                                              | <input type="text"/>                                                                            | 1 2                              | 1 2                                   | 1 2                                     | <input type="text"/>                                         | 06                                               | 06                                                |
| 07       |                                                                                                                                                                                                                                                                                                                                                                                                              | <input type="text"/>                                                                            | 1 2                              | 1 2                                   | 1 2                                     | <input type="text"/>                                         | 07                                               | 07                                                |
| 08       |                                                                                                                                                                                                                                                                                                                                                                                                              | <input type="text"/>                                                                            | 1 2                              | 1 2                                   | 1 2                                     | <input type="text"/>                                         | 08                                               | 08                                                |
| 09       |                                                                                                                                                                                                                                                                                                                                                                                                              | <input type="text"/>                                                                            | 1 2                              | 1 2                                   | 1 2                                     | <input type="text"/>                                         | 09                                               | 09                                                |
| 10       |                                                                                                                                                                                                                                                                                                                                                                                                              | <input type="text"/>                                                                            | 1 2                              | 1 2                                   | 1 2                                     | <input type="text"/>                                         | 10                                               | 10                                                |

**CODES FOR Q. 3: RELATIONSHIP TO HEAD OF HOUSEHOLD**

- |                                    |                               |
|------------------------------------|-------------------------------|
| 01 = HEAD                          | 08 = BROTHER OR SISTER        |
| 02 = WIFE OR HUSBAND               | 09 = OTHER RELATIVE           |
| 03 = SON OR DAUGHTER               | 10 = ADOPTED/FOSTER/STEPCHILD |
| 04 = SON-IN-LAW OR DAUGHTER-IN-LAW | 11 = NOT RELATED              |
| 05 = GRANDCHILD                    | 98 = DON'T KNOW               |
| 06 = PARENT                        |                               |
| 07 = PARENT-IN-LAW                 |                               |

| LINE NO. | USUAL RESIDENTS AND VISITORS                                                                                                                                                                                                                                                                                                                                                                                 | RELATIONSHIP TO HEAD OF HOUSEHOLD                                                               | SEX                              | RESIDENCE                             |                                         | AGE                                                          | WOMEN AGE 15-49                                  | CHILDREN AGE 0-5                                  |
|----------|--------------------------------------------------------------------------------------------------------------------------------------------------------------------------------------------------------------------------------------------------------------------------------------------------------------------------------------------------------------------------------------------------------------|-------------------------------------------------------------------------------------------------|----------------------------------|---------------------------------------|-----------------------------------------|--------------------------------------------------------------|--------------------------------------------------|---------------------------------------------------|
| 1        | 2                                                                                                                                                                                                                                                                                                                                                                                                            | 3                                                                                               | 4                                | 5                                     | 6                                       | 7                                                            | 8                                                | 9                                                 |
|          | <p>Please give me the names of the persons who usually live in your household and guests of the household who stayed here last night, starting with the head of the household.</p> <p>AFTER LISTING THE NAMES AND RECORDING THE RELATIONSHIP AND SEX FOR EACH PERSON, ASK QUESTIONS 2A-2C TO BE SURE THAT THE LISTING IS COMPLETE.</p> <p>THEN ASK APPROPRIATE QUESTIONS IN COLUMNS 5-9 FOR EACH PERSON.</p> | <p>What is the relationship of (NAME) to the head of the household?</p> <p>SEE CODES BELOW.</p> | <p>Is (NAME) male or female?</p> | <p>Does (NAME) usually live here?</p> | <p>Did (NAME) stay here last night?</p> | <p>How old is (NAME)?</p> <p>IF 95 OR MORE, RECORD '95'.</p> | <p>CIRCLE LINE NUMBER OF ALL WOMEN AGE 15-49</p> | <p>CIRCLE LINE NUMBER OF ALL CHILDREN AGE 0-5</p> |
| 11       |                                                                                                                                                                                                                                                                                                                                                                                                              | <input type="text"/>                                                                            | M F<br>1 2                       | Y N<br>1 2                            | Y N<br>1 2                              | IN YEARS<br><input type="text"/>                             | 11                                               | 11                                                |
| 12       |                                                                                                                                                                                                                                                                                                                                                                                                              | <input type="text"/>                                                                            | 1 2                              | 1 2                                   | 1 2                                     | <input type="text"/>                                         | 12                                               | 12                                                |
| 13       |                                                                                                                                                                                                                                                                                                                                                                                                              | <input type="text"/>                                                                            | 1 2                              | 1 2                                   | 1 2                                     | <input type="text"/>                                         | 13                                               | 13                                                |
| 14       |                                                                                                                                                                                                                                                                                                                                                                                                              | <input type="text"/>                                                                            | 1 2                              | 1 2                                   | 1 2                                     | <input type="text"/>                                         | 14                                               | 14                                                |
| 15       |                                                                                                                                                                                                                                                                                                                                                                                                              | <input type="text"/>                                                                            | 1 2                              | 1 2                                   | 1 2                                     | <input type="text"/>                                         | 15                                               | 15                                                |
| 16       |                                                                                                                                                                                                                                                                                                                                                                                                              | <input type="text"/>                                                                            | 1 2                              | 1 2                                   | 1 2                                     | <input type="text"/>                                         | 16                                               | 16                                                |
| 17       |                                                                                                                                                                                                                                                                                                                                                                                                              | <input type="text"/>                                                                            | 1 2                              | 1 2                                   | 1 2                                     | <input type="text"/>                                         | 17                                               | 17                                                |
| 18       |                                                                                                                                                                                                                                                                                                                                                                                                              | <input type="text"/>                                                                            | 1 2                              | 1 2                                   | 1 2                                     | <input type="text"/>                                         | 18                                               | 18                                                |
| 19       |                                                                                                                                                                                                                                                                                                                                                                                                              | <input type="text"/>                                                                            | 1 2                              | 1 2                                   | 1 2                                     | <input type="text"/>                                         | 19                                               | 19                                                |
| 20       |                                                                                                                                                                                                                                                                                                                                                                                                              | <input type="text"/>                                                                            | 1 2                              | 1 2                                   | 1 2                                     | <input type="text"/>                                         | 20                                               | 20                                                |

TICK HERE IF CONTINUATION SHEET USED

**CODES FOR Q.3: RELATIONSHIP TO HEAD OF HOUSEHOLD**

2A) Just to make sure that I have a complete listing: are there any other persons such as small children or infants that we have not listed?

YES  → TABLE NO

2B) Are there any other people who may not be members of your family, such as domestic servants, lodgers, or friends who usually live here?

YES  → TABLE NO

2C) Are there any guests or temporary visitors staying here, or anyone else who stayed here last night, who have not been listed?

YES  → TABLE NO

01 = HEAD  
02 = WIFE OR HUSBAND  
03 = SON OR DAUGHTER  
04 = SON-IN-LAW OR DAUGHTER-IN-LAW  
05 = GRANDCHILD  
06 = PARENT  
07 = PARENT-IN-LAW  
08 = BROTHER/SISTER  
09 = OTHER RELATIVE  
10 = ADOPTED/FOSTER/STEPCHILD  
11 = NOT RELATED  
98 = DON'T KNOW





| NO.                           | QUESTIONS AND FILTERS                                                                                                                                                                                                                                                                                                   | CODING CATEGORIES                                                                                                                                                                                                                                                                                                                                                                                                                                                                                                                                                                                                                                                                                                                                                                                                                                                                                                                                                                                              | SKIP            |                                                                                                                                                                                                                                                                                                                         |                     |                               |                |                |                   |               |   |                             |   |   |                            |   |   |                    |   |   |                          |   |   |                             |   |   |  |
|-------------------------------|-------------------------------------------------------------------------------------------------------------------------------------------------------------------------------------------------------------------------------------------------------------------------------------------------------------------------|----------------------------------------------------------------------------------------------------------------------------------------------------------------------------------------------------------------------------------------------------------------------------------------------------------------------------------------------------------------------------------------------------------------------------------------------------------------------------------------------------------------------------------------------------------------------------------------------------------------------------------------------------------------------------------------------------------------------------------------------------------------------------------------------------------------------------------------------------------------------------------------------------------------------------------------------------------------------------------------------------------------|-----------------|-------------------------------------------------------------------------------------------------------------------------------------------------------------------------------------------------------------------------------------------------------------------------------------------------------------------------|---------------------|-------------------------------|----------------|----------------|-------------------|---------------|---|-----------------------------|---|---|----------------------------|---|---|--------------------|---|---|--------------------------|---|---|-----------------------------|---|---|--|
| 111                           | MAIN MATERIAL OF THE EXTERIOR WALLS.<br><br>RECORD OBSERVATION.                                                                                                                                                                                                                                                         | NATURAL WALLS<br>NO WALLS ..... 11<br>THATCHED/STRAW ..... 12<br>DIRT ..... 13<br>RUDIMENTARY WALLS<br>MUD AND POLES ..... 21<br>STONE WITH MUD ..... 22<br>REUSED WOOD ..... 26<br>UNBURNT BRICKS ..... 27<br>UNBURNT BRICKS WITH PLASTER ... 28<br>UNBURNT BRICKS WITH MUD ..... 29<br>FINISHED WALLS<br>CEMENT ..... 31<br>STONE WITH LIME/CEMENT ..... 32<br>BURNT BRICKS WITH CEMENT ..... 33<br>CEMENT BLOCKS ..... 34<br>WOOD PLANKS/SHINGLES ..... 36<br><br>OTHER _____ 96<br>(SPECIFY)                                                                                                                                                                                                                                                                                                                                                                                                                                                                                                               |                 |                                                                                                                                                                                                                                                                                                                         |                     |                               |                |                |                   |               |   |                             |   |   |                            |   |   |                    |   |   |                          |   |   |                             |   |   |  |
| 112                           | How many rooms in this household are used for sleeping?                                                                                                                                                                                                                                                                 | ROOMS ..... <input type="text"/> <input type="text"/>                                                                                                                                                                                                                                                                                                                                                                                                                                                                                                                                                                                                                                                                                                                                                                                                                                                                                                                                                          |                 |                                                                                                                                                                                                                                                                                                                         |                     |                               |                |                |                   |               |   |                             |   |   |                            |   |   |                    |   |   |                          |   |   |                             |   |   |  |
| 113                           | Does any member of this household own:<br><br>a) A watch?<br>b) A bicycle?<br>c) A motorcycle or motor scooter?<br>d) An animal-drawn cart?<br>e) A car or truck?<br>f) A boat with a motor?<br>g) A boat without a motor?                                                                                              | <table border="0"> <tr> <td></td> <td style="text-align: center;">YES</td> <td style="text-align: center;">NO</td> </tr> <tr> <td>a) WATCH .....</td> <td style="text-align: center;">1</td> <td style="text-align: center;">2</td> </tr> <tr> <td>b) BICYCLE .....</td> <td style="text-align: center;">1</td> <td style="text-align: center;">2</td> </tr> <tr> <td>c) MOTORCYCLE/SCOOTER .....</td> <td style="text-align: center;">1</td> <td style="text-align: center;">2</td> </tr> <tr> <td>d) ANIMAL-DRAWN CART .....</td> <td style="text-align: center;">1</td> <td style="text-align: center;">2</td> </tr> <tr> <td>e) CAR/TRUCK .....</td> <td style="text-align: center;">1</td> <td style="text-align: center;">2</td> </tr> <tr> <td>f) BOAT WITH MOTOR .....</td> <td style="text-align: center;">1</td> <td style="text-align: center;">2</td> </tr> <tr> <td>g) BOAT WITH NO MOTOR .....</td> <td style="text-align: center;">1</td> <td style="text-align: center;">2</td> </tr> </table> |                 | YES                                                                                                                                                                                                                                                                                                                     | NO                  | a) WATCH .....                | 1              | 2              | b) BICYCLE .....  | 1             | 2 | c) MOTORCYCLE/SCOOTER ..... | 1 | 2 | d) ANIMAL-DRAWN CART ..... | 1 | 2 | e) CAR/TRUCK ..... | 1 | 2 | f) BOAT WITH MOTOR ..... | 1 | 2 | g) BOAT WITH NO MOTOR ..... | 1 | 2 |  |
|                               | YES                                                                                                                                                                                                                                                                                                                     | NO                                                                                                                                                                                                                                                                                                                                                                                                                                                                                                                                                                                                                                                                                                                                                                                                                                                                                                                                                                                                             |                 |                                                                                                                                                                                                                                                                                                                         |                     |                               |                |                |                   |               |   |                             |   |   |                            |   |   |                    |   |   |                          |   |   |                             |   |   |  |
| a) WATCH .....                | 1                                                                                                                                                                                                                                                                                                                       | 2                                                                                                                                                                                                                                                                                                                                                                                                                                                                                                                                                                                                                                                                                                                                                                                                                                                                                                                                                                                                              |                 |                                                                                                                                                                                                                                                                                                                         |                     |                               |                |                |                   |               |   |                             |   |   |                            |   |   |                    |   |   |                          |   |   |                             |   |   |  |
| b) BICYCLE .....              | 1                                                                                                                                                                                                                                                                                                                       | 2                                                                                                                                                                                                                                                                                                                                                                                                                                                                                                                                                                                                                                                                                                                                                                                                                                                                                                                                                                                                              |                 |                                                                                                                                                                                                                                                                                                                         |                     |                               |                |                |                   |               |   |                             |   |   |                            |   |   |                    |   |   |                          |   |   |                             |   |   |  |
| c) MOTORCYCLE/SCOOTER .....   | 1                                                                                                                                                                                                                                                                                                                       | 2                                                                                                                                                                                                                                                                                                                                                                                                                                                                                                                                                                                                                                                                                                                                                                                                                                                                                                                                                                                                              |                 |                                                                                                                                                                                                                                                                                                                         |                     |                               |                |                |                   |               |   |                             |   |   |                            |   |   |                    |   |   |                          |   |   |                             |   |   |  |
| d) ANIMAL-DRAWN CART .....    | 1                                                                                                                                                                                                                                                                                                                       | 2                                                                                                                                                                                                                                                                                                                                                                                                                                                                                                                                                                                                                                                                                                                                                                                                                                                                                                                                                                                                              |                 |                                                                                                                                                                                                                                                                                                                         |                     |                               |                |                |                   |               |   |                             |   |   |                            |   |   |                    |   |   |                          |   |   |                             |   |   |  |
| e) CAR/TRUCK .....            | 1                                                                                                                                                                                                                                                                                                                       | 2                                                                                                                                                                                                                                                                                                                                                                                                                                                                                                                                                                                                                                                                                                                                                                                                                                                                                                                                                                                                              |                 |                                                                                                                                                                                                                                                                                                                         |                     |                               |                |                |                   |               |   |                             |   |   |                            |   |   |                    |   |   |                          |   |   |                             |   |   |  |
| f) BOAT WITH MOTOR .....      | 1                                                                                                                                                                                                                                                                                                                       | 2                                                                                                                                                                                                                                                                                                                                                                                                                                                                                                                                                                                                                                                                                                                                                                                                                                                                                                                                                                                                              |                 |                                                                                                                                                                                                                                                                                                                         |                     |                               |                |                |                   |               |   |                             |   |   |                            |   |   |                    |   |   |                          |   |   |                             |   |   |  |
| g) BOAT WITH NO MOTOR .....   | 1                                                                                                                                                                                                                                                                                                                       | 2                                                                                                                                                                                                                                                                                                                                                                                                                                                                                                                                                                                                                                                                                                                                                                                                                                                                                                                                                                                                              |                 |                                                                                                                                                                                                                                                                                                                         |                     |                               |                |                |                   |               |   |                             |   |   |                            |   |   |                    |   |   |                          |   |   |                             |   |   |  |
| 114                           | Does any member of this household own any agricultural land?                                                                                                                                                                                                                                                            | YES ..... 1<br>NO ..... 2                                                                                                                                                                                                                                                                                                                                                                                                                                                                                                                                                                                                                                                                                                                                                                                                                                                                                                                                                                                      | → 116           |                                                                                                                                                                                                                                                                                                                         |                     |                               |                |                |                   |               |   |                             |   |   |                            |   |   |                    |   |   |                          |   |   |                             |   |   |  |
| 115                           | How many acres of agricultural land do members of this household own?<br><br>IF 95 OR MORE, CIRCLE '950'.<br>(1 DECIMAL = 00.1 ACRES)                                                                                                                                                                                   | ACRES ..... <input type="text"/> <input type="text"/> <input type="text"/><br><br>95 OR MORE ACRES ..... 950<br>DON'T KNOW ..... 998                                                                                                                                                                                                                                                                                                                                                                                                                                                                                                                                                                                                                                                                                                                                                                                                                                                                           |                 |                                                                                                                                                                                                                                                                                                                         |                     |                               |                |                |                   |               |   |                             |   |   |                            |   |   |                    |   |   |                          |   |   |                             |   |   |  |
| 116                           | Does this household own any livestock, herds, other farm animals, or poultry?                                                                                                                                                                                                                                           | YES ..... 1<br>NO ..... 2                                                                                                                                                                                                                                                                                                                                                                                                                                                                                                                                                                                                                                                                                                                                                                                                                                                                                                                                                                                      | → 118           |                                                                                                                                                                                                                                                                                                                         |                     |                               |                |                |                   |               |   |                             |   |   |                            |   |   |                    |   |   |                          |   |   |                             |   |   |  |
| 117                           | How many of the following animals does this household own?<br><br>IF NONE, ENTER '00'.<br>IF 95 OR MORE, ENTER '95'.<br>IF UNKNOWN, ENTER '98'.<br><br>a) Cattle?<br><br>b) Milk cows or bulls?<br><br>c) Horses, donkeys, or mules?<br><br>d) Goats?<br><br>e) Sheep?<br><br>f) Chickens?<br><br>g) Pigs?              | <table border="0"> <tr> <td>a) CATTLE .....</td> <td rowspan="7" style="text-align: center; vertical-align: middle;"> <input type="text"/><input type="text"/><br/> <input type="text"/><input type="text"/> </td> </tr> <tr> <td>b) COWS/BULLS .....</td> </tr> <tr> <td>c) HORSES/DONKEYS/MULES .....</td> </tr> <tr> <td>d) GOATS .....</td> </tr> <tr> <td>e) SHEEP .....</td> </tr> <tr> <td>f) CHICKENS .....</td> </tr> <tr> <td>g) PIGS .....</td> </tr> </table>                                                                                                                                                                                                                                                                                                | a) CATTLE ..... | <input type="text"/> <input type="text"/><br><input type="text"/> <input type="text"/> | b) COWS/BULLS ..... | c) HORSES/DONKEYS/MULES ..... | d) GOATS ..... | e) SHEEP ..... | f) CHICKENS ..... | g) PIGS ..... |   |                             |   |   |                            |   |   |                    |   |   |                          |   |   |                             |   |   |  |
| a) CATTLE .....               | <input type="text"/> <input type="text"/><br><input type="text"/> <input type="text"/> |                                                                                                                                                                                                                                                                                                                                                                                                                                                                                                                                                                                                                                                                                                                                                                                                                                                                                                                                                                                                                |                 |                                                                                                                                                                                                                                                                                                                         |                     |                               |                |                |                   |               |   |                             |   |   |                            |   |   |                    |   |   |                          |   |   |                             |   |   |  |
| b) COWS/BULLS .....           |                                                                                                                                                                                                                                                                                                                         |                                                                                                                                                                                                                                                                                                                                                                                                                                                                                                                                                                                                                                                                                                                                                                                                                                                                                                                                                                                                                |                 |                                                                                                                                                                                                                                                                                                                         |                     |                               |                |                |                   |               |   |                             |   |   |                            |   |   |                    |   |   |                          |   |   |                             |   |   |  |
| c) HORSES/DONKEYS/MULES ..... |                                                                                                                                                                                                                                                                                                                         |                                                                                                                                                                                                                                                                                                                                                                                                                                                                                                                                                                                                                                                                                                                                                                                                                                                                                                                                                                                                                |                 |                                                                                                                                                                                                                                                                                                                         |                     |                               |                |                |                   |               |   |                             |   |   |                            |   |   |                    |   |   |                          |   |   |                             |   |   |  |
| d) GOATS .....                |                                                                                                                                                                                                                                                                                                                         |                                                                                                                                                                                                                                                                                                                                                                                                                                                                                                                                                                                                                                                                                                                                                                                                                                                                                                                                                                                                                |                 |                                                                                                                                                                                                                                                                                                                         |                     |                               |                |                |                   |               |   |                             |   |   |                            |   |   |                    |   |   |                          |   |   |                             |   |   |  |
| e) SHEEP .....                |                                                                                                                                                                                                                                                                                                                         |                                                                                                                                                                                                                                                                                                                                                                                                                                                                                                                                                                                                                                                                                                                                                                                                                                                                                                                                                                                                                |                 |                                                                                                                                                                                                                                                                                                                         |                     |                               |                |                |                   |               |   |                             |   |   |                            |   |   |                    |   |   |                          |   |   |                             |   |   |  |
| f) CHICKENS .....             |                                                                                                                                                                                                                                                                                                                         |                                                                                                                                                                                                                                                                                                                                                                                                                                                                                                                                                                                                                                                                                                                                                                                                                                                                                                                                                                                                                |                 |                                                                                                                                                                                                                                                                                                                         |                     |                               |                |                |                   |               |   |                             |   |   |                            |   |   |                    |   |   |                          |   |   |                             |   |   |  |
| g) PIGS .....                 |                                                                                                                                                                                                                                                                                                                         |                                                                                                                                                                                                                                                                                                                                                                                                                                                                                                                                                                                                                                                                                                                                                                                                                                                                                                                                                                                                                |                 |                                                                                                                                                                                                                                                                                                                         |                     |                               |                |                |                   |               |   |                             |   |   |                            |   |   |                    |   |   |                          |   |   |                             |   |   |  |



| NO.  | QUESTIONS AND FILTERS                                                                                                               | CODING CATEGORIES                                                                                                                                                  | SKIP   |
|------|-------------------------------------------------------------------------------------------------------------------------------------|--------------------------------------------------------------------------------------------------------------------------------------------------------------------|--------|
| 118  | Does any member of this household have a bank account?                                                                              | YES ..... 1<br>NO ..... 2                                                                                                                                          |        |
| 119  | At any time in the past 6 months, has anyone come into your dwelling to spray the interior walls against mosquitoes?                | YES ..... 1<br>NO ..... 2<br>DON'T KNOW ..... 8                                                                                                                    | → 120B |
| 119A | How many months ago was the dwelling last sprayed?<br><br>IF LESS THAN ONE MONTH, RECORD '0' MONTHS AGO.                            | MONTHS AGO ..... <input type="text"/>                                                                                                                              |        |
| 120  | Who sprayed the dwelling?                                                                                                           | GOVERNMENT WORKER/PROGRAM ..... A<br>PRIVATE COMPANY ..... B<br>NONGOVERNMENTAL ORGANIZATION (NGO) ..... C<br><br>OTHER _____ X<br>(SPECIFY)<br>DON'T KNOW ..... Z |        |
| 120A | Did you pay for your dwelling to be sprayed?                                                                                        | YES ..... 1<br>NO ..... 2<br>DON'T KNOW ..... 8                                                                                                                    |        |
| 120B | Is there a community worker or community medicine distributor (CMD) who distributes malaria medicines in your village or community? | YES ..... 1<br>NO ..... 2<br>DON'T KNOW ..... 8                                                                                                                    | → 121  |
| 120C | Does the community health worker currently have malaria medicines available?                                                        | YES ..... 1<br>NO ..... 2<br>DON'T KNOW ..... 8                                                                                                                    |        |
| 121  | Does your household have any mosquito nets that can be used while sleeping?                                                         | YES ..... 1<br>NO ..... 2                                                                                                                                          | → 201  |
| 122  | How many mosquito nets does your household have?<br><br>IF 7 OR MORE NETS, RECORD '7'.                                              | NUMBER OF NETS ..... <input type="text"/>                                                                                                                          |        |

|      |                                                                                                                           | NET #1                                                                                                                                                                                                                                                                                                                                                                                                             | NET #2                                                                                                                                                                                                                                                                                                                                                                                                             | NET #3                                                                                                                                                                                                                                                                                                                                                                                                             |
|------|---------------------------------------------------------------------------------------------------------------------------|--------------------------------------------------------------------------------------------------------------------------------------------------------------------------------------------------------------------------------------------------------------------------------------------------------------------------------------------------------------------------------------------------------------------|--------------------------------------------------------------------------------------------------------------------------------------------------------------------------------------------------------------------------------------------------------------------------------------------------------------------------------------------------------------------------------------------------------------------|--------------------------------------------------------------------------------------------------------------------------------------------------------------------------------------------------------------------------------------------------------------------------------------------------------------------------------------------------------------------------------------------------------------------|
| 123  | ASK THE RESPONDENT TO SHOW YOU ALL THE NETS IN THE HOUSEHOLD<br><br>IF MORE THAN 3 NETS, USE ADDITIONAL QUESTIONNAIRE(S). | OBSERVED ..... 1<br>NOT OBSERVED ... 2                                                                                                                                                                                                                                                                                                                                                                             | OBSERVED ..... 1<br>NOT OBSERVED ... 2                                                                                                                                                                                                                                                                                                                                                                             | OBSERVED ..... 1<br>NOT OBSERVED ... 2                                                                                                                                                                                                                                                                                                                                                                             |
| 124  | How many months ago did your household get the mosquito net?<br><br>IF LESS THAN ONE MONTH AGO, RECORD '00'.              | MONTHS AGO ... <input type="text"/> <input type="text"/><br><br>MORE THAN 36 MONTHS AGO ... 95<br><br>NOT SURE ..... 98                                                                                                                                                                                                                                                                                            | MONTHS AGO ... <input type="text"/> <input type="text"/><br><br>MORE THAN 36 MONTHS AGO ... 95<br><br>NOT SURE ..... 98                                                                                                                                                                                                                                                                                            | MONTHS AGO ... <input type="text"/> <input type="text"/><br><br>MORE THAN 36 MONTHS AGO ... 95<br><br>NOT SURE ..... 98                                                                                                                                                                                                                                                                                            |
| 124A | Where did you get the mosquito net from?                                                                                  | PUBLIC SECTOR (GOV'T)<br>GOV'T HOSPITAL .. 01<br>GOV'T HEALTH CENTER ..... 02<br><br>PUBLIC SECTOR(PNFP/NGO)<br>HOSPITAL ..... 03<br>HEALTH CENTER . 04<br>PRIVATE MEDICAL SECTOR<br>PRIVATE HOSPITAL/<br>CLINIC ..... 05<br>PHARMACY ..... 06<br><br>OTHER SOURCE<br>SHOP ..... 07<br>OPEN MARKET ... 08<br>HAWKER ..... 09<br>CAMPAIGN ..... 10<br>CHURCH ..... 11<br><br>OTHER ..... 96<br>DOES NOT KNOW ... 98 | PUBLIC SECTOR (GOV'T)<br>GOV'T HOSPITAL .. 01<br>GOV'T HEALTH CENTER ..... 02<br><br>PUBLIC SECTOR(PNFP/NGO)<br>HOSPITAL ..... 03<br>HEALTH CENTER . 04<br>PRIVATE MEDICAL SECTOR<br>PRIVATE HOSPITAL/<br>CLINIC ..... 05<br>PHARMACY ..... 06<br><br>OTHER SOURCE<br>SHOP ..... 07<br>OPEN MARKET ... 08<br>HAWKER ..... 09<br>CAMPAIGN ..... 10<br>CHURCH ..... 11<br><br>OTHER ..... 96<br>DOES NOT KNOW ... 98 | PUBLIC SECTOR (GOV'T)<br>GOV'T HOSPITAL .. 01<br>GOV'T HEALTH CENTER ..... 02<br><br>PUBLIC SECTOR(PNFP/NGO)<br>HOSPITAL ..... 03<br>HEALTH CENTER . 04<br>PRIVATE MEDICAL SECTOR<br>PRIVATE HOSPITAL/<br>CLINIC ..... 05<br>PHARMACY ..... 06<br><br>OTHER SOURCE<br>SHOP ..... 07<br>OPEN MARKET ... 08<br>HAWKER ..... 09<br>CAMPAIGN ..... 10<br>CHURCH ..... 11<br><br>OTHER ..... 96<br>DOES NOT KNOW ... 98 |
| 124B | CHECK 124A. THE NET WAS OBTAINED THROUGH THE CAMPAIGN?                                                                    | CODE '10' CIRCLED<br><input type="checkbox"/><br><br>CODE '10' NOT CIRCLED<br><input type="checkbox"/><br><br>(SKIP TO 125) ←                                                                                                                                                                                                                                                                                      | CODE '10' CIRCLED<br><input type="checkbox"/><br><br>CODE '10' NOT CIRCLED<br><input type="checkbox"/><br><br>(SKIP TO 125) ←                                                                                                                                                                                                                                                                                      | CODE '10' CIRCLED<br><input type="checkbox"/><br><br>CODE '10' NOT CIRCLED<br><input type="checkbox"/><br><br>(SKIP TO 125) ←                                                                                                                                                                                                                                                                                      |
| 124C | What is the campaign's date?                                                                                              | DAY ..... <input type="text"/> <input type="text"/><br>MONTH ..... <input type="text"/> <input type="text"/><br>YEAR <input type="text"/> <input type="text"/> <input type="text"/> <input type="text"/><br>DON'T KNOW ..... 98                                                                                                                                                                                    | DAY ..... <input type="text"/> <input type="text"/><br>MONTH ..... <input type="text"/> <input type="text"/><br>YEAR <input type="text"/> <input type="text"/> <input type="text"/> <input type="text"/><br>DON'T KNOW ..... 98                                                                                                                                                                                    | DAY ..... <input type="text"/> <input type="text"/><br>MONTH ..... <input type="text"/> <input type="text"/><br>YEAR <input type="text"/> <input type="text"/> <input type="text"/> <input type="text"/><br>DON'T KNOW ..... 98                                                                                                                                                                                    |

|      |                                                                                                                                                                      | NET #1                                                                                                                                                                                                                                                                                  | NET #2                                                                                                                                                                                                                                                                                  | NET #3                                                                                                                                                                                                                                                                                  |
|------|----------------------------------------------------------------------------------------------------------------------------------------------------------------------|-----------------------------------------------------------------------------------------------------------------------------------------------------------------------------------------------------------------------------------------------------------------------------------------|-----------------------------------------------------------------------------------------------------------------------------------------------------------------------------------------------------------------------------------------------------------------------------------------|-----------------------------------------------------------------------------------------------------------------------------------------------------------------------------------------------------------------------------------------------------------------------------------------|
| 125  | OBSERVE OR ASK THE BRAND/<br>TYPE OF MOSQUITO NET.<br><br>IF BRAND IS UNKNOWN AND<br>YOU CANNOT OBSERVE THE<br><br>NET, SHOW PICTURES OF<br>TYPICAL NET TYPES/BRANDS | LONG-LASTING<br>INSECTICIDE-<br>TREATED NET (LLIN)<br>PERMANET ..... 11<br>DURANET ..... 12<br>INTERCEPTOR ..13<br>NETPROTECT ..14<br>OLYSET ..... 15<br>DAWNET ..... 16<br>ICONLIFE ..... 17<br>YORKOOL ..... 18<br>DK BRAND ..... 19<br>OTHER_____ 20<br>(SPECIFY)<br>(SKIP TO 128) ← | LONG-LASTING<br>INSECTICIDE-<br>TREATED NET (LLIN)<br>PERMANET ..... 11<br>DURANET ..... 12<br>INTERCEPTOR ..13<br>NETPROTECT ..14<br>OLYSET ..... 15<br>DAWNET ..... 16<br>ICONLIFE ..... 17<br>YORKOOL ..... 18<br>DK BRAND ..... 19<br>OTHER_____ 20<br>(SPECIFY)<br>(SKIP TO 128) ← | LONG-LASTING<br>INSECTICIDE-<br>TREATED NET (LLIN)<br>PERMANET ..... 11<br>DURANET ..... 12<br>INTERCEPTOR ..13<br>NETPROTECT ..14<br>OLYSET ..... 15<br>DAWNET ..... 16<br>ICONLIFE ..... 17<br>YORKOOL ..... 18<br>DK BRAND ..... 19<br>OTHER_____ 20<br>(SPECIFY)<br>(SKIP TO 128) ← |
| 126  | Since you got the net, was it ever<br>soaked or dipped in a liquid to kill or<br>repel mosquitoes?                                                                   | YES ..... 1<br>NO ..... 2<br>(SKIP TO 128) ←<br>NOT SURE ..... 8                                                                                                                                                                                                                        | YES ..... 1<br>NO ..... 2<br>(SKIP TO 128) ←<br>NOT SURE ..... 8                                                                                                                                                                                                                        | YES ..... 1<br>NO ..... 2<br>(SKIP TO 128) ←<br>NOT SURE ..... 8                                                                                                                                                                                                                        |
| 127  | How many months ago was the net<br>last soaked or dipped?<br><br>IF LESS THAN ONE MONTH AGO,<br>RECORD '00'.                                                         | MONTHS <input type="text"/> <input type="text"/><br>AGO ...<br><br>MORE THAN 24<br>MONTHS AGO... 95<br><br>NOT SURE ..... 98                                                                                                                                                            | MONTHS <input type="text"/> <input type="text"/><br>AGO ...<br><br>MORE THAN 24<br>MONTHS AGO... 95<br><br>NOT SURE ..... 98                                                                                                                                                            | MONTHS <input type="text"/> <input type="text"/><br>AGO ...<br><br>MORE THAN 24<br>MONTHS AGO... 95<br><br>NOT SURE ..... 98                                                                                                                                                            |
| 128  | Did anyone sleep under this<br>mosquito net last night?                                                                                                              | YES ..... 1<br>(SKIP TO 129) ←<br>NO ..... 2<br>NOT SURE ..... 8<br>(SKIP TO 130) ←                                                                                                                                                                                                     | YES ..... 1<br>(SKIP TO 129) ←<br>NO ..... 2<br>NOT SURE ..... 8<br>(SKIP TO 130) ←                                                                                                                                                                                                     | YES ..... 1<br>(SKIP TO 129) ←<br>NO ..... 2<br>NOT SURE ..... 8<br>(SKIP TO 130) ←                                                                                                                                                                                                     |
| 128A | What are some of the reasons why<br>this net was not used?                                                                                                           | TOO HOT ..... A<br>DONT LIKE SMELL.. B<br>NO MOSQUITOES.. C<br>NET TOO OLD/TOO<br>MANY HOLES .. D<br>NET NOT HUNG .. E<br>OTHER_____ X<br>(SPECIFY)<br>DONT KNOW ..... Z<br>(ALL SKIP TO 130) ←                                                                                         | TOO HOT ..... A<br>DONT LIKE SMELL.. B<br>NO MOSQUITOES.. C<br>NET TOO OLD/TOO<br>MANY HOLES .. D<br>NET NOT HUNG .. E<br>OTHER_____ X<br>(SPECIFY)<br>DONT KNOW ..... Z<br>(ALL SKIP TO 130) ←                                                                                         | TOO HOT ..... A<br>DONT LIKE SMELL.. B<br>NO MOSQUITOES.. C<br>NET TOO OLD/TOO<br>MANY HOLES .. D<br>NET NOT HUNG .. E<br>OTHER_____ X<br>(SPECIFY)<br>DONT KNOW ..... Z<br>(ALL SKIP TO 130) ←                                                                                         |

|     |                                                                                                                            | NET #1                                                                                                           | NET #2                                                       | NET #3                                                                            |
|-----|----------------------------------------------------------------------------------------------------------------------------|------------------------------------------------------------------------------------------------------------------|--------------------------------------------------------------|-----------------------------------------------------------------------------------|
| 129 | Who slept under this mosquito net last night?<br><br>RECORD THE PERSON'S NAME AND LINE NUMBER FROM THE HOUSEHOLD SCHEDULE. | NAME _____                                                                                                       | NAME _____                                                   | NAME _____                                                                        |
|     |                                                                                                                            | LINE NO. .... <input type="text"/> <input type="text"/>                                                          | LINE NO. .... <input type="text"/> <input type="text"/>      | LINE NO. .... <input type="text"/> <input type="text"/>                           |
|     |                                                                                                                            | NAME _____                                                                                                       | NAME _____                                                   | NAME _____                                                                        |
|     |                                                                                                                            | LINE NO. .... <input type="text"/> <input type="text"/>                                                          | LINE NO. .... <input type="text"/> <input type="text"/>      | LINE NO. .... <input type="text"/> <input type="text"/>                           |
|     |                                                                                                                            | NAME _____                                                                                                       | NAME _____                                                   | NAME _____                                                                        |
|     |                                                                                                                            | LINE NO. .... <input type="text"/> <input type="text"/>                                                          | LINE NO. .... <input type="text"/> <input type="text"/>      | LINE NO. .... <input type="text"/> <input type="text"/>                           |
|     |                                                                                                                            | NAME _____                                                                                                       | NAME _____                                                   | NAME _____                                                                        |
|     |                                                                                                                            | LINE NO. .... <input type="text"/> <input type="text"/>                                                          | LINE NO. .... <input type="text"/> <input type="text"/>      | LINE NO. .... <input type="text"/> <input type="text"/>                           |
| 130 |                                                                                                                            | GO BACK TO 123 FOR NEXT NET; OR, IF NO MORE NETS, GO TO 131.                                                     | GO BACK TO 123 FOR NEXT NET; OR, IF NO MORE NETS, GO TO 131. | GO TO 123 IN FIRST COLUMN OF A NEW QUESTIONNAIRE; OR, IF NO MORE NETS, GO TO 131. |
| 131 | RECORD THE TIME                                                                                                            | HOURS ..... <input type="text"/> <input type="text"/><br>MINUTES ..... <input type="text"/> <input type="text"/> |                                                              |                                                                                   |

**HEMOGLOBIN MEASUREMENT AND MALARIA TESTING FOR CHILDREN AGE 0-5**

|     |                                                                                                                                                                                        |                                                                                                                                                                                                                                                                                                                                                                                                                                                                                                                                                                                                                                                                                                                                                                                                                                                                                                                                                                                                                |                                                                                                 |                                                                                                 |
|-----|----------------------------------------------------------------------------------------------------------------------------------------------------------------------------------------|----------------------------------------------------------------------------------------------------------------------------------------------------------------------------------------------------------------------------------------------------------------------------------------------------------------------------------------------------------------------------------------------------------------------------------------------------------------------------------------------------------------------------------------------------------------------------------------------------------------------------------------------------------------------------------------------------------------------------------------------------------------------------------------------------------------------------------------------------------------------------------------------------------------------------------------------------------------------------------------------------------------|-------------------------------------------------------------------------------------------------|-------------------------------------------------------------------------------------------------|
| 201 | CHECK COLUMN 9 IN HOUSEHOLD SCHEDULE. RECORD THE LINE NUMBER AND NAME FOR ALL ELIGIBLE CHILDREN 0-5 YEARS IN QUESTION 202. IF MORE THAN SIX CHILDREN, USE ADDITIONAL QUESTIONNAIRE(S). |                                                                                                                                                                                                                                                                                                                                                                                                                                                                                                                                                                                                                                                                                                                                                                                                                                                                                                                                                                                                                |                                                                                                 |                                                                                                 |
|     |                                                                                                                                                                                        | CHILD 1                                                                                                                                                                                                                                                                                                                                                                                                                                                                                                                                                                                                                                                                                                                                                                                                                                                                                                                                                                                                        | CHILD 2                                                                                         | CHILD 3                                                                                         |
| 202 | LINE NUMBER FROM COLUMN 9<br><br>NAME FROM COLUMN 2                                                                                                                                    | LINE NUMBER ..... <input type="text"/><br>NAME _____                                                                                                                                                                                                                                                                                                                                                                                                                                                                                                                                                                                                                                                                                                                                                                                                                                                                                                                                                           | LINE NUMBER ..... <input type="text"/><br>NAME _____                                            | LINE NUMBER ..... <input type="text"/><br>NAME _____                                            |
| 203 | IF MOTHER INTERVIEWED, COPY MONTH AND YEAR OF BIRTH FROM BIRTH HISTORY AND ASK DAY; IF MOTHER NOT INTERVIEWED, ASK:<br>What is (NAME'S) birth date?                                    | DAY ..... <input type="text"/><br>MONTH ..... <input type="text"/><br>YEAR <input type="text"/>                                                                                                                                                                                                                                                                                                                                                                                                                                                                                                                                                                                                                                                                                                                                                                                                                                                                                                                | DAY ..... <input type="text"/><br>MONTH ..... <input type="text"/><br>YEAR <input type="text"/> | DAY ..... <input type="text"/><br>MONTH ..... <input type="text"/><br>YEAR <input type="text"/> |
| 204 | CHECK 203:<br>CHILD BORN IN JANUARY 2009 OR LATER?                                                                                                                                     | YES ..... 1<br>NO ..... 2<br>(GO TO 203 FOR NEXT CHILD OR, IF NO MORE CHILDREN, END INTERVIEW)                                                                                                                                                                                                                                                                                                                                                                                                                                                                                                                                                                                                                                                                                                                                                                                                                                                                                                                 | YES ..... 1<br>NO ..... 2<br>(GO TO 203 FOR NEXT CHILD OR, IF NO MORE CHILDREN, END INTERVIEW)  | YES ..... 1<br>NO ..... 2<br>(GO TO 203 FOR NEXT CHILD OR, IF NO MORE CHILDREN, END INTERVIEW)  |
| 206 | LINE NUMBER OF PARENT/ OTHER ADULT RESPONSIBLE FOR THE CHILD (FROM COLUMN 1 OF HOUSEHOLD SCHEDULE). RECORD '00' IF NOT LISTED.                                                         | LINE NUMBER ..... <input type="text"/>                                                                                                                                                                                                                                                                                                                                                                                                                                                                                                                                                                                                                                                                                                                                                                                                                                                                                                                                                                         | LINE NUMBER ..... <input type="text"/>                                                          | LINE NUMBER ..... <input type="text"/>                                                          |
| 207 | ASK CONSENT FOR ANEMIA TEST FROM PARENT/OTHER ADULT IDENTIFIED IN 206 AS RESPONSIBLE FOR CHILD.                                                                                        | <p>As part of this survey, we are asking children all over the country to take an anemia test. Anemia is a serious health problem that usually results from poor nutrition, infection, or chronic disease. This survey will assist the government to develop programs to prevent and treat anemia. We ask that all children born in 2009 or later take part in anemia testing in this survey and give a few drops of blood from a finger or heel. The equipment used to take the blood is clean and completely safe. It has never been used before and will be thrown away after each test. The blood will be tested for anemia immediately, and the result will be told to you right away. The result will be kept strictly confidential and will not be shared with anyone other than members of our survey team.</p> <p>Do you have any questions?<br/>You can say yes to the test, or you can say no. It is up to you to decide.<br/>Will you allow (NAME OF CHILD) to participate in the anemia test?</p> |                                                                                                 |                                                                                                 |
| 208 | CIRCLE THE APPROPRIATE CODE AND SIGN YOUR NAME.                                                                                                                                        | GRANTED ..... 1<br>_____ (SIGN) ←  <br>REFUSED ..... 2<br>NOT PRESENT ..... 5<br>OTHER ..... 6                                                                                                                                                                                                                                                                                                                                                                                                                                                                                                                                                                                                                                                                                                                                                                                                                                                                                                                 | GRANTED ..... 1<br>_____ (SIGN) ←  <br>REFUSED ..... 2<br>NOT PRESENT ..... 5<br>OTHER ..... 6  | GRANTED ..... 1<br>_____ (SIGN) ←  <br>REFUSED ..... 2<br>NOT PRESENT ..... 5<br>OTHER ..... 6  |

|     |                                                                                                                       | CHILD 1                                                                                                                                                                                                                                                                                                                                                                                                                                                                                                                                                                                                                                                                                                                                                                                                                                                                                                                                                                                                                                                                                                                                                                                                                                                                        | CHILD 2                                                                                                                                                                                                                                                                                                                                             | CHILD 3                                                                                                                                                                                                                                                                                                                                             |
|-----|-----------------------------------------------------------------------------------------------------------------------|--------------------------------------------------------------------------------------------------------------------------------------------------------------------------------------------------------------------------------------------------------------------------------------------------------------------------------------------------------------------------------------------------------------------------------------------------------------------------------------------------------------------------------------------------------------------------------------------------------------------------------------------------------------------------------------------------------------------------------------------------------------------------------------------------------------------------------------------------------------------------------------------------------------------------------------------------------------------------------------------------------------------------------------------------------------------------------------------------------------------------------------------------------------------------------------------------------------------------------------------------------------------------------|-----------------------------------------------------------------------------------------------------------------------------------------------------------------------------------------------------------------------------------------------------------------------------------------------------------------------------------------------------|-----------------------------------------------------------------------------------------------------------------------------------------------------------------------------------------------------------------------------------------------------------------------------------------------------------------------------------------------------|
|     | NAME FROM COLUMN 2                                                                                                    | NAME _____                                                                                                                                                                                                                                                                                                                                                                                                                                                                                                                                                                                                                                                                                                                                                                                                                                                                                                                                                                                                                                                                                                                                                                                                                                                                     | NAME _____                                                                                                                                                                                                                                                                                                                                          | NAME _____                                                                                                                                                                                                                                                                                                                                          |
| 209 | ASK CONSENT FOR MALARIA TEST FROM PARENT/OTHER ADULT IDENTIFIED IN 206 AS RESPONSIBLE FOR CHILD.                      | <p>As part of this survey, we are asking that children all over the country take a test to see if they have malaria. Malaria is a serious illness caused by a parasite transmitted by a mosquito bite. This survey will help the government to develop programs to prevent malaria.</p> <p>We ask that all children born in 2009 or later take part in malaria testing in this survey and give a few drops of blood from a finger or heel. The equipment used to take the blood is clean and completely safe. It has never been used before and will be thrown away after each test. (We will use blood from the same finger or heel prick made for the anemia test). One blood drop will be tested for malaria immediately, and the result will be told to you right away. A few blood drops will be collected on a slide(s) and taken to a laboratory for testing. You will not be told the results of the laboratory testing. All results will be kept strictly confidential and will not be shared with anyone other than members of our survey team.</p> <p>Do you have any questions?<br/>           You can say yes to the test, or you can say no. It is up to you to decide.<br/>           Will you allow (NAME OF CHILD) to participate in the malaria testing?</p> |                                                                                                                                                                                                                                                                                                                                                     |                                                                                                                                                                                                                                                                                                                                                     |
| 210 | CIRCLE THE APPROPRIATE CODE AND SIGN YOUR NAME.                                                                       | GRANTED ..... 1<br>_____ ←  <br>(SIGN)<br>REFUSED ..... 2<br>NOT PRESENT ..... 5<br>OTHER ..... 6                                                                                                                                                                                                                                                                                                                                                                                                                                                                                                                                                                                                                                                                                                                                                                                                                                                                                                                                                                                                                                                                                                                                                                              | GRANTED ..... 1<br>_____ ←  <br>(SIGN)<br>REFUSED ..... 2<br>NOT PRESENT ..... 5<br>OTHER ..... 6                                                                                                                                                                                                                                                   | GRANTED ..... 1<br>_____ ←  <br>(SIGN)<br>REFUSED ..... 2<br>NOT PRESENT ..... 5<br>OTHER ..... 6                                                                                                                                                                                                                                                   |
| 211 | PREPARE EQUIPMENT AND SUPPLIES ONLY FOR THE TEST(S) FOR WHICH CONSENT HAS BEEN OBTAINED AND PROCEED WITH THE TEST(S). |                                                                                                                                                                                                                                                                                                                                                                                                                                                                                                                                                                                                                                                                                                                                                                                                                                                                                                                                                                                                                                                                                                                                                                                                                                                                                |                                                                                                                                                                                                                                                                                                                                                     |                                                                                                                                                                                                                                                                                                                                                     |
| 212 | BAR CODE LABEL FOR MALARIA TEST                                                                                       | <div style="border: 1px dashed black; padding: 5px; text-align: center;">           PUT THE 1ST BAR CODE LABEL HERE.         </div> NOT PRESENT ..... 9994<br>REFUSED ..... 9995<br>OTHER ..... 9996<br><br>PUT THE 2ND BAR CODE ON THE RDT, THE 3RD ON THE THICK SMEAR SLIDE, THE 4TH ON THE THIN SMEAR SLIDE AND THE 5TH ON THE TRANSMITTAL FORM.                                                                                                                                                                                                                                                                                                                                                                                                                                                                                                                                                                                                                                                                                                                                                                                                                                                                                                                            | <div style="border: 1px dashed black; padding: 5px; text-align: center;">           PUT THE 1ST BAR CODE LABEL HERE.         </div> NOT PRESENT ..... 9994<br>REFUSED ..... 9995<br>OTHER ..... 9996<br><br>PUT THE 2ND BAR CODE ON THE RDT, THE 3RD ON THE THICK SMEAR SLIDE, THE 4TH ON THE THIN SMEAR SLIDE AND THE 5TH ON THE TRANSMITTAL FORM. | <div style="border: 1px dashed black; padding: 5px; text-align: center;">           PUT THE 1ST BAR CODE LABEL HERE.         </div> NOT PRESENT ..... 9994<br>REFUSED ..... 9995<br>OTHER ..... 9996<br><br>PUT THE 2ND BAR CODE ON THE RDT, THE 3RD ON THE THICK SMEAR SLIDE, THE 4TH ON THE THIN SMEAR SLIDE AND THE 5TH ON THE TRANSMITTAL FORM. |
| 213 | RECORD HEMOGLOBIN LEVEL HERE AND IN THE ANEMIA AND MALARIA BROCHURE.                                                  | G/DL <input type="text"/> <input type="text"/> <input type="text"/><br>NOT PRESENT ..... 994<br>REFUSED ..... 995<br>OTHER ..... 996                                                                                                                                                                                                                                                                                                                                                                                                                                                                                                                                                                                                                                                                                                                                                                                                                                                                                                                                                                                                                                                                                                                                           | G/DL <input type="text"/> <input type="text"/> <input type="text"/><br>NOT PRESENT ..... 994<br>REFUSED ..... 995<br>OTHER ..... 996                                                                                                                                                                                                                | G/DL <input type="text"/> <input type="text"/> <input type="text"/><br>NOT PRESENT ..... 994<br>REFUSED ..... 995<br>OTHER ..... 996                                                                                                                                                                                                                |
| 214 | RECORD RESULT CODE OF THE MALARIA RDT.                                                                                | TESTED ..... 1<br>NOT PRESENT ..... 2<br>REFUSED ..... 3<br>OTHER ..... 6<br>(SKIP TO 216) ←                                                                                                                                                                                                                                                                                                                                                                                                                                                                                                                                                                                                                                                                                                                                                                                                                                                                                                                                                                                                                                                                                                                                                                                   | TESTED ..... 1<br>NOT PRESENT ..... 2<br>REFUSED ..... 3<br>OTHER ..... 6<br>(SKIP TO 216) ←                                                                                                                                                                                                                                                        | TESTED ..... 1<br>NOT PRESENT ..... 2<br>REFUSED ..... 3<br>OTHER ..... 6<br>(SKIP TO 216) ←                                                                                                                                                                                                                                                        |
| 215 | RECORD THE RESULT OF THE MALARIA RDT HERE AND IN THE ANEMIA AND MALARIA BROCHURE.                                     | POSITIVE ..... 1<br>(SKIP TO 218) ←<br>NEGATIVE ..... 2<br>OTHER ..... 6                                                                                                                                                                                                                                                                                                                                                                                                                                                                                                                                                                                                                                                                                                                                                                                                                                                                                                                                                                                                                                                                                                                                                                                                       | POSITIVE ..... 1<br>(SKIP TO 218) ←<br>NEGATIVE ..... 2<br>OTHER ..... 6                                                                                                                                                                                                                                                                            | POSITIVE ..... 1<br>(SKIP TO 218) ←<br>NEGATIVE ..... 2<br>OTHER ..... 6                                                                                                                                                                                                                                                                            |
| 216 | CHECK 213: HEMOGLOBIN RESULT                                                                                          | BELOW 8.0 G/DL, SEVERE ANEMIA ..... 1<br>8.0 G/DL OR ABOVE ..... 2<br>NOT PRESENT ..... 4<br>REFUSED ..... 5<br>OTHER ..... 6<br>(SKIP TO 229) ←                                                                                                                                                                                                                                                                                                                                                                                                                                                                                                                                                                                                                                                                                                                                                                                                                                                                                                                                                                                                                                                                                                                               | BELOW 8.0 G/DL, SEVERE ANEMIA ..... 1<br>8.0 G/DL OR ABOVE ..... 2<br>NOT PRESENT ..... 4<br>REFUSED ..... 5<br>OTHER ..... 6<br>(SKIP TO 229) ←                                                                                                                                                                                                    | BELOW 8.0 G/DL, SEVERE ANEMIA ..... 1<br>8.0 G/DL OR ABOVE ..... 2<br>NOT PRESENT ..... 4<br>REFUSED ..... 5<br>OTHER ..... 6<br>(SKIP TO 229) ←                                                                                                                                                                                                    |

|     |                                                                                                                                                                                                                                                                                                                                                  | CHILD 1                                                                                                                                                                                                                                                                                                                                                                   | CHILD 2                                                                                                                                                                                                                                                                | CHILD 3                                                                                                                                                                                                                                                                |
|-----|--------------------------------------------------------------------------------------------------------------------------------------------------------------------------------------------------------------------------------------------------------------------------------------------------------------------------------------------------|---------------------------------------------------------------------------------------------------------------------------------------------------------------------------------------------------------------------------------------------------------------------------------------------------------------------------------------------------------------------------|------------------------------------------------------------------------------------------------------------------------------------------------------------------------------------------------------------------------------------------------------------------------|------------------------------------------------------------------------------------------------------------------------------------------------------------------------------------------------------------------------------------------------------------------------|
|     | NAME FROM COLUMN 2                                                                                                                                                                                                                                                                                                                               | NAME _____                                                                                                                                                                                                                                                                                                                                                                | NAME _____                                                                                                                                                                                                                                                             | NAME _____                                                                                                                                                                                                                                                             |
| 217 | <b><u>SEVERE ANEMIA REFERRAL STATEMENT</u></b>                                                                                                                                                                                                                                                                                                   | The anemia test shows that (NAME OF CHILD) has severe anemia. Your child is very ill and must be taken to a health facility immediately.<br><br>SKIP TO 229                                                                                                                                                                                                               |                                                                                                                                                                                                                                                                        |                                                                                                                                                                                                                                                                        |
| 218 | Does (NAME) suffer from the any of following illnesses or symptoms:<br><br>a) Extreme weakness?<br>b) Heart problems?<br>c) Loss of consciousness?<br>d) Rapid or difficult breathing?<br><br>e) Seizures?<br>f) Abnormal bleeding?<br><br>g) Jaundice or yellow skin?<br><br>h) Dark urine?<br><br>IF NONE OF THE ABOVE SYMPTOMS, CIRCLE CODE Y | EXTREME WEAKNESS . A<br>HEART PROBLEMS . . . B<br>LOSS OF<br>CONSCIOUSNESS . . C<br>RAPID BREATHING . . . D<br><br>SEIZURES . . . . . E<br>BLEEDING . . . . . F<br><br>JAUNDICE . . . . . G<br><br>DARK URINE . . . . . H<br><br>NONE OF ABOVE<br>SYMPTOMS . . . . . Y                                                                                                    | EXTREME WEAKNESS . A<br>HEART PROBLEMS . . . B<br>LOSS OF<br>CONSCIOUSNESS . . C<br>RAPID BREATHING . . . D<br><br>SEIZURES . . . . . E<br>BLEEDING . . . . . F<br><br>JAUNDICE . . . . . G<br><br>DARK URINE . . . . . H<br><br>NONE OF ABOVE<br>SYMPTOMS . . . . . Y | EXTREME WEAKNESS . A<br>HEART PROBLEMS . . . B<br>LOSS OF<br>CONSCIOUSNESS . . C<br>RAPID BREATHING . . . D<br><br>SEIZURES . . . . . E<br>BLEEDING . . . . . F<br><br>JAUNDICE . . . . . G<br><br>DARK URINE . . . . . H<br><br>NONE OF ABOVE<br>SYMPTOMS . . . . . Y |
| 219 | CHECK 218:<br><br>ANY CODE A-H CIRCLED?                                                                                                                                                                                                                                                                                                          | ONLY CODE Y<br>CIRCLED . . . . . 1<br>ANY CODE<br>A-H CIRCLED . . . . 2<br>(SKIP TO 222) ↙                                                                                                                                                                                                                                                                                | ONLY CODE Y<br>CIRCLED . . . . . 1<br>ANY CODE<br>A-H CIRCLED . . . . 2<br>(SKIP TO 222) ↙                                                                                                                                                                             | ONLY CODE Y<br>CIRCLED . . . . . 1<br>ANY CODE<br>A-H CIRCLED . . . . 2<br>(SKIP TO 222) ↙                                                                                                                                                                             |
| 220 | CHECK 213:<br><br>HEMOGLOBIN RESULT                                                                                                                                                                                                                                                                                                              | BELOW 8.0 G/DL,<br>SEVERE ANEMIA . . . . 1<br>(SKIP TO 222) ↙<br>8.0 G/DL OR ABOVE . . 2<br>NOT PRESENT . . . . . 4<br>REFUSED . . . . . 5<br>OTHER . . . . . 6                                                                                                                                                                                                           | BELOW 8.0 G/DL,<br>SEVERE ANEMIA . . . . 1<br>(SKIP TO 222) ↙<br>8.0 G/DL OR ABOVE . . 2<br>NOT PRESENT . . . . . 4<br>REFUSED . . . . . 5<br>OTHER . . . . . 6                                                                                                        | BELOW 8.0 G/DL,<br>SEVERE ANEMIA . . . . 1<br>(SKIP TO 222) ↙<br>8.0 G/DL OR ABOVE . . 2<br>NOT PRESENT . . . . . 4<br>REFUSED . . . . . 5<br>OTHER . . . . . 6                                                                                                        |
| 221 | In the past two weeks has (NAME) taken or is taking COARTEM/ACT given by a doctor or health center to treat the malaria?<br><br>VERIFY BY ASKING TO SEE TREATMENT.                                                                                                                                                                               | YES . . . . . 1<br>(SKIP TO 223) ↙<br><br>NO . . . . . 2<br>(SKIP TO 223A) ↙                                                                                                                                                                                                                                                                                              | YES . . . . . 1<br>(SKIP TO 223) ↙<br><br>NO . . . . . 2<br>(SKIP TO 223A) ↙                                                                                                                                                                                           | YES . . . . . 1<br>(SKIP TO 223) ↙<br><br>NO . . . . . 2<br>(SKIP TO 223A) ↙                                                                                                                                                                                           |
| 222 | <b><u>SEVERE MALARIA REFERRAL STATEMENT</u></b>                                                                                                                                                                                                                                                                                                  | The malaria test shows that (NAME OF CHILD) has malaria. Your child also has symptoms of severe malaria. The malaria treatment I have will not help your child, and I cannot give you the medication. Your child is very ill and must be taken to a health facility right away.<br><br>SKIP TO 228                                                                        |                                                                                                                                                                                                                                                                        |                                                                                                                                                                                                                                                                        |
| 223 | <b><u>ALREADY TAKING [FIRST LINE MEDICATION] REFERRAL STATEMENT</u></b>                                                                                                                                                                                                                                                                          | You have told me that (NAME OF CHILD) has already received COARTEM/ACT for malaria. Therefore, I cannot give you additional COARTEM/ACT. However, the test shows that he/she has malaria. If your child has a fever for two days after the last dose of COARTEM/ACT, you should take the child to the nearest health facility for further examination.<br><br>SKIP TO 228 |                                                                                                                                                                                                                                                                        |                                                                                                                                                                                                                                                                        |

|                                                 |                                                                                                                                  | CHILD 1                                                                                                                                                                                                                                                                                                                                                                                                                                                                                                                                                                                                                                                                                                                                                                                                                                                                                                                                                                                                                                                                                                                                                                                                                                                                                                                                                                                                                     | CHILD 2                                                                                                                                                                                | CHILD 3                                                                                                                                                                                |                            |  |                                  |          |                |                          |                                                 |                                 |                                                 |                                  |
|-------------------------------------------------|----------------------------------------------------------------------------------------------------------------------------------|-----------------------------------------------------------------------------------------------------------------------------------------------------------------------------------------------------------------------------------------------------------------------------------------------------------------------------------------------------------------------------------------------------------------------------------------------------------------------------------------------------------------------------------------------------------------------------------------------------------------------------------------------------------------------------------------------------------------------------------------------------------------------------------------------------------------------------------------------------------------------------------------------------------------------------------------------------------------------------------------------------------------------------------------------------------------------------------------------------------------------------------------------------------------------------------------------------------------------------------------------------------------------------------------------------------------------------------------------------------------------------------------------------------------------------|----------------------------------------------------------------------------------------------------------------------------------------------------------------------------------------|----------------------------------------------------------------------------------------------------------------------------------------------------------------------------------------|----------------------------|--|----------------------------------|----------|----------------|--------------------------|-------------------------------------------------|---------------------------------|-------------------------------------------------|----------------------------------|
|                                                 | NAME FROM COLUMN 2                                                                                                               | NAME _____                                                                                                                                                                                                                                                                                                                                                                                                                                                                                                                                                                                                                                                                                                                                                                                                                                                                                                                                                                                                                                                                                                                                                                                                                                                                                                                                                                                                                  | NAME _____                                                                                                                                                                             | NAME _____                                                                                                                                                                             |                            |  |                                  |          |                |                          |                                                 |                                 |                                                 |                                  |
| 223A                                            | CHECK 203:<br>IS CHILD AGE 0-3 MONTHS, I.E.,<br>WAS CHILD BORN IN MONTH OF<br>INTERVIEW OR THREE PREVIOUS<br>MONTHS?             | 0-3 MONTHS ..... 1<br><br>OLDER ..... 2<br>SKIP TO 224 ←                                                                                                                                                                                                                                                                                                                                                                                                                                                                                                                                                                                                                                                                                                                                                                                                                                                                                                                                                                                                                                                                                                                                                                                                                                                                                                                                                                    | 0-3 MONTHS ..... 1<br><br>OLDER ..... 2<br>SKIP TO 224 ←                                                                                                                               | 0-3 MONTHS ..... 1<br><br>OLDER ..... 2<br>SKIP TO 224 ←                                                                                                                               |                            |  |                                  |          |                |                          |                                                 |                                 |                                                 |                                  |
| 223B                                            | <b><u>UNDER 4 MONTHS MALARIA<br/>REFERRAL STATEMENT</u></b>                                                                      | The malaria test shows that (NAME OF CHILD) has malaria. Your child is also younger than 4 months old and therefore requires special treatment from a health facility. Your child is ill and must be taken to a health facility right away.<br><br>SKIP TO 228                                                                                                                                                                                                                                                                                                                                                                                                                                                                                                                                                                                                                                                                                                                                                                                                                                                                                                                                                                                                                                                                                                                                                              |                                                                                                                                                                                        |                                                                                                                                                                                        |                            |  |                                  |          |                |                          |                                                 |                                 |                                                 |                                  |
| 224                                             | READ INFORMATION FOR<br>MALARIA TREATMENT AND<br>CONSENT STATEMENT TO<br>PARENT OR OTHER ADULT<br>RESPONSIBLE FOR THE CHILD.     | The malaria test shows that your child has malaria. We can give you free medicine. The medicine is called COARTEM/ACT. COARTEM/ACT is very effective and in a few days it should get rid of the fever and other symptoms. You do not have to give the child the medicine. This is up to you. Please tell me whether you accept the medicine or not.                                                                                                                                                                                                                                                                                                                                                                                                                                                                                                                                                                                                                                                                                                                                                                                                                                                                                                                                                                                                                                                                         |                                                                                                                                                                                        |                                                                                                                                                                                        |                            |  |                                  |          |                |                          |                                                 |                                 |                                                 |                                  |
| 225                                             | CIRCLE THE APPROPRIATE<br>CODE AND SIGN YOUR NAME.                                                                               | ACCEPTED MEDICINE .. 1<br><br>_____<br>(SIGN) ←<br>REFUSED ..... 2<br>OTHER ..... 6                                                                                                                                                                                                                                                                                                                                                                                                                                                                                                                                                                                                                                                                                                                                                                                                                                                                                                                                                                                                                                                                                                                                                                                                                                                                                                                                         | ACCEPTED MEDICINE .. 1<br><br>_____<br>(SIGN) ←<br>REFUSED ..... 2<br>OTHER ..... 6                                                                                                    | ACCEPTED MEDICINE .. 1<br><br>_____<br>(SIGN) ←<br>REFUSED ..... 2<br>OTHER ..... 6                                                                                                    |                            |  |                                  |          |                |                          |                                                 |                                 |                                                 |                                  |
| 226                                             | CHECK 225:<br><br>MEDICATION ACCEPTED                                                                                            | ACCEPTED MEDICINE .. 1<br>REFUSED ..... 2<br>OTHER ..... 6<br>(SKIP TO 228) ←                                                                                                                                                                                                                                                                                                                                                                                                                                                                                                                                                                                                                                                                                                                                                                                                                                                                                                                                                                                                                                                                                                                                                                                                                                                                                                                                               | ACCEPTED MEDICINE .. 1<br>REFUSED ..... 2<br>OTHER ..... 6<br>(SKIP TO 228) ←                                                                                                          | ACCEPTED MEDICINE .. 1<br>REFUSED ..... 2<br>OTHER ..... 6<br>(SKIP TO 228) ←                                                                                                          |                            |  |                                  |          |                |                          |                                                 |                                 |                                                 |                                  |
| 227                                             | TREATMENT FOR CHILDREN<br>WITH POSITIVE MALARIA TESTS                                                                            | <table border="1"> <thead> <tr> <th colspan="2">TREATMENT WITH COARTEM/ACT</th> </tr> <tr> <th>Weight (in Kg) – Approximate age</th> <th>Dosage *</th> </tr> </thead> <tbody> <tr> <td>Under 4 months</td> <td>Refer to health facility</td> </tr> <tr> <td>5 kgs. to 14 kgs. (from 4 months up to 3 years)</td> <td>1 tablet twice daily for 3 days</td> </tr> <tr> <td>15 kgs. to 24 kgs. (from 3 years up to 7 years)</td> <td>2 tablets twice daily for 3 days</td> </tr> </tbody> </table> <p>* Co-formulated tablets containing 20 mg Artemether and 120 mg Lumefantrine per tablet</p> <p>First day starts by taking first dose followed by the second one 8 hours later; on subsequent days the recommendation is simply “morning” and “evening” (usually around 12 hours apart). Take the medicine (crushed for smaller children) with high fat food or drinks like milk.</p> <p>Make sure that the FULL 3 days treatment is taken at the recommended times, otherwise the infection may return. If your child vomits within an hour of taking the medicine, you will need to get additional tablets and repeat the dose.</p> <p>ALSO TELL THE PARENT/ADULT RESPONSIBLE FOR THE CHILD: If [NAME] has a high fever, fast or difficult breathing, is not able to drink or breastfeed, gets sicker or does not get better in two days, you should take him/her to a health professional for treatment right away.</p> |                                                                                                                                                                                        |                                                                                                                                                                                        | TREATMENT WITH COARTEM/ACT |  | Weight (in Kg) – Approximate age | Dosage * | Under 4 months | Refer to health facility | 5 kgs. to 14 kgs. (from 4 months up to 3 years) | 1 tablet twice daily for 3 days | 15 kgs. to 24 kgs. (from 3 years up to 7 years) | 2 tablets twice daily for 3 days |
| TREATMENT WITH COARTEM/ACT                      |                                                                                                                                  |                                                                                                                                                                                                                                                                                                                                                                                                                                                                                                                                                                                                                                                                                                                                                                                                                                                                                                                                                                                                                                                                                                                                                                                                                                                                                                                                                                                                                             |                                                                                                                                                                                        |                                                                                                                                                                                        |                            |  |                                  |          |                |                          |                                                 |                                 |                                                 |                                  |
| Weight (in Kg) – Approximate age                | Dosage *                                                                                                                         |                                                                                                                                                                                                                                                                                                                                                                                                                                                                                                                                                                                                                                                                                                                                                                                                                                                                                                                                                                                                                                                                                                                                                                                                                                                                                                                                                                                                                             |                                                                                                                                                                                        |                                                                                                                                                                                        |                            |  |                                  |          |                |                          |                                                 |                                 |                                                 |                                  |
| Under 4 months                                  | Refer to health facility                                                                                                         |                                                                                                                                                                                                                                                                                                                                                                                                                                                                                                                                                                                                                                                                                                                                                                                                                                                                                                                                                                                                                                                                                                                                                                                                                                                                                                                                                                                                                             |                                                                                                                                                                                        |                                                                                                                                                                                        |                            |  |                                  |          |                |                          |                                                 |                                 |                                                 |                                  |
| 5 kgs. to 14 kgs. (from 4 months up to 3 years) | 1 tablet twice daily for 3 days                                                                                                  |                                                                                                                                                                                                                                                                                                                                                                                                                                                                                                                                                                                                                                                                                                                                                                                                                                                                                                                                                                                                                                                                                                                                                                                                                                                                                                                                                                                                                             |                                                                                                                                                                                        |                                                                                                                                                                                        |                            |  |                                  |          |                |                          |                                                 |                                 |                                                 |                                  |
| 15 kgs. to 24 kgs. (from 3 years up to 7 years) | 2 tablets twice daily for 3 days                                                                                                 |                                                                                                                                                                                                                                                                                                                                                                                                                                                                                                                                                                                                                                                                                                                                                                                                                                                                                                                                                                                                                                                                                                                                                                                                                                                                                                                                                                                                                             |                                                                                                                                                                                        |                                                                                                                                                                                        |                            |  |                                  |          |                |                          |                                                 |                                 |                                                 |                                  |
| 228                                             | RECORD THE RESULT CODE OF<br><b><u>MALARIA TREATMENT OR<br/>REFERRAL.</u></b>                                                    | MEDICATION GIVEN ... 1<br>MEDS REFUSED ..... 2<br>SEVERE MALARIA<br>REFERRAL ..... 3<br>ALREADY TAKING ACTS<br>REFERRAL ..... 4<br>UNDER 4 MONTHS<br>REFERRAL ..... 5<br>OTHER ..... 6                                                                                                                                                                                                                                                                                                                                                                                                                                                                                                                                                                                                                                                                                                                                                                                                                                                                                                                                                                                                                                                                                                                                                                                                                                      | MEDICATION GIVEN ... 1<br>MEDS REFUSED ..... 2<br>SEVERE MALARIA<br>REFERRAL ..... 3<br>ALREADY TAKING ACTS<br>REFERRAL ..... 4<br>UNDER 4 MONTHS<br>REFERRAL ..... 5<br>OTHER ..... 6 | MEDICATION GIVEN ... 1<br>MEDS REFUSED ..... 2<br>SEVERE MALARIA<br>REFERRAL ..... 3<br>ALREADY TAKING ACTS<br>REFERRAL ..... 4<br>UNDER 4 MONTHS<br>REFERRAL ..... 5<br>OTHER ..... 6 |                            |  |                                  |          |                |                          |                                                 |                                 |                                                 |                                  |
| 229                                             | GO BACK TO 202 IN NEXT COLUMN OF THIS QUESTIONNAIRE OR IN THE FIRST COLUMN OF THE NEXT PAGE; IF NO MORE CHILDREN, END INTERVIEW. |                                                                                                                                                                                                                                                                                                                                                                                                                                                                                                                                                                                                                                                                                                                                                                                                                                                                                                                                                                                                                                                                                                                                                                                                                                                                                                                                                                                                                             |                                                                                                                                                                                        |                                                                                                                                                                                        |                            |  |                                  |          |                |                          |                                                 |                                 |                                                 |                                  |



**HEMOGLOBIN MEASUREMENT AND MALARIA TESTING FOR CHILDREN AGE 0-5**

|     |                                                                                                                                                                                        |                                                                                                                                                                                                                                                                                                                                                                                                                                                                                                                                                                                                                                                                                                                                                                                                                                                                                                                                                                                                                |                                                                                                 |                                                                                                 |
|-----|----------------------------------------------------------------------------------------------------------------------------------------------------------------------------------------|----------------------------------------------------------------------------------------------------------------------------------------------------------------------------------------------------------------------------------------------------------------------------------------------------------------------------------------------------------------------------------------------------------------------------------------------------------------------------------------------------------------------------------------------------------------------------------------------------------------------------------------------------------------------------------------------------------------------------------------------------------------------------------------------------------------------------------------------------------------------------------------------------------------------------------------------------------------------------------------------------------------|-------------------------------------------------------------------------------------------------|-------------------------------------------------------------------------------------------------|
| 201 | CHECK COLUMN 9 IN HOUSEHOLD SCHEDULE. RECORD THE LINE NUMBER AND NAME FOR ALL ELIGIBLE CHILDREN 0-5 YEARS IN QUESTION 202. IF MORE THAN SIX CHILDREN, USE ADDITIONAL QUESTIONNAIRE(S). |                                                                                                                                                                                                                                                                                                                                                                                                                                                                                                                                                                                                                                                                                                                                                                                                                                                                                                                                                                                                                |                                                                                                 |                                                                                                 |
|     |                                                                                                                                                                                        | CHILD 4                                                                                                                                                                                                                                                                                                                                                                                                                                                                                                                                                                                                                                                                                                                                                                                                                                                                                                                                                                                                        | CHILD 5                                                                                         | CHILD 6                                                                                         |
| 202 | LINE NUMBER FROM COLUMN 9<br><br>NAME FROM COLUMN 2                                                                                                                                    | LINE NUMBER ..... <input type="text"/><br>NAME _____                                                                                                                                                                                                                                                                                                                                                                                                                                                                                                                                                                                                                                                                                                                                                                                                                                                                                                                                                           | LINE NUMBER ..... <input type="text"/><br>NAME _____                                            | LINE NUMBER ..... <input type="text"/><br>NAME _____                                            |
| 203 | IF MOTHER INTERVIEWED, COPY MONTH AND YEAR OF BIRTH FROM BIRTH HISTORY AND ASK DAY; IF MOTHER NOT INTERVIEWED, ASK:<br>What is (NAME'S) birth date?                                    | DAY ..... <input type="text"/><br>MONTH ..... <input type="text"/><br>YEAR <input type="text"/>                                                                                                                                                                                                                                                                                                                                                                                                                                                                                                                                                                                                                                                                                                                                                                                                                                                                                                                | DAY ..... <input type="text"/><br>MONTH ..... <input type="text"/><br>YEAR <input type="text"/> | DAY ..... <input type="text"/><br>MONTH ..... <input type="text"/><br>YEAR <input type="text"/> |
| 204 | CHECK 203:<br>CHILD BORN IN JANUARY 2009 OR LATER?                                                                                                                                     | YES ..... 1<br>NO ..... 2<br>(GO TO 203 FOR NEXT CHILD OR, IF NO MORE CHILDREN, END INTERVIEW)                                                                                                                                                                                                                                                                                                                                                                                                                                                                                                                                                                                                                                                                                                                                                                                                                                                                                                                 | YES ..... 1<br>NO ..... 2<br>(GO TO 203 FOR NEXT CHILD OR, IF NO MORE CHILDREN, END INTERVIEW)  | YES ..... 1<br>NO ..... 2<br>(GO TO 203 FOR NEXT CHILD OR, IF NO MORE CHILDREN, END INTERVIEW)  |
| 206 | LINE NUMBER OF PARENT/ OTHER ADULT RESPONSIBLE FOR THE CHILD (FROM COLUMN 1 OF HOUSEHOLD SCHEDULE). RECORD '00' IF NOT LISTED.                                                         | LINE NUMBER ..... <input type="text"/>                                                                                                                                                                                                                                                                                                                                                                                                                                                                                                                                                                                                                                                                                                                                                                                                                                                                                                                                                                         | LINE NUMBER ..... <input type="text"/>                                                          | LINE NUMBER ..... <input type="text"/>                                                          |
| 207 | ASK CONSENT FOR ANEMIA TEST FROM PARENT/OTHER ADULT IDENTIFIED IN 206 AS RESPONSIBLE FOR CHILD.                                                                                        | <p>As part of this survey, we are asking children all over the country to take an anemia test. Anemia is a serious health problem that usually results from poor nutrition, infection, or chronic disease. This survey will assist the government to develop programs to prevent and treat anemia. We ask that all children born in 2009 or later take part in anemia testing in this survey and give a few drops of blood from a finger or heel. The equipment used to take the blood is clean and completely safe. It has never been used before and will be thrown away after each test. The blood will be tested for anemia immediately, and the result will be told to you right away. The result will be kept strictly confidential and will not be shared with anyone other than members of our survey team.</p> <p>Do you have any questions?<br/>You can say yes to the test, or you can say no. It is up to you to decide.<br/>Will you allow (NAME OF CHILD) to participate in the anemia test?</p> |                                                                                                 |                                                                                                 |
| 208 | CIRCLE THE APPROPRIATE CODE AND SIGN YOUR NAME.                                                                                                                                        | GRANTED ..... 1<br>_____ (SIGN) ←  <br>REFUSED ..... 2<br>NOT PRESENT ..... 5<br>OTHER ..... 6                                                                                                                                                                                                                                                                                                                                                                                                                                                                                                                                                                                                                                                                                                                                                                                                                                                                                                                 | GRANTED ..... 1<br>_____ (SIGN) ←  <br>REFUSED ..... 2<br>NOT PRESENT ..... 5<br>OTHER ..... 6  | GRANTED ..... 1<br>_____ (SIGN) ←  <br>REFUSED ..... 2<br>NOT PRESENT ..... 5<br>OTHER ..... 6  |

|     |                                                                                                                       | CHILD 4                                                                                                                                                                                                                                                                                                                                                                                                                                                                                                                                                                                                                                                                                                                                                                                                                                                                                                                                                                                                                                                                                                                                                                                                                                                                        | CHILD 5                                                                                                                                                                                                                                                                                                                                             | CHILD 6                                                                                                                                                                                                                                                                                                                                             |
|-----|-----------------------------------------------------------------------------------------------------------------------|--------------------------------------------------------------------------------------------------------------------------------------------------------------------------------------------------------------------------------------------------------------------------------------------------------------------------------------------------------------------------------------------------------------------------------------------------------------------------------------------------------------------------------------------------------------------------------------------------------------------------------------------------------------------------------------------------------------------------------------------------------------------------------------------------------------------------------------------------------------------------------------------------------------------------------------------------------------------------------------------------------------------------------------------------------------------------------------------------------------------------------------------------------------------------------------------------------------------------------------------------------------------------------|-----------------------------------------------------------------------------------------------------------------------------------------------------------------------------------------------------------------------------------------------------------------------------------------------------------------------------------------------------|-----------------------------------------------------------------------------------------------------------------------------------------------------------------------------------------------------------------------------------------------------------------------------------------------------------------------------------------------------|
|     | NAME FROM COLUMN 2                                                                                                    | NAME _____                                                                                                                                                                                                                                                                                                                                                                                                                                                                                                                                                                                                                                                                                                                                                                                                                                                                                                                                                                                                                                                                                                                                                                                                                                                                     | NAME _____                                                                                                                                                                                                                                                                                                                                          | NAME _____                                                                                                                                                                                                                                                                                                                                          |
| 209 | ASK CONSENT FOR MALARIA TEST FROM PARENT/OTHER ADULT IDENTIFIED IN 206 AS RESPONSIBLE FOR CHILD.                      | <p>As part of this survey, we are asking that children all over the country take a test to see if they have malaria. Malaria is a serious illness caused by a parasite transmitted by a mosquito bite. This survey will help the government to develop programs to prevent malaria.</p> <p>We ask that all children born in 2009 or later take part in malaria testing in this survey and give a few drops of blood from a finger or heel. The equipment used to take the blood is clean and completely safe. It has never been used before and will be thrown away after each test. (We will use blood from the same finger or heel prick made for the anemia test). One blood drop will be tested for malaria immediately, and the result will be told to you right away. A few blood drops will be collected on a slide(s) and taken to a laboratory for testing. You will not be told the results of the laboratory testing. All results will be kept strictly confidential and will not be shared with anyone other than members of our survey team.</p> <p>Do you have any questions?<br/>           You can say yes to the test, or you can say no. It is up to you to decide.<br/>           Will you allow (NAME OF CHILD) to participate in the malaria testing?</p> |                                                                                                                                                                                                                                                                                                                                                     |                                                                                                                                                                                                                                                                                                                                                     |
| 210 | CIRCLE THE APPROPRIATE CODE AND SIGN YOUR NAME.                                                                       | GRANTED ..... 1<br>_____ ←  <br>(SIGN)<br>REFUSED ..... 2<br>NOT PRESENT ..... 5<br>OTHER ..... 6                                                                                                                                                                                                                                                                                                                                                                                                                                                                                                                                                                                                                                                                                                                                                                                                                                                                                                                                                                                                                                                                                                                                                                              | GRANTED ..... 1<br>_____ ←  <br>(SIGN)<br>REFUSED ..... 2<br>NOT PRESENT ..... 5<br>OTHER ..... 6                                                                                                                                                                                                                                                   | GRANTED ..... 1<br>_____ ←  <br>(SIGN)<br>REFUSED ..... 2<br>NOT PRESENT ..... 5<br>OTHER ..... 6                                                                                                                                                                                                                                                   |
| 211 | PREPARE EQUIPMENT AND SUPPLIES ONLY FOR THE TEST(S) FOR WHICH CONSENT HAS BEEN OBTAINED AND PROCEED WITH THE TEST(S). |                                                                                                                                                                                                                                                                                                                                                                                                                                                                                                                                                                                                                                                                                                                                                                                                                                                                                                                                                                                                                                                                                                                                                                                                                                                                                |                                                                                                                                                                                                                                                                                                                                                     |                                                                                                                                                                                                                                                                                                                                                     |
| 212 | BAR CODE LABEL FOR MALARIA TEST                                                                                       | <div style="border: 1px dashed black; padding: 5px; text-align: center;">           PUT THE 1ST BAR CODE LABEL HERE.         </div> NOT PRESENT ..... 9994<br>REFUSED ..... 9995<br>OTHER ..... 9996<br><br>PUT THE 2ND BAR CODE ON THE RDT, THE 3RD ON THE THICK SMEAR SLIDE, THE 4TH ON THE THIN SMEAR SLIDE AND THE 5TH ON THE TRANSMITTAL FORM.                                                                                                                                                                                                                                                                                                                                                                                                                                                                                                                                                                                                                                                                                                                                                                                                                                                                                                                            | <div style="border: 1px dashed black; padding: 5px; text-align: center;">           PUT THE 1ST BAR CODE LABEL HERE.         </div> NOT PRESENT ..... 9994<br>REFUSED ..... 9995<br>OTHER ..... 9996<br><br>PUT THE 2ND BAR CODE ON THE RDT, THE 3RD ON THE THICK SMEAR SLIDE, THE 4TH ON THE THIN SMEAR SLIDE AND THE 5TH ON THE TRANSMITTAL FORM. | <div style="border: 1px dashed black; padding: 5px; text-align: center;">           PUT THE 1ST BAR CODE LABEL HERE.         </div> NOT PRESENT ..... 9994<br>REFUSED ..... 9995<br>OTHER ..... 9996<br><br>PUT THE 2ND BAR CODE ON THE RDT, THE 3RD ON THE THICK SMEAR SLIDE, THE 4TH ON THE THIN SMEAR SLIDE AND THE 5TH ON THE TRANSMITTAL FORM. |
| 213 | RECORD HEMOGLOBIN LEVEL HERE AND IN THE ANEMIA AND MALARIA BROCHURE.                                                  | G/DL <input type="text"/> <input type="text"/> <input type="text"/><br>NOT PRESENT ..... 994<br>REFUSED ..... 995<br>OTHER ..... 996                                                                                                                                                                                                                                                                                                                                                                                                                                                                                                                                                                                                                                                                                                                                                                                                                                                                                                                                                                                                                                                                                                                                           | G/DL <input type="text"/> <input type="text"/> <input type="text"/><br>NOT PRESENT ..... 994<br>REFUSED ..... 995<br>OTHER ..... 996                                                                                                                                                                                                                | G/DL <input type="text"/> <input type="text"/> <input type="text"/><br>NOT PRESENT ..... 994<br>REFUSED ..... 995<br>OTHER ..... 996                                                                                                                                                                                                                |
| 214 | RECORD RESULT CODE OF THE MALARIA RDT.                                                                                | TESTED ..... 1<br>NOT PRESENT ..... 2<br>REFUSED ..... 3<br>OTHER ..... 6<br>(SKIP TO 216) ←                                                                                                                                                                                                                                                                                                                                                                                                                                                                                                                                                                                                                                                                                                                                                                                                                                                                                                                                                                                                                                                                                                                                                                                   | TESTED ..... 1<br>NOT PRESENT ..... 2<br>REFUSED ..... 3<br>OTHER ..... 6<br>(SKIP TO 216) ←                                                                                                                                                                                                                                                        | TESTED ..... 1<br>NOT PRESENT ..... 2<br>REFUSED ..... 3<br>OTHER ..... 6<br>(SKIP TO 216) ←                                                                                                                                                                                                                                                        |
| 215 | RECORD THE RESULT OF THE MALARIA RDT HERE AND IN THE ANEMIA AND MALARIA BROCHURE.                                     | POSITIVE ..... 1<br>(SKIP TO 218) ←<br>NEGATIVE ..... 2<br>OTHER ..... 6                                                                                                                                                                                                                                                                                                                                                                                                                                                                                                                                                                                                                                                                                                                                                                                                                                                                                                                                                                                                                                                                                                                                                                                                       | POSITIVE ..... 1<br>(SKIP TO 218) ←<br>NEGATIVE ..... 2<br>OTHER ..... 6                                                                                                                                                                                                                                                                            | POSITIVE ..... 1<br>(SKIP TO 218) ←<br>NEGATIVE ..... 2<br>OTHER ..... 6                                                                                                                                                                                                                                                                            |
| 216 | CHECK 213: HEMOGLOBIN RESULT                                                                                          | BELOW 8.0 G/DL,<br>SEVERE ANEMIA ..... 1<br>8.0 G/DL OR ABOVE ..... 2<br>NOT PRESENT ..... 4<br>REFUSED ..... 5<br>OTHER ..... 6<br>(SKIP TO 229) ←                                                                                                                                                                                                                                                                                                                                                                                                                                                                                                                                                                                                                                                                                                                                                                                                                                                                                                                                                                                                                                                                                                                            | BELOW 8.0 G/DL,<br>SEVERE ANEMIA ..... 1<br>8.0 G/DL OR ABOVE ..... 2<br>NOT PRESENT ..... 4<br>REFUSED ..... 5<br>OTHER ..... 6<br>(SKIP TO 229) ←                                                                                                                                                                                                 | BELOW 8.0 G/DL,<br>SEVERE ANEMIA ..... 1<br>8.0 G/DL OR ABOVE ..... 2<br>NOT PRESENT ..... 4<br>REFUSED ..... 5<br>OTHER ..... 6<br>(SKIP TO 229) ←                                                                                                                                                                                                 |

|     |                                                                                                                                                                                                                                                                                                                                                  | CHILD 4                                                                                                                                                                                                                                                                                                                                                                   | CHILD 5                                                                                                                                                                                                                                                                  | CHILD 6                                                                                                                                                                                                                                                                  |
|-----|--------------------------------------------------------------------------------------------------------------------------------------------------------------------------------------------------------------------------------------------------------------------------------------------------------------------------------------------------|---------------------------------------------------------------------------------------------------------------------------------------------------------------------------------------------------------------------------------------------------------------------------------------------------------------------------------------------------------------------------|--------------------------------------------------------------------------------------------------------------------------------------------------------------------------------------------------------------------------------------------------------------------------|--------------------------------------------------------------------------------------------------------------------------------------------------------------------------------------------------------------------------------------------------------------------------|
|     | NAME FROM COLUMN 2                                                                                                                                                                                                                                                                                                                               | NAME _____                                                                                                                                                                                                                                                                                                                                                                | NAME _____                                                                                                                                                                                                                                                               | NAME _____                                                                                                                                                                                                                                                               |
| 217 | <b><u>SEVERE ANEMIA REFERRAL STATEMENT</u></b>                                                                                                                                                                                                                                                                                                   | The anemia test shows that (NAME OF CHILD) has severe anemia. Your child is very ill and must be taken to a health facility immediately.<br><br>SKIP TO 229                                                                                                                                                                                                               |                                                                                                                                                                                                                                                                          |                                                                                                                                                                                                                                                                          |
| 218 | Does (NAME) suffer from the any of following illnesses or symptoms:<br><br>a) Extreme weakness?<br>b) Heart problems?<br>c) Loss of consciousness?<br>d) Rapid or difficult breathing?<br><br>e) Seizures?<br>f) Abnormal bleeding?<br><br>g) Jaundice or yellow skin?<br><br>h) Dark urine?<br><br>IF NONE OF THE ABOVE SYMPTOMS, CIRCLE CODE Y | EXTREME WEAKNESS . A<br>HEART PROBLEMS . . . B<br>LOSS OF<br>CONSCIOUSNESS . . . C<br>RAPID BREATHING . . . D<br><br>SEIZURES . . . . . E<br>BLEEDING . . . . . F<br><br>JAUNDICE . . . . . G<br><br>DARK URINE . . . . . H<br><br>NONE OF ABOVE<br>SYMPTOMS . . . . . Y                                                                                                  | EXTREME WEAKNESS . A<br>HEART PROBLEMS . . . B<br>LOSS OF<br>CONSCIOUSNESS . . . C<br>RAPID BREATHING . . . D<br><br>SEIZURES . . . . . E<br>BLEEDING . . . . . F<br><br>JAUNDICE . . . . . G<br><br>DARK URINE . . . . . H<br><br>NONE OF ABOVE<br>SYMPTOMS . . . . . Y | EXTREME WEAKNESS . A<br>HEART PROBLEMS . . . B<br>LOSS OF<br>CONSCIOUSNESS . . . C<br>RAPID BREATHING . . . D<br><br>SEIZURES . . . . . E<br>BLEEDING . . . . . F<br><br>JAUNDICE . . . . . G<br><br>DARK URINE . . . . . H<br><br>NONE OF ABOVE<br>SYMPTOMS . . . . . Y |
| 219 | CHECK 218:<br><br>ANY CODE A-H CIRCLED?                                                                                                                                                                                                                                                                                                          | ONLY CODE Y<br>CIRCLED . . . . . 1<br>ANY CODE<br>A-H CIRCLED . . . . 2<br>(SKIP TO 222) ↙                                                                                                                                                                                                                                                                                | ONLY CODE Y<br>CIRCLED . . . . . 1<br>ANY CODE<br>A-H CIRCLED . . . . 2<br>(SKIP TO 222) ↙                                                                                                                                                                               | ONLY CODE Y<br>CIRCLED . . . . . 1<br>ANY CODE<br>A-H CIRCLED . . . . 2<br>(SKIP TO 222) ↙                                                                                                                                                                               |
| 220 | CHECK 213:<br><br>HEMOGLOBIN RESULT                                                                                                                                                                                                                                                                                                              | BELOW 8.0 G/DL,<br>SEVERE ANEMIA . . . 1<br>(SKIP TO 222) ↙<br>8.0 G/DL OR ABOVE . . . 2<br>NOT PRESENT . . . . 4<br>REFUSED . . . . . 5<br>OTHER . . . . . 6                                                                                                                                                                                                             | BELOW 8.0 G/DL,<br>SEVERE ANEMIA . . . 1<br>(SKIP TO 222) ↙<br>8.0 G/DL OR ABOVE . . . 2<br>NOT PRESENT . . . . 4<br>REFUSED . . . . . 5<br>OTHER . . . . . 6                                                                                                            | BELOW 8.0 G/DL,<br>SEVERE ANEMIA . . . 1<br>(SKIP TO 222) ↙<br>8.0 G/DL OR ABOVE . . . 2<br>NOT PRESENT . . . . 4<br>REFUSED . . . . . 5<br>OTHER . . . . . 6                                                                                                            |
| 221 | In the past two weeks has (NAME) taken or is taking COARTEM/ACT given by a doctor or health center to treat the malaria?<br><br>VERIFY BY ASKING TO SEE TREATMENT.                                                                                                                                                                               | YES . . . . . 1<br>(SKIP TO 223) ↙<br><br>NO . . . . . 2<br>(SKIP TO 223A) ↙                                                                                                                                                                                                                                                                                              | YES . . . . . 1<br>(SKIP TO 223) ↙<br><br>NO . . . . . 2<br>(SKIP TO 223A) ↙                                                                                                                                                                                             | YES . . . . . 1<br>(SKIP TO 223) ↙<br><br>NO . . . . . 2<br>(SKIP TO 223A) ↙                                                                                                                                                                                             |
| 222 | <b><u>SEVERE MALARIA REFERRAL STATEMENT</u></b>                                                                                                                                                                                                                                                                                                  | The malaria test shows that (NAME OF CHILD) has malaria. Your child also has symptoms of severe malaria. The malaria treatment I have will not help your child, and I cannot give you the medication. Your child is very ill and must be taken to a health facility right away.<br><br>SKIP TO 228                                                                        |                                                                                                                                                                                                                                                                          |                                                                                                                                                                                                                                                                          |
| 223 | <b><u>ALREADY TAKING [FIRST LINE MEDICATION] REFERRAL STATEMENT</u></b>                                                                                                                                                                                                                                                                          | You have told me that (NAME OF CHILD) has already received COARTEM/ACT for malaria. Therefore, I cannot give you additional COARTEM/ACT. However, the test shows that he/she has malaria. If your child has a fever for two days after the last dose of COARTEM/ACT, you should take the child to the nearest health facility for further examination.<br><br>SKIP TO 228 |                                                                                                                                                                                                                                                                          |                                                                                                                                                                                                                                                                          |

|                                                 |                                                                                                                                  | CHILD 4                                                                                                                                                                                                                                                                                                                                                                                                                                                                                                                                                                                                                                                                                                                                                                                                                                                                                                                                                                                                                                                                                                                                                                                                                                                                                                                                                                                                                                                                                                                                  | CHILD 5                                                                                                                                                                                | CHILD 6                                                                                                                                                                                |                                  |          |                |                          |                                                |                                 |                                                 |                                  |
|-------------------------------------------------|----------------------------------------------------------------------------------------------------------------------------------|------------------------------------------------------------------------------------------------------------------------------------------------------------------------------------------------------------------------------------------------------------------------------------------------------------------------------------------------------------------------------------------------------------------------------------------------------------------------------------------------------------------------------------------------------------------------------------------------------------------------------------------------------------------------------------------------------------------------------------------------------------------------------------------------------------------------------------------------------------------------------------------------------------------------------------------------------------------------------------------------------------------------------------------------------------------------------------------------------------------------------------------------------------------------------------------------------------------------------------------------------------------------------------------------------------------------------------------------------------------------------------------------------------------------------------------------------------------------------------------------------------------------------------------|----------------------------------------------------------------------------------------------------------------------------------------------------------------------------------------|----------------------------------------------------------------------------------------------------------------------------------------------------------------------------------------|----------------------------------|----------|----------------|--------------------------|------------------------------------------------|---------------------------------|-------------------------------------------------|----------------------------------|
|                                                 | NAME FROM COLUMN 2                                                                                                               | NAME _____                                                                                                                                                                                                                                                                                                                                                                                                                                                                                                                                                                                                                                                                                                                                                                                                                                                                                                                                                                                                                                                                                                                                                                                                                                                                                                                                                                                                                                                                                                                               | NAME _____                                                                                                                                                                             | NAME _____                                                                                                                                                                             |                                  |          |                |                          |                                                |                                 |                                                 |                                  |
| 223A                                            | CHECK 203:<br>IS CHILD AGE 0-3 MONTHS, I.E.,<br>WAS CHILD BORN IN MONTH OF<br>INTERVIEW OR THREE PREVIOUS<br>MONTHS?             | 0-3 MONTHS ..... 1<br>OLDER ..... 2<br>SKIP TO 224 ←                                                                                                                                                                                                                                                                                                                                                                                                                                                                                                                                                                                                                                                                                                                                                                                                                                                                                                                                                                                                                                                                                                                                                                                                                                                                                                                                                                                                                                                                                     | 0-3 MONTHS ..... 1<br>OLDER ..... 2<br>SKIP TO 224 ←                                                                                                                                   | 0-3 MONTHS ..... 1<br>OLDER ..... 2<br>SKIP TO 224 ←                                                                                                                                   |                                  |          |                |                          |                                                |                                 |                                                 |                                  |
| 223B                                            | <b><u>UNDER 4 MONTHS MALARIA<br/>REFERRAL STATEMENT</u></b>                                                                      | The malaria test shows that (NAME OF CHILD) has malaria. Your child is also younger than 4 months old and therefore requires special treatment from a health facility. Your child is ill and must be taken to a health facility right away.<br><br>SKIP TO 228                                                                                                                                                                                                                                                                                                                                                                                                                                                                                                                                                                                                                                                                                                                                                                                                                                                                                                                                                                                                                                                                                                                                                                                                                                                                           |                                                                                                                                                                                        |                                                                                                                                                                                        |                                  |          |                |                          |                                                |                                 |                                                 |                                  |
| 224                                             | READ INFORMATION FOR<br>MALARIA TREATMENT AND<br>CONSENT STATEMENT TO<br>PARENT OR OTHER ADULT<br>RESPONSIBLE FOR THE CHILD.     | The malaria test shows that your child has malaria. We can give you free medicine. The medicine is called COARTEM/ACT. COARTEM/ACT is very effective and in a few days it should get rid of the fever and other symptoms. You do not have to give the child the medicine. This is up to you. Please tell me whether you accept the medicine or not.                                                                                                                                                                                                                                                                                                                                                                                                                                                                                                                                                                                                                                                                                                                                                                                                                                                                                                                                                                                                                                                                                                                                                                                      |                                                                                                                                                                                        |                                                                                                                                                                                        |                                  |          |                |                          |                                                |                                 |                                                 |                                  |
| 225                                             | CIRCLE THE APPROPRIATE<br>CODE AND SIGN YOUR NAME.                                                                               | ACCEPTED MEDICINE .. 1<br>_____<br>(SIGN) ←<br>REFUSED ..... 2<br>OTHER ..... 6                                                                                                                                                                                                                                                                                                                                                                                                                                                                                                                                                                                                                                                                                                                                                                                                                                                                                                                                                                                                                                                                                                                                                                                                                                                                                                                                                                                                                                                          | ACCEPTED MEDICINE .. 1<br>_____<br>(SIGN) ←<br>REFUSED ..... 2<br>OTHER ..... 6                                                                                                        | ACCEPTED MEDICINE .. 1<br>_____<br>(SIGN) ←<br>REFUSED ..... 2<br>OTHER ..... 6                                                                                                        |                                  |          |                |                          |                                                |                                 |                                                 |                                  |
| 226                                             | CHECK 225:<br><br>MEDICATION ACCEPTED                                                                                            | ACCEPTED MEDICINE .. 1<br>REFUSED ..... 2<br>OTHER ..... 6<br>(SKIP TO 228) ←                                                                                                                                                                                                                                                                                                                                                                                                                                                                                                                                                                                                                                                                                                                                                                                                                                                                                                                                                                                                                                                                                                                                                                                                                                                                                                                                                                                                                                                            | ACCEPTED MEDICINE .. 1<br>REFUSED ..... 2<br>OTHER ..... 6<br>(SKIP TO 228) ←                                                                                                          | ACCEPTED MEDICINE .. 1<br>REFUSED ..... 2<br>OTHER ..... 6<br>(SKIP TO 228) ←                                                                                                          |                                  |          |                |                          |                                                |                                 |                                                 |                                  |
| 227                                             | TREATMENT FOR CHILDREN<br>WITH POSITIVE MALARIA TESTS                                                                            | <p style="text-align: center;"><b>TREATMENT WITH COARTEM/ACT</b></p> <table border="1" style="width: 100%; border-collapse: collapse;"> <thead> <tr> <th style="text-align: left;">Weight (in Kg) – Approximate age</th> <th style="text-align: left;">Dosage *</th> </tr> </thead> <tbody> <tr> <td>Under 4 months</td> <td>Refer to health facility</td> </tr> <tr> <td>5 kgs. to 14 kgs. (from 4 month up to 3 years)</td> <td>1 tablet twice daily for 3 days</td> </tr> <tr> <td>15 kgs. to 24 kgs. (from 3 years up to 7 years)</td> <td>2 tablets twice daily for 3 days</td> </tr> </tbody> </table> <p>* Co-formulated tablets containing 20 mg Artemether and 120 mg Lumefantrine per tablet</p> <p>First day starts by taking first dose followed by the second one 8 hours later; on subsequent days the recommendation is simply “morning” and “evening” (usually around 12 hours apart). Take the medicine (crushed for smaller children) with high fat food or drinks like milk.</p> <p>Make sure that the FULL 3 days treatment is taken at the recommended times, otherwise the infection may return. If your child vomits within an hour of taking the medicine, you will need to get additional tablets and repeat the dose.</p> <p>ALSO TELL THE PARENT/ADULT RESPONSIBLE FOR THE CHILD: If [NAME] has a high fever, fast or difficult breathing, is not able to drink or breastfeed, gets sicker or does not get better in two days, you should take him/her to a health professional for treatment right away.</p> |                                                                                                                                                                                        |                                                                                                                                                                                        | Weight (in Kg) – Approximate age | Dosage * | Under 4 months | Refer to health facility | 5 kgs. to 14 kgs. (from 4 month up to 3 years) | 1 tablet twice daily for 3 days | 15 kgs. to 24 kgs. (from 3 years up to 7 years) | 2 tablets twice daily for 3 days |
| Weight (in Kg) – Approximate age                | Dosage *                                                                                                                         |                                                                                                                                                                                                                                                                                                                                                                                                                                                                                                                                                                                                                                                                                                                                                                                                                                                                                                                                                                                                                                                                                                                                                                                                                                                                                                                                                                                                                                                                                                                                          |                                                                                                                                                                                        |                                                                                                                                                                                        |                                  |          |                |                          |                                                |                                 |                                                 |                                  |
| Under 4 months                                  | Refer to health facility                                                                                                         |                                                                                                                                                                                                                                                                                                                                                                                                                                                                                                                                                                                                                                                                                                                                                                                                                                                                                                                                                                                                                                                                                                                                                                                                                                                                                                                                                                                                                                                                                                                                          |                                                                                                                                                                                        |                                                                                                                                                                                        |                                  |          |                |                          |                                                |                                 |                                                 |                                  |
| 5 kgs. to 14 kgs. (from 4 month up to 3 years)  | 1 tablet twice daily for 3 days                                                                                                  |                                                                                                                                                                                                                                                                                                                                                                                                                                                                                                                                                                                                                                                                                                                                                                                                                                                                                                                                                                                                                                                                                                                                                                                                                                                                                                                                                                                                                                                                                                                                          |                                                                                                                                                                                        |                                                                                                                                                                                        |                                  |          |                |                          |                                                |                                 |                                                 |                                  |
| 15 kgs. to 24 kgs. (from 3 years up to 7 years) | 2 tablets twice daily for 3 days                                                                                                 |                                                                                                                                                                                                                                                                                                                                                                                                                                                                                                                                                                                                                                                                                                                                                                                                                                                                                                                                                                                                                                                                                                                                                                                                                                                                                                                                                                                                                                                                                                                                          |                                                                                                                                                                                        |                                                                                                                                                                                        |                                  |          |                |                          |                                                |                                 |                                                 |                                  |
| 228                                             | RECORD THE RESULT CODE OF<br><b><u>MALARIA TREATMENT OR<br/>REFERRAL.</u></b>                                                    | MEDICATION GIVEN ... 1<br>MEDS REFUSED ..... 2<br>SEVERE MALARIA<br>REFERRAL ..... 3<br>ALREADY TAKING ACTS<br>REFERRAL ..... 4<br>UNDER 4 MONTHS<br>REFERRAL ..... 5<br>OTHER ..... 6                                                                                                                                                                                                                                                                                                                                                                                                                                                                                                                                                                                                                                                                                                                                                                                                                                                                                                                                                                                                                                                                                                                                                                                                                                                                                                                                                   | MEDICATION GIVEN ... 1<br>MEDS REFUSED ..... 2<br>SEVERE MALARIA<br>REFERRAL ..... 3<br>ALREADY TAKING ACTS<br>REFERRAL ..... 4<br>UNDER 4 MONTHS<br>REFERRAL ..... 5<br>OTHER ..... 6 | MEDICATION GIVEN ... 1<br>MEDS REFUSED ..... 2<br>SEVERE MALARIA<br>REFERRAL ..... 3<br>ALREADY TAKING ACTS<br>REFERRAL ..... 4<br>UNDER 4 MONTHS<br>REFERRAL ..... 5<br>OTHER ..... 6 |                                  |          |                |                          |                                                |                                 |                                                 |                                  |
| 229                                             | GO BACK TO 202 IN NEXT COLUMN OF THIS QUESTIONNAIRE OR IN THE FIRST COLUMN OF THE NEXT PAGE; IF NO MORE CHILDREN, END INTERVIEW. |                                                                                                                                                                                                                                                                                                                                                                                                                                                                                                                                                                                                                                                                                                                                                                                                                                                                                                                                                                                                                                                                                                                                                                                                                                                                                                                                                                                                                                                                                                                                          |                                                                                                                                                                                        |                                                                                                                                                                                        |                                  |          |                |                          |                                                |                                 |                                                 |                                  |
