# Supplementary material for: Long lasting insecticidal bed nets ownership, access and use in a high malaria transmission setting before and after a mass distribution campaign in Uganda
Source: PubMed Central journal article supplement (PMC5773208; doi:10.1371/journal.pone.0191191), 2018-01-18
Supplement: pone.0191191.s002.pdf [file pone.0191191.s002.pdf]

2014 UGANDA MALARIA INDICATOR SURVEY  
WOMAN'S QUESTIONNAIRE

UGANDA  
IDRC/MOH/UBOS

FORMATTING DATE: 19 November 2014  
LANGUAGE DATE: 19 November 2014

| IDENTIFICATION (1)                   |                                                                                                                                                                                                                                                                                                                                                                                                                                                                                                                                                                                                                                                                                                                                                                                                                                                                                                                                                                                                                                                                                                                                                                                                                                                                                                                                                                                                                                                                                                                                                                       |  |  |  |  |  |  |  |  |  |  |  |  |  |  |  |  |  |  |  |  |  |  |  |  |  |  |  |  |  |  |
|--------------------------------------|-----------------------------------------------------------------------------------------------------------------------------------------------------------------------------------------------------------------------------------------------------------------------------------------------------------------------------------------------------------------------------------------------------------------------------------------------------------------------------------------------------------------------------------------------------------------------------------------------------------------------------------------------------------------------------------------------------------------------------------------------------------------------------------------------------------------------------------------------------------------------------------------------------------------------------------------------------------------------------------------------------------------------------------------------------------------------------------------------------------------------------------------------------------------------------------------------------------------------------------------------------------------------------------------------------------------------------------------------------------------------------------------------------------------------------------------------------------------------------------------------------------------------------------------------------------------------|--|--|--|--|--|--|--|--|--|--|--|--|--|--|--|--|--|--|--|--|--|--|--|--|--|--|--|--|--|--|
| REGION _____                         | <table border="1" style="width: 100%; height: 100%; border-collapse: collapse;"> <tr><td style="width: 10px; height: 15px;"></td><td style="width: 10px; height: 15px;"></td><td style="width: 10px; height: 15px;"></td></tr> <tr><td style="width: 10px; height: 15px;"></td><td style="width: 10px; height: 15px;"></td><td style="width: 10px; height: 15px;"></td></tr> <tr><td style="width: 10px; height: 15px;"></td><td style="width: 10px; height: 15px;"></td><td style="width: 10px; height: 15px;"></td></tr> <tr><td style="width: 10px; height: 15px;"></td><td style="width: 10px; height: 15px;"></td><td style="width: 10px; height: 15px;"></td></tr> <tr><td style="width: 10px; height: 15px;"></td><td style="width: 10px; height: 15px;"></td><td style="width: 10px; height: 15px;"></td></tr> <tr><td style="width: 10px; height: 15px;"></td><td style="width: 10px; height: 15px;"></td><td style="width: 10px; height: 15px;"></td></tr> <tr><td style="width: 10px; height: 15px;"></td><td style="width: 10px; height: 15px;"></td><td style="width: 10px; height: 15px;"></td></tr> <tr><td style="width: 10px; height: 15px;"></td><td style="width: 10px; height: 15px;"></td><td style="width: 10px; height: 15px;"></td></tr> <tr><td style="width: 10px; height: 15px;"></td><td style="width: 10px; height: 15px;"></td><td style="width: 10px; height: 15px;"></td></tr> <tr><td style="width: 10px; height: 15px;"></td><td style="width: 10px; height: 15px;"></td><td style="width: 10px; height: 15px;"></td></tr> </table> |  |  |  |  |  |  |  |  |  |  |  |  |  |  |  |  |  |  |  |  |  |  |  |  |  |  |  |  |  |  |
|                                      |                                                                                                                                                                                                                                                                                                                                                                                                                                                                                                                                                                                                                                                                                                                                                                                                                                                                                                                                                                                                                                                                                                                                                                                                                                                                                                                                                                                                                                                                                                                                                                       |  |  |  |  |  |  |  |  |  |  |  |  |  |  |  |  |  |  |  |  |  |  |  |  |  |  |  |  |  |  |
|                                      |                                                                                                                                                                                                                                                                                                                                                                                                                                                                                                                                                                                                                                                                                                                                                                                                                                                                                                                                                                                                                                                                                                                                                                                                                                                                                                                                                                                                                                                                                                                                                                       |  |  |  |  |  |  |  |  |  |  |  |  |  |  |  |  |  |  |  |  |  |  |  |  |  |  |  |  |  |  |
|                                      |                                                                                                                                                                                                                                                                                                                                                                                                                                                                                                                                                                                                                                                                                                                                                                                                                                                                                                                                                                                                                                                                                                                                                                                                                                                                                                                                                                                                                                                                                                                                                                       |  |  |  |  |  |  |  |  |  |  |  |  |  |  |  |  |  |  |  |  |  |  |  |  |  |  |  |  |  |  |
|                                      |                                                                                                                                                                                                                                                                                                                                                                                                                                                                                                                                                                                                                                                                                                                                                                                                                                                                                                                                                                                                                                                                                                                                                                                                                                                                                                                                                                                                                                                                                                                                                                       |  |  |  |  |  |  |  |  |  |  |  |  |  |  |  |  |  |  |  |  |  |  |  |  |  |  |  |  |  |  |
|                                      |                                                                                                                                                                                                                                                                                                                                                                                                                                                                                                                                                                                                                                                                                                                                                                                                                                                                                                                                                                                                                                                                                                                                                                                                                                                                                                                                                                                                                                                                                                                                                                       |  |  |  |  |  |  |  |  |  |  |  |  |  |  |  |  |  |  |  |  |  |  |  |  |  |  |  |  |  |  |
|                                      |                                                                                                                                                                                                                                                                                                                                                                                                                                                                                                                                                                                                                                                                                                                                                                                                                                                                                                                                                                                                                                                                                                                                                                                                                                                                                                                                                                                                                                                                                                                                                                       |  |  |  |  |  |  |  |  |  |  |  |  |  |  |  |  |  |  |  |  |  |  |  |  |  |  |  |  |  |  |
|                                      |                                                                                                                                                                                                                                                                                                                                                                                                                                                                                                                                                                                                                                                                                                                                                                                                                                                                                                                                                                                                                                                                                                                                                                                                                                                                                                                                                                                                                                                                                                                                                                       |  |  |  |  |  |  |  |  |  |  |  |  |  |  |  |  |  |  |  |  |  |  |  |  |  |  |  |  |  |  |
|                                      |                                                                                                                                                                                                                                                                                                                                                                                                                                                                                                                                                                                                                                                                                                                                                                                                                                                                                                                                                                                                                                                                                                                                                                                                                                                                                                                                                                                                                                                                                                                                                                       |  |  |  |  |  |  |  |  |  |  |  |  |  |  |  |  |  |  |  |  |  |  |  |  |  |  |  |  |  |  |
|                                      |                                                                                                                                                                                                                                                                                                                                                                                                                                                                                                                                                                                                                                                                                                                                                                                                                                                                                                                                                                                                                                                                                                                                                                                                                                                                                                                                                                                                                                                                                                                                                                       |  |  |  |  |  |  |  |  |  |  |  |  |  |  |  |  |  |  |  |  |  |  |  |  |  |  |  |  |  |  |
|                                      |                                                                                                                                                                                                                                                                                                                                                                                                                                                                                                                                                                                                                                                                                                                                                                                                                                                                                                                                                                                                                                                                                                                                                                                                                                                                                                                                                                                                                                                                                                                                                                       |  |  |  |  |  |  |  |  |  |  |  |  |  |  |  |  |  |  |  |  |  |  |  |  |  |  |  |  |  |  |
| DISTRICT _____                       |                                                                                                                                                                                                                                                                                                                                                                                                                                                                                                                                                                                                                                                                                                                                                                                                                                                                                                                                                                                                                                                                                                                                                                                                                                                                                                                                                                                                                                                                                                                                                                       |  |  |  |  |  |  |  |  |  |  |  |  |  |  |  |  |  |  |  |  |  |  |  |  |  |  |  |  |  |  |
| COUNTY _____                         |                                                                                                                                                                                                                                                                                                                                                                                                                                                                                                                                                                                                                                                                                                                                                                                                                                                                                                                                                                                                                                                                                                                                                                                                                                                                                                                                                                                                                                                                                                                                                                       |  |  |  |  |  |  |  |  |  |  |  |  |  |  |  |  |  |  |  |  |  |  |  |  |  |  |  |  |  |  |
| SUBCOUNTY/TOWN _____                 |                                                                                                                                                                                                                                                                                                                                                                                                                                                                                                                                                                                                                                                                                                                                                                                                                                                                                                                                                                                                                                                                                                                                                                                                                                                                                                                                                                                                                                                                                                                                                                       |  |  |  |  |  |  |  |  |  |  |  |  |  |  |  |  |  |  |  |  |  |  |  |  |  |  |  |  |  |  |
| PARISH/LC2 NAME _____                |                                                                                                                                                                                                                                                                                                                                                                                                                                                                                                                                                                                                                                                                                                                                                                                                                                                                                                                                                                                                                                                                                                                                                                                                                                                                                                                                                                                                                                                                                                                                                                       |  |  |  |  |  |  |  |  |  |  |  |  |  |  |  |  |  |  |  |  |  |  |  |  |  |  |  |  |  |  |
| EA NAME _____                        |                                                                                                                                                                                                                                                                                                                                                                                                                                                                                                                                                                                                                                                                                                                                                                                                                                                                                                                                                                                                                                                                                                                                                                                                                                                                                                                                                                                                                                                                                                                                                                       |  |  |  |  |  |  |  |  |  |  |  |  |  |  |  |  |  |  |  |  |  |  |  |  |  |  |  |  |  |  |
| UMIS NUMBER .....                    |                                                                                                                                                                                                                                                                                                                                                                                                                                                                                                                                                                                                                                                                                                                                                                                                                                                                                                                                                                                                                                                                                                                                                                                                                                                                                                                                                                                                                                                                                                                                                                       |  |  |  |  |  |  |  |  |  |  |  |  |  |  |  |  |  |  |  |  |  |  |  |  |  |  |  |  |  |  |
| URBAN=1, PERI URBAN=2, RURAL=3 ..... |                                                                                                                                                                                                                                                                                                                                                                                                                                                                                                                                                                                                                                                                                                                                                                                                                                                                                                                                                                                                                                                                                                                                                                                                                                                                                                                                                                                                                                                                                                                                                                       |  |  |  |  |  |  |  |  |  |  |  |  |  |  |  |  |  |  |  |  |  |  |  |  |  |  |  |  |  |  |
| NAME AND LINE NUMBER OF WOMAN _____  |                                                                                                                                                                                                                                                                                                                                                                                                                                                                                                                                                                                                                                                                                                                                                                                                                                                                                                                                                                                                                                                                                                                                                                                                                                                                                                                                                                                                                                                                                                                                                                       |  |  |  |  |  |  |  |  |  |  |  |  |  |  |  |  |  |  |  |  |  |  |  |  |  |  |  |  |  |  |
| HOUSEHOLD NUMBER .....               |                                                                                                                                                                                                                                                                                                                                                                                                                                                                                                                                                                                                                                                                                                                                                                                                                                                                                                                                                                                                                                                                                                                                                                                                                                                                                                                                                                                                                                                                                                                                                                       |  |  |  |  |  |  |  |  |  |  |  |  |  |  |  |  |  |  |  |  |  |  |  |  |  |  |  |  |  |  |
| HOUSEHOLD SAMPLE NUMBER .....        |                                                                                                                                                                                                                                                                                                                                                                                                                                                                                                                                                                                                                                                                                                                                                                                                                                                                                                                                                                                                                                                                                                                                                                                                                                                                                                                                                                                                                                                                                                                                                                       |  |  |  |  |  |  |  |  |  |  |  |  |  |  |  |  |  |  |  |  |  |  |  |  |  |  |  |  |  |  |

| INTERVIEWER VISITS |       |       |       |                                                                                                                                                                                                                                                                                     |
|--------------------|-------|-------|-------|-------------------------------------------------------------------------------------------------------------------------------------------------------------------------------------------------------------------------------------------------------------------------------------|
|                    | 1     | 2     | 3     | FINAL VISIT                                                                                                                                                                                                                                                                         |
| DATE               | _____ | _____ | _____ | DAY <table border="1" style="width: 20px; height: 15px; display: inline-table;"></table><br>MONTH <table border="1" style="width: 20px; height: 15px; display: inline-table;"></table><br>YEAR <table border="1" style="width: 20px; height: 15px; display: inline-table;"></table> |
| INTERVIEWER'S NAME | _____ | _____ | _____ | INT. NUMBER <table border="1" style="width: 20px; height: 15px; display: inline-table;"></table>                                                                                                                                                                                    |
| RESULT*            | _____ | _____ | _____ | RESULT <table border="1" style="width: 20px; height: 15px; display: inline-table;"></table>                                                                                                                                                                                         |
| NEXT VISIT: DATE   | _____ | _____ |       | TOTAL NUMBER OF VISITS <table border="1" style="width: 20px; height: 15px; display: inline-table;"></table>                                                                                                                                                                         |
| TIME               | _____ | _____ |       |                                                                                                                                                                                                                                                                                     |

\*RESULT CODES:

- |               |                    |               |
|---------------|--------------------|---------------|
| 1 COMPLETED   | 4 REFUSED          |               |
| 2 NOT AT HOME | 5 PARTLY COMPLETED | 7 OTHER _____ |
| 3 POSTPONED   | 6 INCAPACITATED    | (SPECIFY)     |

|                                                                   |                                                                                                                                                                                                                                                                                                                                           |   |  |  |  |  |                |
|-------------------------------------------------------------------|-------------------------------------------------------------------------------------------------------------------------------------------------------------------------------------------------------------------------------------------------------------------------------------------------------------------------------------------|---|--|--|--|--|----------------|
| LANGUAGE OF THE QUESTIONNAIRE .....                               | <table border="1" style="width: 20px; height: 100%; border-collapse: collapse;"> <tr><td style="text-align: center;">7</td></tr> <tr><td style="text-align: center;"> </td></tr> <tr><td style="text-align: center;"> </td></tr> <tr><td style="text-align: center;"> </td></tr> <tr><td style="text-align: center;"> </td></tr> </table> | 7 |  |  |  |  | LANGUAGE USED: |
| 7                                                                 |                                                                                                                                                                                                                                                                                                                                           |   |  |  |  |  |                |
|                                                                   |                                                                                                                                                                                                                                                                                                                                           |   |  |  |  |  |                |
|                                                                   |                                                                                                                                                                                                                                                                                                                                           |   |  |  |  |  |                |
|                                                                   |                                                                                                                                                                                                                                                                                                                                           |   |  |  |  |  |                |
|                                                                   |                                                                                                                                                                                                                                                                                                                                           |   |  |  |  |  |                |
| LANGUAGE USED IN THE INTERVIEW .....                              | 1 ATESO-KARAMOJONG                                                                                                                                                                                                                                                                                                                        |   |  |  |  |  |                |
| NATIVE LANGUAGE OF RESPONDENT .....                               | 2 LUGANDA                                                                                                                                                                                                                                                                                                                                 |   |  |  |  |  |                |
| TRANSLATOR USED (NOT AT ALL=1; SOMETIMES=2; ALL THE TIME=3) ..... | 3 LUGBARA                                                                                                                                                                                                                                                                                                                                 |   |  |  |  |  |                |
| LANGUAGE OF THE QUESTIONNAIRE <b>English</b>                      | 4 LUO                                                                                                                                                                                                                                                                                                                                     |   |  |  |  |  |                |
|                                                                   | 5 RUNYANKORE-RUKIGA                                                                                                                                                                                                                                                                                                                       |   |  |  |  |  |                |
|                                                                   | 6 RUNYORO-RUTORO                                                                                                                                                                                                                                                                                                                          |   |  |  |  |  |                |
|                                                                   | 7 ENGLISH                                                                                                                                                                                                                                                                                                                                 |   |  |  |  |  |                |
|                                                                   | 8 OTHER _____                                                                                                                                                                                                                                                                                                                             |   |  |  |  |  |                |
|                                                                   | (SPECIFY)                                                                                                                                                                                                                                                                                                                                 |   |  |  |  |  |                |

|                                                                                                 |                                                                                            |                                                                                            |
|-------------------------------------------------------------------------------------------------|--------------------------------------------------------------------------------------------|--------------------------------------------------------------------------------------------|
| SUPERVISOR                                                                                      | OFFICE EDITOR                                                                              | KEYED BY                                                                                   |
| NAME _____ <table border="1" style="width: 30px; height: 20px; display: inline-table;"></table> | _____ <table border="1" style="width: 30px; height: 20px; display: inline-table;"></table> | _____ <table border="1" style="width: 30px; height: 20px; display: inline-table;"></table> |

SECTION 1. RESPONDENT'S BACKGROUND

INTRODUCTION AND CONSENT

**INFORMED CONSENT**

Hello. My name is \_\_\_\_\_. I am working with MOH. We are conducting a survey about malaria all over UGANDA. The information we collect will help the government to plan health services. Your household was selected for the survey. The questions usually take about 10-20 minutes. All of the answers you give will be confidential and will not be shared with anyone other than members of our survey team. You don't have to be in the survey, but we hope you will agree to answer the questions since your views are important. If I ask you any question you don't want to answer, just let me know and I will go on to the next question or you can stop the interview at any time.

In case you need more information about the survey, you may contact the person listed on the card that has already been given to your household.

Do you have any questions? May I begin the interview now?

SIGNATURE OF INTERVIEWER: \_\_\_\_\_ DATE: \_\_\_\_\_

RESPONDENT AGREES TO BE INTERVIEWED ... 1      RESPONDENT DOES NOT AGREE TO BE INTERVIEWED ... 2 → END

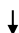

| NO. | QUESTIONS AND FILTERS                                                                                                        | CODING CATEGORIES                                                                                                                                                                                                  | SKIP  |
|-----|------------------------------------------------------------------------------------------------------------------------------|--------------------------------------------------------------------------------------------------------------------------------------------------------------------------------------------------------------------|-------|
| 101 | RECORD THE TIME.                                                                                                             | HOUR ..... <input type="text"/> <input type="text"/><br>MINUTES ..... <input type="text"/> <input type="text"/>                                                                                                    |       |
| 102 | In what month and year were you born?                                                                                        | MONTH ..... <input type="text"/> <input type="text"/><br>DON'T KNOW MONTH ..... 98<br>YEAR ..... <input type="text"/> <input type="text"/> <input type="text"/> <input type="text"/><br>DON'T KNOW YEAR ..... 9998 |       |
| 103 | How old were you at your last birthday?<br>COMPARE AND CORRECT 102 AND/OR 103 IF INCONSISTENT.                               | AGE IN COMPLETED YEARS <input type="text"/> <input type="text"/>                                                                                                                                                   |       |
| 104 | Have you ever attended school?                                                                                               | YES ..... 1<br>NO ..... 2                                                                                                                                                                                          | → 108 |
| 105 | What is the highest level of school you attended: primary, 'O' level 'A' level or university or tertiary ?                   | PRIMARY ..... 1<br>'O' LEVEL ..... 2<br>'A' LEVEL ..... 3<br>UNIVERSITY/TERTIARY ..... 4                                                                                                                           |       |
| 106 | What is the highest (class/year) you completed at that level?<br>IF COMPLETED LESS THAN ONE YEAR AT THAT LEVEL, RECORD '00'. | CLASS/YEAR ..... <input type="text"/> <input type="text"/>                                                                                                                                                         |       |
| 107 | CHECK 105:<br>PRIMARY <input type="checkbox"/> SECONDARY OR HIGHER <input type="checkbox"/>                                  |                                                                                                                                                                                                                    | → 109 |

| NO.                              | QUESTIONS AND FILTERS                                                                                                                                                                                                                     | CODING CATEGORIES                                                                                                                                                                                                                                                                                                                                                                                                                                                                                                                                                                                                                                                                                                                                                                                                                                                                                                                                                                | SKIP  |            |           |                |   |   |                     |   |   |                           |   |   |                                  |   |   |                          |   |   |                        |   |   |  |
|----------------------------------|-------------------------------------------------------------------------------------------------------------------------------------------------------------------------------------------------------------------------------------------|----------------------------------------------------------------------------------------------------------------------------------------------------------------------------------------------------------------------------------------------------------------------------------------------------------------------------------------------------------------------------------------------------------------------------------------------------------------------------------------------------------------------------------------------------------------------------------------------------------------------------------------------------------------------------------------------------------------------------------------------------------------------------------------------------------------------------------------------------------------------------------------------------------------------------------------------------------------------------------|-------|------------|-----------|----------------|---|---|---------------------|---|---|---------------------------|---|---|----------------------------------|---|---|--------------------------|---|---|------------------------|---|---|--|
| 108                              | <p>Now I would like you to read this sentence to me.</p> <p>SHOW CARD TO RESPONDENT.</p> <p>IF RESPONDENT CANNOT READ WHOLE SENTENCE, PROBE:</p> <p>Can you read any part of the sentence to me?</p>                                      | <p>CANNOT READ AT ALL ..... 1</p> <p>ABLE TO READ ONLY PARTS OF SENTENCE ..... 2</p> <p>ABLE TO READ WHOLE SENTENCE ... 3</p> <p>NO CARD WITH REQUIRED LANGUAGE _____ 4<br/>(SPECIFY LANGUAGE)</p> <p>BLIND/VISUALLY IMPAIRED ..... 5</p>                                                                                                                                                                                                                                                                                                                                                                                                                                                                                                                                                                                                                                                                                                                                        |       |            |           |                |   |   |                     |   |   |                           |   |   |                                  |   |   |                          |   |   |                        |   |   |  |
| 109                              | <p>What is your religion?</p>                                                                                                                                                                                                             | <p>CATHOLIC ..... 01</p> <p>ANGLICAN/PROTESTANT ..... 02</p> <p>SDA ..... 03</p> <p>ORTHODOX ..... 04</p> <p>PENTECOSTAL ..... 05</p> <p>OTHER CHRISTIAN ..... 06</p> <p>MOSLEM ..... 07</p> <p>BAHAI ..... 08</p> <p>TRADITIONAL ..... 09</p> <p>HINDU ..... 10</p> <p>NONE ..... 11</p> <p>OTHER _____ 96<br/>(SPECIFY)</p>                                                                                                                                                                                                                                                                                                                                                                                                                                                                                                                                                                                                                                                    |       |            |           |                |   |   |                     |   |   |                           |   |   |                                  |   |   |                          |   |   |                        |   |   |  |
| 110                              | <p>What is your ethnic group?</p>                                                                                                                                                                                                         | <p>BAGANDA ..... 01</p> <p>BANYANKORE ..... 02</p> <p>ITESO ..... 03</p> <p>LUGBARA/MADI ..... 04</p> <p>BASOGA ..... 05</p> <p>LANGI ..... 06</p> <p>BAKIGA ..... 07</p> <p>KARIMOJONG ..... 08</p> <p>ACHOLI ..... 09</p> <p>BAGISU/SABINY ..... 10</p> <p>ALUR/JOPADHOLA ..... 11</p> <p>BANYORO ..... 12</p> <p>BATORO ..... 13</p> <p>OTHER _____ 96<br/>(SPECIFY)</p>                                                                                                                                                                                                                                                                                                                                                                                                                                                                                                                                                                                                      |       |            |           |                |   |   |                     |   |   |                           |   |   |                                  |   |   |                          |   |   |                        |   |   |  |
| 111                              | <p>In the past six months, have you seen or heard any messages about malaria?</p>                                                                                                                                                         | <p>YES ..... 1</p> <p>NO ..... 2</p>                                                                                                                                                                                                                                                                                                                                                                                                                                                                                                                                                                                                                                                                                                                                                                                                                                                                                                                                             | → 201 |            |           |                |   |   |                     |   |   |                           |   |   |                                  |   |   |                          |   |   |                        |   |   |  |
| 112                              | <p>Have you seen or heard these messages:</p> <p>a) On the radio?</p> <p>b) On the television?</p> <p>c) On a poster or billboard?</p> <p>d) From a community health worker?</p> <p>e) At a community event?</p> <p>f) Anywhere else?</p> | <table style="width: 100%; border-collapse: collapse;"> <thead> <tr> <th></th> <th style="text-align: center;"><u>YES</u></th> <th style="text-align: center;"><u>NO</u></th> </tr> </thead> <tbody> <tr> <td>a) RADIO .....</td> <td style="text-align: center;">1</td> <td style="text-align: center;">2</td> </tr> <tr> <td>b) TELEVISION .....</td> <td style="text-align: center;">1</td> <td style="text-align: center;">2</td> </tr> <tr> <td>c) POSTER OR BILLBOARD ..</td> <td style="text-align: center;">1</td> <td style="text-align: center;">2</td> </tr> <tr> <td>d) COMMUNITY HEALTH WORKER .....</td> <td style="text-align: center;">1</td> <td style="text-align: center;">2</td> </tr> <tr> <td>e) COMMUNITY EVENT .....</td> <td style="text-align: center;">1</td> <td style="text-align: center;">2</td> </tr> <tr> <td>f) ANYWHERE ELSE .....</td> <td style="text-align: center;">1</td> <td style="text-align: center;">2</td> </tr> </tbody> </table> |       | <u>YES</u> | <u>NO</u> | a) RADIO ..... | 1 | 2 | b) TELEVISION ..... | 1 | 2 | c) POSTER OR BILLBOARD .. | 1 | 2 | d) COMMUNITY HEALTH WORKER ..... | 1 | 2 | e) COMMUNITY EVENT ..... | 1 | 2 | f) ANYWHERE ELSE ..... | 1 | 2 |  |
|                                  | <u>YES</u>                                                                                                                                                                                                                                | <u>NO</u>                                                                                                                                                                                                                                                                                                                                                                                                                                                                                                                                                                                                                                                                                                                                                                                                                                                                                                                                                                        |       |            |           |                |   |   |                     |   |   |                           |   |   |                                  |   |   |                          |   |   |                        |   |   |  |
| a) RADIO .....                   | 1                                                                                                                                                                                                                                         | 2                                                                                                                                                                                                                                                                                                                                                                                                                                                                                                                                                                                                                                                                                                                                                                                                                                                                                                                                                                                |       |            |           |                |   |   |                     |   |   |                           |   |   |                                  |   |   |                          |   |   |                        |   |   |  |
| b) TELEVISION .....              | 1                                                                                                                                                                                                                                         | 2                                                                                                                                                                                                                                                                                                                                                                                                                                                                                                                                                                                                                                                                                                                                                                                                                                                                                                                                                                                |       |            |           |                |   |   |                     |   |   |                           |   |   |                                  |   |   |                          |   |   |                        |   |   |  |
| c) POSTER OR BILLBOARD ..        | 1                                                                                                                                                                                                                                         | 2                                                                                                                                                                                                                                                                                                                                                                                                                                                                                                                                                                                                                                                                                                                                                                                                                                                                                                                                                                                |       |            |           |                |   |   |                     |   |   |                           |   |   |                                  |   |   |                          |   |   |                        |   |   |  |
| d) COMMUNITY HEALTH WORKER ..... | 1                                                                                                                                                                                                                                         | 2                                                                                                                                                                                                                                                                                                                                                                                                                                                                                                                                                                                                                                                                                                                                                                                                                                                                                                                                                                                |       |            |           |                |   |   |                     |   |   |                           |   |   |                                  |   |   |                          |   |   |                        |   |   |  |
| e) COMMUNITY EVENT .....         | 1                                                                                                                                                                                                                                         | 2                                                                                                                                                                                                                                                                                                                                                                                                                                                                                                                                                                                                                                                                                                                                                                                                                                                                                                                                                                                |       |            |           |                |   |   |                     |   |   |                           |   |   |                                  |   |   |                          |   |   |                        |   |   |  |
| f) ANYWHERE ELSE .....           | 1                                                                                                                                                                                                                                         | 2                                                                                                                                                                                                                                                                                                                                                                                                                                                                                                                                                                                                                                                                                                                                                                                                                                                                                                                                                                                |       |            |           |                |   |   |                     |   |   |                           |   |   |                                  |   |   |                          |   |   |                        |   |   |  |

SECTION 2. REPRODUCTION

| NO. | QUESTIONS AND FILTERS                                                                                                                                                                                                                   | CODING CATEGORIES                                                                                                                                                                                                                                                                                                                             | SKIP  |  |       |  |  |  |  |  |  |
|-----|-----------------------------------------------------------------------------------------------------------------------------------------------------------------------------------------------------------------------------------------|-----------------------------------------------------------------------------------------------------------------------------------------------------------------------------------------------------------------------------------------------------------------------------------------------------------------------------------------------|-------|--|-------|--|--|--|--|--|--|
| 201 | Now I would like to ask about all the births you have had during your life. Have you ever given birth?                                                                                                                                  | YES ..... 1<br>NO ..... 2                                                                                                                                                                                                                                                                                                                     | → 206 |  |       |  |  |  |  |  |  |
| 202 | Do you have any sons or daughters to whom you have given birth who are now living with you?                                                                                                                                             | YES ..... 1<br>NO ..... 2                                                                                                                                                                                                                                                                                                                     | → 204 |  |       |  |  |  |  |  |  |
| 203 | a) How many sons live with you?<br>b) And how many daughters live with you?<br><br>IF NONE, RECORD '00'.                                                                                                                                | a) SONS AT HOME ..... <table border="1" style="display: inline-table; vertical-align: middle;"><tr><td> </td><td> </td></tr><tr><td> </td><td> </td></tr></table><br>b) DAUGHTERS AT HOME ..... <table border="1" style="display: inline-table; vertical-align: middle;"><tr><td> </td><td> </td></tr><tr><td> </td><td> </td></tr></table>   |       |  |       |  |  |  |  |  |  |
|     |                                                                                                                                                                                                                                         |                                                                                                                                                                                                                                                                                                                                               |       |  |       |  |  |  |  |  |  |
|     |                                                                                                                                                                                                                                         |                                                                                                                                                                                                                                                                                                                                               |       |  |       |  |  |  |  |  |  |
|     |                                                                                                                                                                                                                                         |                                                                                                                                                                                                                                                                                                                                               |       |  |       |  |  |  |  |  |  |
|     |                                                                                                                                                                                                                                         |                                                                                                                                                                                                                                                                                                                                               |       |  |       |  |  |  |  |  |  |
| 204 | Do you have any sons or daughters to whom you have given birth who are alive but do not live with you?                                                                                                                                  | YES ..... 1<br>NO ..... 2                                                                                                                                                                                                                                                                                                                     | → 206 |  |       |  |  |  |  |  |  |
| 205 | a) How many sons are alive but do not live with you?<br>b) And how many daughters are alive but do not live with you?<br><br>IF NONE, RECORD '00'.                                                                                      | a) SONS ELSEWHERE ..... <table border="1" style="display: inline-table; vertical-align: middle;"><tr><td> </td><td> </td></tr><tr><td> </td><td> </td></tr></table><br>b) DAUGHTERS ELSEWHERE ... <table border="1" style="display: inline-table; vertical-align: middle;"><tr><td> </td><td> </td></tr><tr><td> </td><td> </td></tr></table> |       |  |       |  |  |  |  |  |  |
|     |                                                                                                                                                                                                                                         |                                                                                                                                                                                                                                                                                                                                               |       |  |       |  |  |  |  |  |  |
|     |                                                                                                                                                                                                                                         |                                                                                                                                                                                                                                                                                                                                               |       |  |       |  |  |  |  |  |  |
|     |                                                                                                                                                                                                                                         |                                                                                                                                                                                                                                                                                                                                               |       |  |       |  |  |  |  |  |  |
|     |                                                                                                                                                                                                                                         |                                                                                                                                                                                                                                                                                                                                               |       |  |       |  |  |  |  |  |  |
| 206 | Have you ever given birth to a boy or girl who was born alive but later died?<br>IF NO, PROBE:<br>Any baby who cried or showed signs of life but did not survive?                                                                       | YES ..... 1<br>NO ..... 2                                                                                                                                                                                                                                                                                                                     | → 208 |  |       |  |  |  |  |  |  |
| 207 | a) How many boys have died?<br>b) And how many girls have died?<br><br>IF NONE, RECORD '00'.                                                                                                                                            | a) BOYS DEAD ..... <table border="1" style="display: inline-table; vertical-align: middle;"><tr><td> </td><td> </td></tr><tr><td> </td><td> </td></tr></table><br>b) GIRLS DEAD ..... <table border="1" style="display: inline-table; vertical-align: middle;"><tr><td> </td><td> </td></tr><tr><td> </td><td> </td></tr></table>             |       |  |       |  |  |  |  |  |  |
|     |                                                                                                                                                                                                                                         |                                                                                                                                                                                                                                                                                                                                               |       |  |       |  |  |  |  |  |  |
|     |                                                                                                                                                                                                                                         |                                                                                                                                                                                                                                                                                                                                               |       |  |       |  |  |  |  |  |  |
|     |                                                                                                                                                                                                                                         |                                                                                                                                                                                                                                                                                                                                               |       |  |       |  |  |  |  |  |  |
|     |                                                                                                                                                                                                                                         |                                                                                                                                                                                                                                                                                                                                               |       |  |       |  |  |  |  |  |  |
| 208 | SUM ANSWERS TO 203, 205, AND 207, AND ENTER TOTAL.<br>IF NONE, RECORD '00'.                                                                                                                                                             | TOTAL BIRTHS ..... <table border="1" style="display: inline-table; vertical-align: middle;"><tr><td> </td><td> </td></tr></table>                                                                                                                                                                                                             |       |  |       |  |  |  |  |  |  |
|     |                                                                                                                                                                                                                                         |                                                                                                                                                                                                                                                                                                                                               |       |  |       |  |  |  |  |  |  |
| 209 | CHECK 208:<br>Just to make sure that I have this right: you have had in TOTAL _____ births during your life. Is that correct?<br><br>YES <input type="checkbox"/> NO <input type="checkbox"/> → PROBE AND CORRECT 201-208 AS NECESSARY. |                                                                                                                                                                                                                                                                                                                                               |       |  |       |  |  |  |  |  |  |
| 210 | Now I'd like to ask you about your more recent births. How many births have you had in the last 6 years?<br><br>IF NONE, CIRCLE '00.'                                                                                                   | TOTAL IN THE LAST 6 YEARS ..... <table border="1" style="display: inline-table; vertical-align: middle;"><tr><td> </td><td> </td></tr></table><br>NONE ..... 00                                                                                                                                                                               |       |  | → 224 |  |  |  |  |  |  |
|     |                                                                                                                                                                                                                                         |                                                                                                                                                                                                                                                                                                                                               |       |  |       |  |  |  |  |  |  |

211 Now I would like to record the names of all your births in the last six years, whether still alive or not, starting with the most recent one you had.

RECORD NAMES OF ALL THE BIRTHS IN THE LAST 6 YEARS IN 212. RECORD TWINS AND TRIPLETS ON SEPARATE ROWS.

| 212                                                                                                   | 213                        | 214                             | 215                                                                                                                                         | 216                                             | 217                                                                                | 218                         | 219                                                                                     | 220                                                                                                                        |
|-------------------------------------------------------------------------------------------------------|----------------------------|---------------------------------|---------------------------------------------------------------------------------------------------------------------------------------------|-------------------------------------------------|------------------------------------------------------------------------------------|-----------------------------|-----------------------------------------------------------------------------------------|----------------------------------------------------------------------------------------------------------------------------|
| What name was given to your (most recent/previous ) baby?<br>RECORD NAME.<br><br>BIRTH HISTORY NUMBER | Is (NAME) a boy or a girl? | Were any of these births twins? | In what month and year was (NAME) born?<br><br>PROBE: When is his/her birthday?                                                             | Is (NAME) still alive?                          | How old was (NAME) at his/her last birthday?<br><br>RECORD AGE IN COMPLETED YEARS. | Is (NAME) living with you?  | RECORD HOUSEHOLD LINE NUMBER OF CHILD (RECORD '00' IF CHILD NOT LISTED IN HOUSEHOLD).   | Were there any other live births between (NAME) and (NAME OF PREVIOUS BIRTH), including any children who died after birth? |
| 01                                                                                                    | BOY 1<br>GIRL 2            | SING 1<br>MULT 2                | MONTH <input type="text"/> <input type="text"/><br>YEAR <input type="text"/> <input type="text"/> <input type="text"/> <input type="text"/> | YES . . . . 1<br>NO . . . . 2<br>(NEXT BIRTH) ↙ | AGE IN YEARS<br><input type="text"/> <input type="text"/>                          | YES . . . 1<br>NO . . . . 2 | HOUSEHOLD LINE NUMBER<br><input type="text"/> <input type="text"/><br>↓<br>(NEXT BIRTH) |                                                                                                                            |
| 02                                                                                                    | BOY 1<br>GIRL 2            | SING 1<br>MULT 2                | MONTH <input type="text"/> <input type="text"/><br>YEAR <input type="text"/> <input type="text"/> <input type="text"/> <input type="text"/> | YES . . . . 1<br>NO . . . . 2<br>↓<br>220       | AGE IN YEARS<br><input type="text"/> <input type="text"/>                          | YES . . . 1<br>NO . . . . 2 | HOUSEHOLD LINE NUMBER<br><input type="text"/> <input type="text"/>                      | YES . . . . . 1<br>ADD ↙<br>BIRTH<br>NO . . . . . 2<br>NEXT ↙<br>BIRTH                                                     |
| 03                                                                                                    | BOY 1<br>GIRL 2            | SING 1<br>MULT 2                | MONTH <input type="text"/> <input type="text"/><br>YEAR <input type="text"/> <input type="text"/> <input type="text"/> <input type="text"/> | YES . . . . 1<br>NO . . . . 2<br>↓<br>220       | AGE IN YEARS<br><input type="text"/> <input type="text"/>                          | YES . . . 1<br>NO . . . . 2 | HOUSEHOLD LINE NUMBER<br><input type="text"/> <input type="text"/>                      | YES . . . . . 1<br>ADD ↙<br>BIRTH<br>NO . . . . . 2<br>NEXT ↙<br>BIRTH                                                     |
| 04                                                                                                    | BOY 1<br>GIRL 2            | SING 1<br>MULT 2                | MONTH <input type="text"/> <input type="text"/><br>YEAR <input type="text"/> <input type="text"/> <input type="text"/> <input type="text"/> | YES . . . . 1<br>NO . . . . 2<br>↓<br>220       | AGE IN YEARS<br><input type="text"/> <input type="text"/>                          | YES . . . 1<br>NO . . . . 2 | HOUSEHOLD LINE NUMBER<br><input type="text"/> <input type="text"/>                      | YES . . . . . 1<br>ADD ↙<br>BIRTH<br>NO . . . . . 2<br>NEXT ↙<br>BIRTH                                                     |
| 05                                                                                                    | BOY 1<br>GIRL 2            | SING 1<br>MULT 2                | MONTH <input type="text"/> <input type="text"/><br>YEAR <input type="text"/> <input type="text"/> <input type="text"/> <input type="text"/> | YES . . . . 1<br>NO . . . . 2<br>↓<br>220       | AGE IN YEARS<br><input type="text"/> <input type="text"/>                          | YES . . . 1<br>NO . . . . 2 | HOUSEHOLD LINE NUMBER<br><input type="text"/> <input type="text"/>                      | YES . . . . . 1<br>ADD ↙<br>BIRTH<br>NO . . . . . 2<br>NEXT ↙<br>BIRTH                                                     |
| 06                                                                                                    | BOY 1<br>GIRL 2            | SING 1<br>MULT 2                | MONTH <input type="text"/> <input type="text"/><br>YEAR <input type="text"/> <input type="text"/> <input type="text"/> <input type="text"/> | YES . . . . 1<br>NO . . . . 2<br>↓<br>220       | AGE IN YEARS<br><input type="text"/> <input type="text"/>                          | YES . . . 1<br>NO . . . . 2 | HOUSEHOLD LINE NUMBER<br><input type="text"/> <input type="text"/>                      | YES . . . . . 1<br>ADD ↙<br>BIRTH<br>NO . . . . . 2<br>NEXT ↙<br>BIRTH                                                     |
| 07                                                                                                    | BOY 1<br>GIRL 2            | SING 1<br>MULT 2                | MONTH <input type="text"/> <input type="text"/><br>YEAR <input type="text"/> <input type="text"/> <input type="text"/> <input type="text"/> | YES . . . . 1<br>NO . . . . 2<br>↓<br>220       | AGE IN YEARS<br><input type="text"/> <input type="text"/>                          | YES . . . 1<br>NO . . . . 2 | HOUSEHOLD LINE NUMBER<br><input type="text"/> <input type="text"/>                      | YES . . . . . 1<br>ADD ↙<br>BIRTH<br>NO . . . . . 2                                                                        |





|      |                                                                                                                                  |                                                                                                                                                                                                  |  |
|------|----------------------------------------------------------------------------------------------------------------------------------|--------------------------------------------------------------------------------------------------------------------------------------------------------------------------------------------------|--|
| 307  | How many times did you take (SP/Fansidar) during this pregnancy?                                                                 | TIMES ..... <input type="text"/> <input type="text"/>                                                                                                                                            |  |
| 307A | CHECK 307:<br><br>TOOK SP ONLY 1 TIME DURING THIS PREGNANCY                                                                      | CODE '01' TIMES ENTERED <input type="checkbox"/><br>↓<br>OTHER <input type="checkbox"/> → 308                                                                                                    |  |
| 307B | Why did you take (SP/Fansidar) only one time during this pregnancy?                                                              | CLINIC TOO FAR ..... 1<br>HAD NO MONEY ..... 2<br>SIDE EFFECTS ..... 3<br>NOT AWARE HAD TO TAKE MORE . . . 4<br>DID NOT WANT TO TAKE ..... 5<br>OTHER _____ 6<br>(SPECIFY)<br>DON'T KNOW ..... 8 |  |
| 308  | CHECK 303:<br><br>ANTENATAL CARE FROM HEALTH PERSONNEL DURING THIS PREGNANCY                                                     | CODE 'A', 'B', 'C', OR 'D' CIRCLED <input type="checkbox"/><br>↓<br>OTHER <input type="checkbox"/> → 310                                                                                         |  |
| 309  | Did you get the (SP/Fansidar) during any antenatal care visit, during another visit to a health facility or from another source? | ANTENATAL VISIT ..... 1<br>ANOTHER FACILITY VISIT ..... 2<br>OTHER SOURCE ..... 6                                                                                                                |  |
| 310  | CHECK 215 AND 216:<br><br>ONE OR MORE LIVING CHILDREN BORN IN 2008 OR LATER                                                      | NO LIVING CHILDREN BORN IN 2008 OR LATER <input type="checkbox"/> → 426<br><br>↓<br>GO TO 401                                                                                                    |  |



SECTION 4. FEVER IN CHILDREN

|      |                                                                                                                                                                                                                                                                                                                                                                                                                            |                                                                                                                                                                                                                                                                               |                                                                                                                                                                                                                                                                               |                                                                                                                                                                                                                                                                               |
|------|----------------------------------------------------------------------------------------------------------------------------------------------------------------------------------------------------------------------------------------------------------------------------------------------------------------------------------------------------------------------------------------------------------------------------|-------------------------------------------------------------------------------------------------------------------------------------------------------------------------------------------------------------------------------------------------------------------------------|-------------------------------------------------------------------------------------------------------------------------------------------------------------------------------------------------------------------------------------------------------------------------------|-------------------------------------------------------------------------------------------------------------------------------------------------------------------------------------------------------------------------------------------------------------------------------|
| 401  | <p>CHECK 215: ENTER IN THE TABLE THE BIRTH HISTORY NUMBER, NAME, AND SURVIVAL STATUS OF EACH BIRTH IN 2008 OR LATER. ASK THE QUESTIONS ABOUT ALL OF THESE BIRTHS. BEGIN WITH THE MOST RECENT BIRTH. (IF THERE ARE MORE THAN 3 BIRTHS, USE AN ADDITIONAL QUESTIONNAIRE).</p> <p>Now I would like to ask some questions about the health of your children born since January 2008. (We will talk about each separately.)</p> |                                                                                                                                                                                                                                                                               |                                                                                                                                                                                                                                                                               |                                                                                                                                                                                                                                                                               |
| 402  | <p>BIRTH HISTORY NUMBER FROM 212 IN BIRTH HISTORY</p>                                                                                                                                                                                                                                                                                                                                                                      | <p>MOST RECENT BIRTH</p> <p>BIRTH HISTORY NUMBER <input type="text"/> <input type="text"/></p>                                                                                                                                                                                | <p>SECOND MOST RECENT BIRTH</p> <p>BIRTH HISTORY NUMBER <input type="text"/> <input type="text"/></p>                                                                                                                                                                         | <p>THIRD MOST RECENT BIRTH</p> <p>BIRTH HISTORY NUMBER <input type="text"/> <input type="text"/></p>                                                                                                                                                                          |
| 403  | <p>FROM 212 AND 216</p>                                                                                                                                                                                                                                                                                                                                                                                                    | <p>NAME _____</p> <p>LIVING <input type="checkbox"/> DEAD <input type="checkbox"/></p> <p style="text-align: center;">↓ ↓</p> <p style="text-align: center;">(GO TO 403 IN NEXT COLUMN OR, IF NO MORE BIRTHS, GO TO 426)</p>                                                  | <p>NAME _____</p> <p>LIVING <input type="checkbox"/> DEAD <input type="checkbox"/></p> <p style="text-align: center;">↓ ↓</p> <p style="text-align: center;">(GO TO 403 IN NEXT COLUMN OR, IF NO MORE BIRTHS, GO TO 426)</p>                                                  | <p>NAME _____</p> <p>LIVING <input type="checkbox"/> DEAD <input type="checkbox"/></p> <p style="text-align: center;">↓ ↓</p> <p style="text-align: center;">(GO TO 403 IN MOST RECENT COLUMN OF NEW QUESTIONNAIRE; OR, IF NO MORE BIRTHS, GO TO 426)</p>                     |
| 404  | <p>Has (NAME) been ill with a fever at any time in the last 2 weeks?</p>                                                                                                                                                                                                                                                                                                                                                   | <p>YES ..... 1<br/>NO ..... 2</p> <p style="text-align: center;">(GO TO 403 IN NEXT COLUMN OR, IF NO MORE BIRTHS, GO TO 426)</p> <p>DON'T KNOW ..... 8</p>                                                                                                                    | <p>YES ..... 1<br/>NO ..... 2</p> <p style="text-align: center;">(GO TO 403 IN NEXT COLUMN OR, IF NO MORE BIRTHS, GO TO 426)</p> <p>DON'T KNOW ..... 8</p>                                                                                                                    | <p>YES ..... 1<br/>NO ..... 2</p> <p style="text-align: center;">(GO TO 403 IN MOST RECENT COLUMN OF NEW QUESTIONNAIRE; OR, IF NO MORE BIRTHS, GO TO 426)</p> <p>DON'T KNOW ..... 8</p>                                                                                       |
| 405  | <p>At any time during the illness, did (NAME) have blood taken from his/her finger or heel for testing?</p>                                                                                                                                                                                                                                                                                                                | <p>YES ..... 1<br/>NO ..... 2<br/>DON'T KNOW ..... 8</p>                                                                                                                                                                                                                      | <p>YES ..... 1<br/>NO ..... 2<br/>DON'T KNOW ..... 8</p>                                                                                                                                                                                                                      | <p>YES ..... 1<br/>NO ..... 2<br/>DON'T KNOW ..... 8</p>                                                                                                                                                                                                                      |
| 406  | <p>Did you seek advice or treatment for the illness from any source?</p>                                                                                                                                                                                                                                                                                                                                                   | <p>YES ..... 1<br/>(SKIP TO 407) ←</p> <p>NO ..... 2</p>                                                                                                                                                                                                                      | <p>YES ..... 1<br/>(SKIP TO 407) ←</p> <p>NO ..... 2</p>                                                                                                                                                                                                                      | <p>YES ..... 1<br/>(SKIP TO 407) ←</p> <p>NO ..... 2</p>                                                                                                                                                                                                                      |
| 406A | <p>Why have you not sought advice or treatment from any source?</p>                                                                                                                                                                                                                                                                                                                                                        | <p>CHILD JUST FELL ILL .. A<br/>CHILD NOT VERY ILL .. B<br/>CLINIC TOO FAR .... C<br/>HAVE NO MONEY ... D<br/>WAITING FOR CHILD'S FATHER ..... E<br/>DON'T KNOW WHAT TO DO ..... F<br/>ALREADY HAD MEDICINE AT HOME . G<br/>OTHER _____ X<br/>(SPECIFY)<br/>SKIP TO 410 ←</p> | <p>CHILD JUST FELL ILL .. A<br/>CHILD NOT VERY ILL .. B<br/>CLINIC TOO FAR .... C<br/>HAVE NO MONEY ... D<br/>WAITING FOR CHILD'S FATHER ..... E<br/>DON'T KNOW WHAT TO DO ..... F<br/>ALREADY HAD MEDICINE AT HOME . G<br/>OTHER _____ X<br/>(SPECIFY)<br/>SKIP TO 410 ←</p> | <p>CHILD JUST FELL ILL .. A<br/>CHILD NOT VERY ILL .. B<br/>CLINIC TOO FAR .... C<br/>HAVE NO MONEY ... D<br/>WAITING FOR CHILD'S FATHER ..... E<br/>DON'T KNOW WHAT TO DO ..... F<br/>ALREADY HAD MEDICINE AT HOME . G<br/>OTHER _____ X<br/>(SPECIFY)<br/>SKIP TO 410 ←</p> |

| NO. | QUESTIONS AND FILTERS                                                                                                                                                                                                                             | MOST RECENT BIRTH<br>NAME _____                                                                                                                                                                                                                                                                                                                                                                                                                                                                                                                                                                                                                                                                           | SECOND MOST RECENT BIRTH<br>NAME _____                                                                                                                                                                                                                                                                                                                                                                                                                                                                                                                                                                                                                                                                    | THIRD MOST RECENT BIRTH<br>NAME _____                                                                                                                                                                                                                                                                                                                                                                                                                                                                                                                                                                                                                                                                     |
|-----|---------------------------------------------------------------------------------------------------------------------------------------------------------------------------------------------------------------------------------------------------|-----------------------------------------------------------------------------------------------------------------------------------------------------------------------------------------------------------------------------------------------------------------------------------------------------------------------------------------------------------------------------------------------------------------------------------------------------------------------------------------------------------------------------------------------------------------------------------------------------------------------------------------------------------------------------------------------------------|-----------------------------------------------------------------------------------------------------------------------------------------------------------------------------------------------------------------------------------------------------------------------------------------------------------------------------------------------------------------------------------------------------------------------------------------------------------------------------------------------------------------------------------------------------------------------------------------------------------------------------------------------------------------------------------------------------------|-----------------------------------------------------------------------------------------------------------------------------------------------------------------------------------------------------------------------------------------------------------------------------------------------------------------------------------------------------------------------------------------------------------------------------------------------------------------------------------------------------------------------------------------------------------------------------------------------------------------------------------------------------------------------------------------------------------|
| 407 | <p>Where did you seek advice or treatment?</p> <p>Anywhere else?</p> <p>PROBE TO IDENTIFY EACH TYPE OF SOURCE.</p> <p>IF UNABLE TO DETERMINE IF PUBLIC OR PRIVATE SECTOR, WRITE THE NAME OF THE PLACE.</p> <p>_____</p> <p>(NAME OF PLACE(S))</p> | <p>PUBLIC SECTOR (GOVERNMENT)</p> <p>GOVT HOSPITAL . . . A</p> <p>GOVT HEALTH CENTER . . . . . B</p> <p>GOVT HEALTH POST . . . . . C</p> <p>MOBILE CLINIC . . . D</p> <p>COMMUNITY HEALTH WORKER(VHT) . E</p> <p>OTHER PUBLIC SECTOR _____ F</p> <p>(SPECIFY)</p> <p>PUBLIC SECTOR (PNFP) HOSPITAL . . . . . G</p> <p>HEALTH CENTER . H</p> <p>PRIVATE MEDICAL SECTOR</p> <p>PVT HOSPITAL/ CLINIC . . . . . I</p> <p>PHARMACY . . . J</p> <p>MOBILE CLINIC . . . K</p> <p>FIELDWORKER . . L</p> <p>OTHER PRIVATE MED. SECTOR _____ M</p> <p>(SPECIFY)</p> <p>OTHER SOURCE</p> <p>SHOP . . . . . N</p> <p>TRADITIONAL PRACTITIONER . O</p> <p>MARKET . . . . . P</p> <p>OTHER _____ X</p> <p>(SPECIFY)</p> | <p>PUBLIC SECTOR (GOVERNMENT)</p> <p>GOVT HOSPITAL . . . A</p> <p>GOVT HEALTH CENTER . . . . . B</p> <p>GOVT HEALTH POST . . . . . C</p> <p>MOBILE CLINIC . . . D</p> <p>COMMUNITY HEALTH WORKER(VHT) . E</p> <p>OTHER PUBLIC SECTOR _____ F</p> <p>(SPECIFY)</p> <p>PUBLIC SECTOR (PNFP) HOSPITAL . . . . . G</p> <p>HEALTH CENTER . H</p> <p>PRIVATE MEDICAL SECTOR</p> <p>PVT HOSPITAL/ CLINIC . . . . . I</p> <p>PHARMACY . . . J</p> <p>MOBILE CLINIC . . . K</p> <p>FIELDWORKER . . L</p> <p>OTHER PRIVATE MED. SECTOR _____ M</p> <p>(SPECIFY)</p> <p>OTHER SOURCE</p> <p>SHOP . . . . . N</p> <p>TRADITIONAL PRACTITIONER . O</p> <p>MARKET . . . . . P</p> <p>OTHER _____ X</p> <p>(SPECIFY)</p> | <p>PUBLIC SECTOR (GOVERNMENT)</p> <p>GOVT HOSPITAL . . . A</p> <p>GOVT HEALTH CENTER . . . . . B</p> <p>GOVT HEALTH POST . . . . . C</p> <p>MOBILE CLINIC . . . D</p> <p>COMMUNITY HEALTH WORKER(VHT) . E</p> <p>OTHER PUBLIC SECTOR _____ F</p> <p>(SPECIFY)</p> <p>PUBLIC SECTOR (PNFP) HOSPITAL . . . . . G</p> <p>HEALTH CENTER . H</p> <p>PRIVATE MEDICAL SECTOR</p> <p>PVT HOSPITAL/ CLINIC . . . . . I</p> <p>PHARMACY . . . J</p> <p>MOBILE CLINIC . . . K</p> <p>FIELDWORKER . . L</p> <p>OTHER PRIVATE MED. SECTOR _____ M</p> <p>(SPECIFY)</p> <p>OTHER SOURCE</p> <p>SHOP . . . . . N</p> <p>TRADITIONAL PRACTITIONER . O</p> <p>MARKET . . . . . P</p> <p>OTHER _____ X</p> <p>(SPECIFY)</p> |
| 408 | CHECK 407:                                                                                                                                                                                                                                        | <p>TWO OR ONLY MORE ONE CODES CODE CIRCLED CIRCLED</p> <p>(SKIP TO 410) ←</p>                                                                                                                                                                                                                                                                                                                                                                                                                                                                                                                                                                                                                             | <p>TWO OR ONLY MORE ONE CODES CODE CIRCLED CIRCLED</p> <p>(SKIP TO 410) ←</p>                                                                                                                                                                                                                                                                                                                                                                                                                                                                                                                                                                                                                             | <p>TWO OR ONLY MORE ONE CODES CODE CIRCLED CIRCLED</p> <p>(SKIP TO 410) ←</p>                                                                                                                                                                                                                                                                                                                                                                                                                                                                                                                                                                                                                             |
| 409 | <p>Where did you first seek advice or treatment?</p> <p>USE LETTER CODE FROM 407.</p>                                                                                                                                                             | FIRST PLACE . . . <input type="checkbox"/>                                                                                                                                                                                                                                                                                                                                                                                                                                                                                                                                                                                                                                                                | FIRST PLACE . . . <input type="checkbox"/>                                                                                                                                                                                                                                                                                                                                                                                                                                                                                                                                                                                                                                                                | FIRST PLACE . . . <input type="checkbox"/>                                                                                                                                                                                                                                                                                                                                                                                                                                                                                                                                                                                                                                                                |
| 410 | At any time during the illness, did (NAME) take any drugs for the illness?                                                                                                                                                                        | <p>YES . . . . . 1</p> <p>NO . . . . . 2</p> <p>(GO BACK TO 403 IN NEXT COLUMN; OR, IF NO MORE BIRTHS, GO TO 426)</p> <p>DON'T KNOW . . . . . 8</p>                                                                                                                                                                                                                                                                                                                                                                                                                                                                                                                                                       | <p>YES . . . . . 1</p> <p>NO . . . . . 2</p> <p>(GO BACK TO 403 IN NEXT COLUMN; OR, IF NO MORE BIRTHS, GO TO 426)</p> <p>DON'T KNOW . . . . . 8</p>                                                                                                                                                                                                                                                                                                                                                                                                                                                                                                                                                       | <p>YES . . . . . 1</p> <p>NO . . . . . 2</p> <p>(GO TO 403 IN MOST RECENT COLUMN OF NEW QUESTIONNAIRE; OR, IF NO MORE BIRTHS, GO TO 426)</p> <p>DON'T KNOW . . . . . 8</p>                                                                                                                                                                                                                                                                                                                                                                                                                                                                                                                                |

| NO. | QUESTIONS AND FILTERS                                                            | MOST RECENT BIRTH<br>NAME _____                                                                                                                                                                                                                                                                                                                                                      | SECOND MOST RECENT BIRTH<br>NAME _____                                                                                                                                                                                                                                                                                                                                             | THIRD MOST RECENT BIRTH<br>NAME _____                                                                                                                                                                                                                                                                                                                                                |
|-----|----------------------------------------------------------------------------------|--------------------------------------------------------------------------------------------------------------------------------------------------------------------------------------------------------------------------------------------------------------------------------------------------------------------------------------------------------------------------------------|------------------------------------------------------------------------------------------------------------------------------------------------------------------------------------------------------------------------------------------------------------------------------------------------------------------------------------------------------------------------------------|--------------------------------------------------------------------------------------------------------------------------------------------------------------------------------------------------------------------------------------------------------------------------------------------------------------------------------------------------------------------------------------|
| 411 | What drugs did (NAME) take?<br><br>Any other drugs?<br><br>RECORD ALL MENTIONED. | ANTIMALARIAL DRUGS<br>SP/FANSIDAR ... A<br>CHLOROQUINE .. B<br>AMODIAQUINE .. C<br>QUININE ..... D<br>COARTEM/ACT .. E<br><br>OTHER ANTI-MALARIAL<br>_____ ... F<br>(SPECIFY)<br><br>ANTIBIOTIC DRUGS<br>PILL/SYRUP ... G<br>INJECTION ..... H<br><br>OTHER DRUGS<br>ASPIRIN ..... I<br>PANADOL ..... J<br>IBUPROFEN ..... K<br><br>OTHER _____ X<br>(SPECIFY)<br>DON'T KNOW ..... Z | ANTIMALARIAL DRUGS<br>SP/FANSIDAR ... A<br>CHLOROQUINE .. B<br>AMODIAQUINE .. C<br>QUININE ..... D<br>COARTEM/ACT .. E<br><br>OTHER ANTI-MALARIAL<br>_____ ... F<br>(SPECIFY)<br><br>ANTIBIOTIC DRUGS<br>PILL/SYRUP ... G<br>INJECTION ..... H<br><br>OTHER DRUGS<br>ASPIRIN ..... I<br>PANADOL ..... J<br>IBUPROFEN ... K<br><br>OTHER _____ X<br>(SPECIFY)<br>DON'T KNOW ..... Z | ANTIMALARIAL DRUGS<br>SP/FANSIDAR ... A<br>CHLOROQUINE .. B<br>AMODIAQUINE .. C<br>QUININE ..... D<br>COARTEM/ACT .. E<br><br>OTHER ANTI-MALARIAL<br>_____ ... F<br>(SPECIFY)<br><br>ANTIBIOTIC DRUGS<br>PILL/SYRUP ... G<br>INJECTION ..... H<br><br>OTHER DRUGS<br>ASPIRIN ..... I<br>PANADOL ..... J<br>IBUPROFEN ..... K<br><br>OTHER _____ X<br>(SPECIFY)<br>DON'T KNOW ..... Z |
| 412 | CHECK 411:<br>ANY CODE A-F CIRCLED?                                              | YES <input type="checkbox"/> NO <input type="checkbox"/><br>(GO BACK TO 403 IN NEXT COLUMN; OR, IF NO MORE BIRTHS, GO TO 426)                                                                                                                                                                                                                                                        | YES <input type="checkbox"/> NO <input type="checkbox"/><br>(GO BACK TO 403 IN NEXT COLUMN; OR, IF NO MORE BIRTHS, GO TO 426)                                                                                                                                                                                                                                                      | YES <input type="checkbox"/> NO <input type="checkbox"/><br>(GO TO 403 IN MOST RECENT COLUMN OF NEW QUESTIONNAIRE; OR, IF NO MORE BIRTHS, GO TO 426)                                                                                                                                                                                                                                 |
| 413 | CHECK 411:<br>SP/FANSIDAR ('A') GIVEN                                            | CODE 'A' CIRCLED <input type="checkbox"/> CODE 'A' NOT CIRCLED <input type="checkbox"/><br>(SKIP TO 415)                                                                                                                                                                                                                                                                             | CODE 'A' CIRCLED <input type="checkbox"/> CODE 'A' NOT CIRCLED <input type="checkbox"/><br>(SKIP TO 415)                                                                                                                                                                                                                                                                           | CODE 'A' CIRCLED <input type="checkbox"/> CODE 'A' NOT CIRCLED <input type="checkbox"/><br>(SKIP TO 415)                                                                                                                                                                                                                                                                             |
| 414 | How long after the fever started did (NAME) first take (SP/Fansidar)?            | SAME DAY ..... 0<br>NEXT DAY ..... 1<br>TWO DAYS AFTER FEVER ..... 2<br>THREE OR MORE DAYS AFTER FEVER ..... 3<br>DON'T KNOW ... 8                                                                                                                                                                                                                                                   | SAME DAY ..... 0<br>NEXT DAY ..... 1<br>TWO DAYS AFTER FEVER ..... 2<br>THREE OR MORE DAYS AFTER FEVER ..... 3<br>DON'T KNOW ... 8                                                                                                                                                                                                                                                 | SAME DAY ..... 0<br>NEXT DAY ..... 1<br>TWO DAYS AFTER FEVER ..... 2<br>THREE OR MORE DAYS AFTER FEVER ..... 3<br>DON'T KNOW ... 8                                                                                                                                                                                                                                                   |
| 415 | CHECK 411:<br>CHLOROQUINE ('B') GIVEN                                            | CODE 'B' CIRCLED <input type="checkbox"/> CODE 'B' NOT CIRCLED <input type="checkbox"/><br>(SKIP TO 417)                                                                                                                                                                                                                                                                             | CODE 'B' CIRCLED <input type="checkbox"/> CODE 'B' NOT CIRCLED <input type="checkbox"/><br>(SKIP TO 417)                                                                                                                                                                                                                                                                           | CODE 'B' CIRCLED <input type="checkbox"/> CODE 'B' NOT CIRCLED <input type="checkbox"/><br>(SKIP TO 417)                                                                                                                                                                                                                                                                             |

| NO. | QUESTIONS AND FILTERS                                               | MOST RECENT BIRTH<br>NAME _____                                                                                                                                           | SECOND MOST RECENT BIRTH<br>NAME _____                                                                                                                                    | THIRD MOST RECENT BIRTH<br>NAME _____                                                                                                                                     |
|-----|---------------------------------------------------------------------|---------------------------------------------------------------------------------------------------------------------------------------------------------------------------|---------------------------------------------------------------------------------------------------------------------------------------------------------------------------|---------------------------------------------------------------------------------------------------------------------------------------------------------------------------|
| 416 | How long after the fever started did (NAME) first take chloroquine? | SAME DAY ..... 0<br>NEXT DAY ..... 1<br>TWO DAYS AFTER<br>FEVER ..... 2<br>THREE OR MORE<br>DAYS AFTER<br>FEVER ..... 3<br>DON'T KNOW ... 8                               | SAME DAY ..... 0<br>NEXT DAY ..... 1<br>TWO DAYS AFTER<br>FEVER ..... 2<br>THREE OR MORE<br>DAYS AFTER<br>FEVER ..... 3<br>DON'T KNOW ... 8                               | SAME DAY ..... 0<br>NEXT DAY ..... 1<br>TWO DAYS AFTER<br>FEVER ..... 2<br>THREE OR MORE<br>DAYS AFTER<br>FEVER ..... 3<br>DON'T KNOW ... 8                               |
| 417 | CHECK 411:<br><br>AMODIAQUINE ('C') GIVEN                           | CODE 'C'      CODE 'C'<br>CIRCLED      NOT<br>CIRCLED<br><input type="checkbox"/> <input type="checkbox"/><br>↓                                      ↓<br>(SKIP TO 419) ← | CODE 'C'      CODE 'C'<br>CIRCLED      NOT<br>CIRCLED<br><input type="checkbox"/> <input type="checkbox"/><br>↓                                      ↓<br>(SKIP TO 419) ← | CODE 'C'      CODE 'C'<br>CIRCLED      NOT<br>CIRCLED<br><input type="checkbox"/> <input type="checkbox"/><br>↓                                      ↓<br>(SKIP TO 419) ← |
| 418 | How long after the fever started did (NAME) first take amodiaquine? | SAME DAY ..... 0<br>NEXT DAY ..... 1<br>TWO DAYS AFTER<br>FEVER ..... 2<br>THREE OR MORE<br>DAYS AFTER<br>FEVER ..... 3<br>DON'T KNOW ... 8                               | SAME DAY ..... 0<br>NEXT DAY ..... 1<br>TWO DAYS AFTER<br>FEVER ..... 2<br>THREE OR MORE<br>DAYS AFTER<br>FEVER ..... 3<br>DON'T KNOW ... 8                               | SAME DAY ..... 0<br>NEXT DAY ..... 1<br>TWO DAYS AFTER<br>FEVER ..... 2<br>THREE OR MORE<br>DAYS AFTER<br>FEVER ..... 3<br>DON'T KNOW ... 8                               |
| 419 | CHECK 411:<br><br>QUININE ('D') GIVEN                               | CODE 'D'      CODE 'D'<br>CIRCLED      NOT<br>CIRCLED<br><input type="checkbox"/> <input type="checkbox"/><br>↓                                      ↓<br>(SKIP TO 421) ← | CODE 'D'      CODE 'D'<br>CIRCLED      NOT<br>CIRCLED<br><input type="checkbox"/> <input type="checkbox"/><br>↓                                      ↓<br>(SKIP TO 421) ← | CODE 'D'      CODE 'D'<br>CIRCLED      NOT<br>CIRCLED<br><input type="checkbox"/> <input type="checkbox"/><br>↓                                      ↓<br>(SKIP TO 421) ← |
| 420 | How long after the fever started did (NAME) first take quinine?     | SAME DAY ..... 0<br>NEXT DAY ..... 1<br>TWO DAYS AFTER<br>FEVER ..... 2<br>THREE OR MORE<br>DAYS AFTER<br>FEVER ..... 3<br>DON'T KNOW ... 8                               | SAME DAY ..... 0<br>NEXT DAY ..... 1<br>TWO DAYS AFTER<br>FEVER ..... 2<br>THREE OR MORE<br>DAYS AFTER<br>FEVER ..... 3<br>DON'T KNOW ... 8                               | SAME DAY ..... 0<br>NEXT DAY ..... 1<br>TWO DAYS AFTER<br>FEVER ..... 2<br>THREE OR MORE<br>DAYS AFTER<br>FEVER ..... 3<br>DON'T KNOW ... 8                               |
| 421 | CHECK 411:<br><br>COMBINATION WITH<br>COARTEM/ACT ('E') GIVEN       | CODE 'E'      CODE 'E'<br>CIRCLED      NOT<br>CIRCLED<br><input type="checkbox"/> <input type="checkbox"/><br>↓                                      ↓<br>(SKIP TO 423) ← | CODE 'E'      CODE 'E'<br>CIRCLED      NOT<br>CIRCLED<br><input type="checkbox"/> <input type="checkbox"/><br>↓                                      ↓<br>(SKIP TO 423) ← | CODE 'E'      CODE 'E'<br>CIRCLED      NOT<br>CIRCLED<br><input type="checkbox"/> <input type="checkbox"/><br>↓                                      ↓<br>(SKIP TO 423) ← |
| 422 | How long after the fever started did (NAME) first take COARTEM/ACT? | SAME DAY ..... 0<br>NEXT DAY ..... 1<br>TWO DAYS AFTER<br>FEVER ..... 2<br>THREE OR MORE<br>DAYS AFTER<br>FEVER ..... 3<br>DON'T KNOW ... 8                               | SAME DAY ..... 0<br>NEXT DAY ..... 1<br>TWO DAYS AFTER<br>FEVER ..... 2<br>THREE OR MORE<br>DAYS AFTER<br>FEVER ..... 3<br>DON'T KNOW ... 8                               | SAME DAY ..... 0<br>NEXT DAY ..... 1<br>TWO DAYS AFTER<br>FEVER ..... 2<br>THREE OR MORE<br>DAYS AFTER<br>FEVER ..... 3<br>DON'T KNOW ... 8                               |

| NO.  | QUESTIONS AND FILTERS                                                        | MOST RECENT BIRTH<br>NAME _____                                                                                                                                 | SECOND MOST RECENT BIRTH<br>NAME _____                                                                                                                          | THIRD MOST RECENT BIRTH<br>NAME _____                                                                                                                                                  |
|------|------------------------------------------------------------------------------|-----------------------------------------------------------------------------------------------------------------------------------------------------------------|-----------------------------------------------------------------------------------------------------------------------------------------------------------------|----------------------------------------------------------------------------------------------------------------------------------------------------------------------------------------|
| 422A | For how many day did (NAME) take COATREM/ACT?                                | DAYS ... <input type="text"/> <input type="text"/><br>STILL TAKING .....95<br>DON'T KNOW .....98                                                                | DAYS ... <input type="text"/> <input type="text"/><br>STILL TAKING .....95<br>DON'T KNOW .....98                                                                | DAYS ... <input type="text"/> <input type="text"/><br>STILL TAKING .....95<br>DON'T KNOW .....98                                                                                       |
| 423  | CHECK 411:<br><br>OTHER ANTIMALARIAL ('F') GIVEN                             | CODE 'F' CIRCLED <input type="checkbox"/><br>CODE 'F' NOT CIRCLED <input type="checkbox"/><br>(GO BACK TO 403 IN NEXT COLUMN; OR, IF NO MORE BIRTHS, GO TO 426) | CODE 'F' CIRCLED <input type="checkbox"/><br>CODE 'F' NOT CIRCLED <input type="checkbox"/><br>(GO BACK TO 403 IN NEXT COLUMN; OR, IF NO MORE BIRTHS, GO TO 426) | CODE 'F' CIRCLED <input type="checkbox"/><br>CODE 'F' NOT CIRCLED <input type="checkbox"/><br>(GO TO 403 IN MOST RECENT COLUMN OF NEW QUESTIONNAIRE; OR, IF NO MORE BIRTHS, GO TO 426) |
| 424  | How long after the fever started did (NAME) first take (OTHER ANTIMALARIAL)? | SAME DAY ..... 0<br>NEXT DAY ..... 1<br>TWO DAYS AFTER FEVER ..... 2<br>THREE OR MORE DAYS AFTER FEVER ..... 3<br>DON'T KNOW ... 8                              | SAME DAY ..... 0<br>NEXT DAY ..... 1<br>TWO DAYS AFTER FEVER ..... 2<br>THREE OR MORE DAYS AFTER FEVER ..... 3<br>DON'T KNOW ... 8                              | SAME DAY ..... 0<br>NEXT DAY ..... 1<br>TWO DAYS AFTER FEVER ..... 2<br>THREE OR MORE DAYS AFTER FEVER ..... 3<br>DON'T KNOW ... 8                                                     |
| 425  |                                                                              | GO BACK TO 403 IN NEXT COLUMN; OR, IF NO MORE BIRTHS, GO TO 426.                                                                                                | GO BACK TO 403 IN NEXT COLUMN; OR, IF NO MORE BIRTHS, GO TO 426.                                                                                                | GO TO 403 IN MOST RECENT COLUMN OF NEW QUESTIONNAIRE; OR, IF NO MORE BIRTHS, GO TO 426.                                                                                                |

| NO. | QUESTIONS AND FILTERS                                                                                                                                                             | CODING CATEGORIES                                                                                                                                                                                                                                                                                                                                               | SKIP  |
|-----|-----------------------------------------------------------------------------------------------------------------------------------------------------------------------------------|-----------------------------------------------------------------------------------------------------------------------------------------------------------------------------------------------------------------------------------------------------------------------------------------------------------------------------------------------------------------|-------|
| 426 | I would like to ask you a few questions about fever in children.<br><br>When a child is sick with fever, how long after the fever begins should the child be taken for treatment? | SAME DAY ..... 01<br>NEXT DAY ..... 02<br>TWO DAYS AFTER ONSET<br>OF FEVER ..... 03<br>THREE OR MORE DAYS AFTER<br>ONSET OF FEVER ..... 04<br>FEVER IS NORMAL IN CHILDREN,<br>NO TREATMENT NECESSARY ... 05<br>DEPENDS ON HOW SERIOUS THE<br>FEVER IS ..... 06<br>OTHER ..... 96<br>(SPECIFY)<br>DONT KNOW ..... 98                                             |       |
| 427 | In your opinion, what causes malaria?<br><br>PROBE: Anything else?<br><br>RECORD ALL MENTIONED                                                                                    | MOSQUITO BITES ..... A<br>PARASITE ..... B<br>EATING MAIZE ..... C<br>EATING MANGOES ..... D<br>EATING DIRTY FOOD ..... E<br>DRINKING UNBOILED WATER ..... F<br>GETTING SOAKED WITH RAIN ..... G<br>COLD/CHANGING WEATHER ..... H<br>WITCHCRAFT ..... I<br>CONTACT WITH INFECTED PERSON .. J<br>GERM ..... K<br>OTHER ..... X<br>(SPECIFY)<br>DONT KNOW ..... Z |       |
| 428 | Are there ways to avoid getting malaria?                                                                                                                                          | YES ..... 1<br>NO ..... 2                                                                                                                                                                                                                                                                                                                                       | → 431 |
| 429 | What are the ways to avoid getting malaria?<br><br>PROBE: Anything else?<br><br>RECORD ALL MENTIONED                                                                              | SLEEP UNDER MOSQUITO NET ..... A<br>SLEEP UNDER AN INSECTICIDE<br>TREATED NET ..... B<br>TAKING PREVENTIVE<br>MEDICATION ..... C<br>USE MOSQUITO REPELLANT ..... D<br>SPRAYING HOUSE WITH<br>INSECTICIDE ..... E<br>USING MOSQUITO COILS ..... F<br>DESTROY MOSQUITO<br>BREEDING SITES ..... G<br>OTHER ..... X<br>(SPECIFY)<br>DONT KNOW ..... Z               |       |
| 430 | What medicine may be given to a pregnant woman to help her avoid getting malaria?<br><br>RECORD ALL MENTIONED                                                                     | SP/FANSIDAR ..... A<br>CHLOROQUINE ..... B<br>CHLOROQUINE<br>W/ FANSIDAR ..... C<br>COARTEM/ACT ..... D<br>OTHER ..... X<br>(SPECIFY)<br>DONT KNOW ..... Z                                                                                                                                                                                                      |       |
| 431 | CHECK 430 SP/FANSIDAR MENTIONED<br>CODE 'A' <input type="checkbox"/><br>CIRCLED ↓<br>CODE 'A' NOT <input type="checkbox"/><br>CIRCLED                                             |                                                                                                                                                                                                                                                                                                                                                                 | → 433 |
| 432 | How many times does a woman need to take SP/FANSIDAR during her pregnancy to avoid getting malaria?                                                                               | NUMBER OF<br>TIMES ..... <input type="text"/> <input type="text"/><br>DONT KNOW ..... 98                                                                                                                                                                                                                                                                        |       |
| 433 | RECORD THE TIME.                                                                                                                                                                  | HOUR ..... <input type="text"/> <input type="text"/><br>MINUTES ..... <input type="text"/> <input type="text"/>                                                                                                                                                                                                                                                 |       |

INTERVIEWER'S OBSERVATIONS

TO BE FILLED IN AFTER COMPLETING INTERVIEW

COMMENTS ABOUT RESPONDENT:

---

---

---

---

---

---

COMMENTS ON SPECIFIC QUESTIONS:

---

---

---

---

---

ANY OTHER COMMENTS:

---

---

---

---

---

SUPERVISOR'S OBSERVATIONS

---

---

---

---

---

---

---

---

NAME OF SUPERVISOR: \_\_\_\_\_ DATE: \_\_\_\_\_
